# Supplementary material for: Isolation and Structure-Activity Relationship of Subergorgic Acid and Synthesis of Its Derivatives as Antifouling Agent
Source: MDPI journal article supplement (doi:10.3390/md17020101), 2019-02-06

## Supporting information for journal *Marine drugs*

# Isolation, Structure-activity Relationship of Subergorgic Acid and Synthesis of Its Derivatives as Antifouling Agent

Jun Zhang <sup>1,3\*</sup>, Wei Ling <sup>1</sup>, Zhiqiang Yang <sup>1</sup>, Yan Liang <sup>1</sup>, Linyan Zhang <sup>1</sup>, Can Guo <sup>1</sup>, Kailing Wang <sup>2</sup>, Balian Zhong <sup>1</sup>, Shihai Xu <sup>3,\*</sup> and Ying Xu <sup>2,\*</sup>

<sup>1</sup> National Engineering Research Center of Navel Orange, Gannan Normal University, Ganzhou, 341000, China; lw791010@163.com (W.L.); 15707975909@163.com (Z.Y.); zjzzf2011@gmail.com (Y.L.); 18573488362@139.com (L.Z.); 15225960215@139.com (C.G.); bal.zh@163.com (B.Z.)

<sup>2</sup> College of Life Science and Oceanography, Shenzhen University, Shenzhen, 518000, China; 15216101485@163.com (K.W.)

<sup>3</sup> Department of Chemistry, Jinan University, Guangzhou, 510000, China.

\* Correspondence: bri71527152@outlook.com (J.Z.); boxuying@szu.edu.cn (Y.X.); txush@jnu.edu.cn (S.X.); Tel.: +86-797-8393068 (J.Z.); +86-755-26958849 (Y.X.)

## Table of contents

|                                                                                         |           |                                                                                          |    |
|-----------------------------------------------------------------------------------------|-----------|------------------------------------------------------------------------------------------|----|
| <b>Figure S1.</b> Key NOE correlations of <b>4</b> .                                    | Page<br>3 | <b>Figure S43.</b> $^{13}\text{C}$ NMR (100 MHz, $\text{CDCl}_3$ ) of compound <b>19</b> | 45 |
| <b>Figure S2.</b> $^1\text{H}$ NMR (400 MHz, $\text{CDCl}_3$ ) of compound <b>SA</b>    | 4         | <b>Figure S44.</b> $^1\text{H}$ NMR (400 MHz, $\text{CDCl}_3$ ) of compound <b>20</b>    | 46 |
| <b>Figure S3.</b> $^{13}\text{C}$ NMR (100 MHz, $\text{CDCl}_3$ ) of compound <b>SA</b> | 5         | <b>Figure S45.</b> $^{13}\text{C}$ NMR (100 MHz, $\text{CDCl}_3$ ) of compound <b>20</b> | 47 |
| <b>Figure S4.</b> $^1\text{H}$ NMR (300 MHz, $\text{CDCl}_3$ ) of compound <b>1</b>     | 6         | <b>Figure S46.</b> $^1\text{H}$ NMR (300 MHz, $\text{CDCl}_3$ ) of compound <b>21</b>    | 48 |
| <b>Figure S5.</b> $^{13}\text{C}$ NMR (75 MHz, $\text{CDCl}_3$ ) of compound <b>1</b>   | 7         | <b>Figure S47.</b> $^{13}\text{C}$ NMR (75 MHz, $\text{CDCl}_3$ ) of compound <b>21</b>  | 49 |
| <b>Figure S6.</b> $^1\text{H}$ NMR (300 MHz, $\text{CDCl}_3$ ) of compound <b>2</b>     | 8         | <b>Figure S48.</b> $^1\text{H}$ NMR (300 MHz, $\text{CDCl}_3$ ) of compound <b>22</b>    | 50 |
| <b>Figure S7.</b> $^{13}\text{C}$ NMR (75 MHz, $\text{CDCl}_3$ ) of compound <b>2</b>   | 9         | <b>Figure S49.</b> $^{13}\text{C}$ NMR (75 MHz, $\text{CDCl}_3$ ) of compound <b>22</b>  | 51 |
| <b>Figure S8.</b> $^1\text{H}$ NMR (400 MHz, $\text{CDCl}_3$ ) of compound <b>3</b>     | 10        | <b>Figure S50.</b> $^1\text{H}$ NMR (300 MHz, $\text{CDCl}_3$ ) of compound <b>23</b>    | 52 |
| <b>Figure S9.</b> $^{13}\text{C}$ NMR (100 MHz, $\text{CDCl}_3$ ) of compound <b>3</b>  | 11        | <b>Figure S51.</b> $^{13}\text{C}$ NMR (75 MHz, $\text{CDCl}_3$ ) of compound <b>23</b>  | 53 |
| <b>Figure S10.</b> $^1\text{H}$ NMR (300 MHz, $\text{CDCl}_3$ ) of compound <b>4</b>    | 12        | <b>Figure S52.</b> $^1\text{H}$ NMR (300 MHz, $\text{CDCl}_3$ ) of compound <b>24</b>    | 54 |
| <b>Figure S11.</b> $^{13}\text{C}$ NMR (75 MHz, $\text{CDCl}_3$ ) of compound <b>4</b>  | 13        | <b>Figure S53.</b> $^{13}\text{C}$ NMR (75 MHz, $\text{CDCl}_3$ ) of compound <b>24</b>  | 55 |
| <b>Figure S12.</b> HSQC spectrum of compound <b>4</b>                                   | 14        | <b>Figure S54.</b> $^1\text{H}$ NMR (300 MHz, $\text{CDCl}_3$ ) of compound <b>25</b>    | 56 |
| <b>Figure S13.</b> NOESY spectrum of compound <b>4</b>                                  | 15        | <b>Figure S55.</b> $^{13}\text{C}$ NMR (75 MHz, $\text{CDCl}_3$ ) of compound <b>25</b>  | 57 |
| <b>Figure S14.</b> $^1\text{H}$ NMR (400 MHz, $\text{CDCl}_3$ ) of compound <b>5</b>    | 16        | <b>Figure S56.</b> $^1\text{H}$ NMR (300 MHz, $\text{CDCl}_3$ ) of compound <b>26</b>    | 58 |
| <b>Figure S15.</b> $^{13}\text{C}$ NMR (100 MHz, $\text{CDCl}_3$ ) of compound <b>5</b> | 17        | <b>Figure S57.</b> $^{13}\text{C}$ NMR (75 MHz, $\text{CDCl}_3$ ) of compound <b>26</b>  | 59 |
| <b>Figure S16.</b> $^1\text{H}$ NMR (300 MHz, $\text{CDCl}_3$ ) of compound <b>6</b>    | 18        | <b>Figure S58.</b> HRMS of compound <b>4</b>                                             | 60 |
| <b>Figure S17.</b> $^{13}\text{C}$ NMR (75 MHz, $\text{CDCl}_3$ ) of compound <b>6</b>  | 19        | <b>Figure S59.</b> HRMS of compound <b>5</b>                                             | 61 |
| <b>Figure S18.</b> $^1\text{H}$ NMR (300 MHz, $\text{CDCl}_3$ ) of compound <b>7</b>    | 20        | <b>Figure S60.</b> HRMS of compound <b>8</b>                                             | 62 |
| <b>Figure S19.</b> $^{13}\text{C}$ NMR (75 MHz, $\text{CDCl}_3$ ) of compound <b>7</b>  | 21        | <b>Figure S61.</b> HRMS of compound <b>10</b>                                            | 63 |
| <b>Figure S20.</b> $^1\text{H}$ NMR (300 MHz, $\text{CDCl}_3$ ) of compound <b>8</b>    | 22        | <b>Figure S62.</b> HRMS of compound <b>11</b>                                            | 64 |
| <b>Figure S21.</b> $^{13}\text{C}$ NMR (75 MHz, $\text{CDCl}_3$ ) of compound <b>8</b>  | 23        | <b>Figure S63.</b> HRMS of compound <b>13</b>                                            | 65 |
| <b>Figure S22.</b> $^1\text{H}$ NMR (300 MHz, $\text{CDCl}_3$ ) of compound <b>9</b>    | 24        | <b>Figure S64.</b> HRMS of compound <b>14</b>                                            | 66 |
| <b>Figure S23.</b> $^{13}\text{C}$ NMR (75 MHz, $\text{CDCl}_3$ ) of compound <b>9</b>  | 25        | <b>Figure S65.</b> HRMS of compound <b>1</b>                                             | 67 |
| <b>Figure S24.</b> $^1\text{H}$ NMR (300 MHz, $\text{CDCl}_3$ ) of compound <b>10</b>   | 26        | <b>Figure S66.</b> HRMS of compound <b>2</b>                                             | 68 |
| <b>Figure S25.</b> $^{13}\text{C}$ NMR (75 MHz, $\text{CDCl}_3$ ) of compound <b>10</b> | 27        | <b>Figure S67.</b> HRMS of compound <b>3</b>                                             | 69 |
| <b>Figure S26.</b> $^1\text{H}$ NMR (300 MHz, $\text{CDCl}_3$ ) of compound <b>11</b>   | 28        | <b>Figure S68.</b> HRMS of compound <b>6</b>                                             | 70 |
| <b>Figure S27.</b> $^{13}\text{C}$ NMR (75 MHz, $\text{CDCl}_3$ ) of compound <b>11</b> | 29        | <b>Figure S69.</b> HRMS of compound <b>7</b>                                             | 71 |
| <b>Figure S28.</b> $^1\text{H}$ NMR (300 MHz, $\text{CDCl}_3$ ) of compound <b>12</b>   | 30        | <b>Figure S70.</b> HRMS of compound <b>9</b>                                             | 72 |
| <b>Figure S29.</b> $^{13}\text{C}$ NMR (75 MHz, $\text{CDCl}_3$ ) of compound <b>12</b> | 31        | <b>Figure S71.</b> HRMS of compound <b>12</b>                                            | 73 |
| <b>Figure S30.</b> $^1\text{H}$ NMR (300 MHz, $\text{CDCl}_3$ ) of compound <b>13</b>   | 32        | <b>Figure S72.</b> HRMS of compound <b>15</b>                                            | 74 |
| <b>Figure S31.</b> $^{13}\text{C}$ NMR (75 MHz, $\text{CDCl}_3$ ) of compound <b>13</b> | 33        | <b>Figure S73.</b> HRMS of compound <b>16</b>                                            | 75 |
| <b>Figure S32.</b> $^1\text{H}$ NMR (300 MHz, $\text{CDCl}_3$ ) of compound <b>14</b>   | 34        | <b>Figure S74.</b> HRMS of compound <b>17</b>                                            | 76 |

|                                                                                          |    |                                               |    |
|------------------------------------------------------------------------------------------|----|-----------------------------------------------|----|
| <b>Figure S33.</b> $^{13}\text{C}$ NMR (75 MHz, $\text{CDCl}_3$ ) of compound <b>14</b>  | 35 | <b>Figure S75.</b> HRMS of compound <b>18</b> | 77 |
| <b>Figure S34.</b> $^1\text{H}$ NMR (300 MHz, $\text{CDCl}_3$ ) of compound <b>15</b>    | 36 | <b>Figure S76.</b> HRMS of compound <b>19</b> | 78 |
| <b>Figure S35.</b> $^{13}\text{C}$ NMR (75 MHz, $\text{CDCl}_3$ ) of compound <b>15</b>  | 37 | <b>Figure S77.</b> HRMS of compound <b>20</b> | 79 |
| <b>Figure S36.</b> $^1\text{H}$ NMR (400 MHz, $\text{CDCl}_3$ ) of compound <b>16</b>    | 38 | <b>Figure S78.</b> HRMS of compound <b>21</b> | 80 |
| <b>Figure S37.</b> $^{13}\text{C}$ NMR (100 MHz, $\text{CDCl}_3$ ) of compound <b>16</b> | 39 | <b>Figure S79.</b> HRMS of compound <b>22</b> | 81 |
| <b>Figure S38.</b> $^1\text{H}$ NMR (400 MHz, $\text{CDCl}_3$ ) of compound <b>17</b>    | 40 | <b>Figure S80.</b> HRMS of compound <b>23</b> | 82 |
| <b>Figure S39.</b> $^{13}\text{C}$ NMR (100 MHz, $\text{CDCl}_3$ ) of compound <b>17</b> | 41 | <b>Figure S81.</b> HRMS of compound <b>24</b> | 83 |
| <b>Figure S40.</b> $^1\text{H}$ NMR (400 MHz, $\text{CDCl}_3$ ) of compound <b>18</b>    | 42 | <b>Figure S82.</b> HRMS of compound <b>25</b> | 84 |
| <b>Figure S41.</b> $^{13}\text{C}$ NMR (100 MHz, $\text{CDCl}_3$ ) of compound <b>18</b> | 43 | <b>Figure S83.</b> HRMS of compound <b>26</b> | 85 |
| <b>Figure S42.</b> $^1\text{H}$ NMR (400 MHz, $\text{CDCl}_3$ ) of compound <b>19</b>    | 44 |                                               |    |

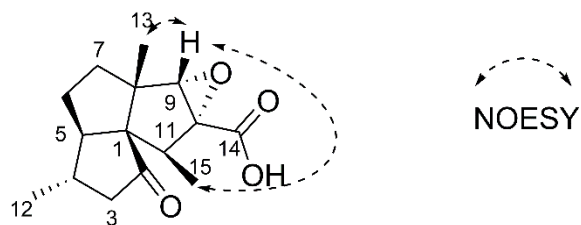

Figure S1. Key NOE correlations of **4**.

**Figure S2.**  $^1\text{H}$  NMR (400 MHz,  $\text{CDCl}_3$ ) of compound **SA**

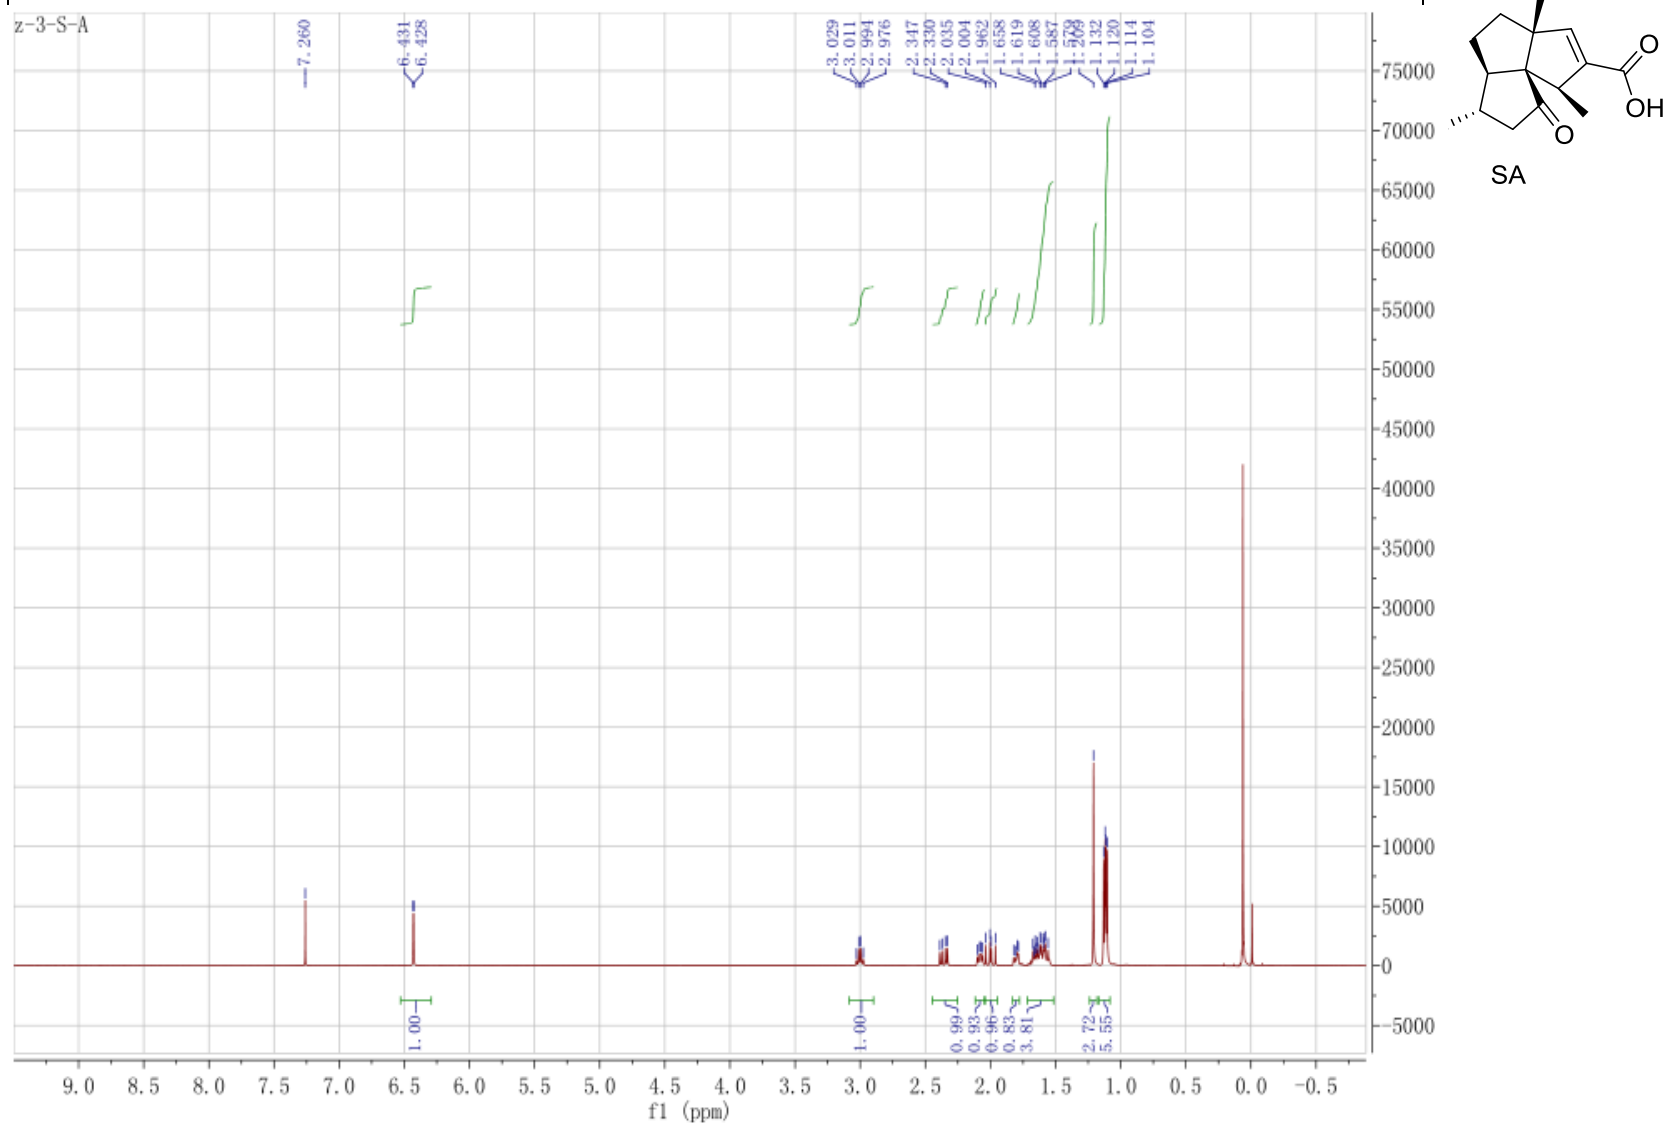

**Figure S3.**  $^{13}\text{C}$  NMR (100 MHz,  $\text{CDCl}_3$ ) of compound SA

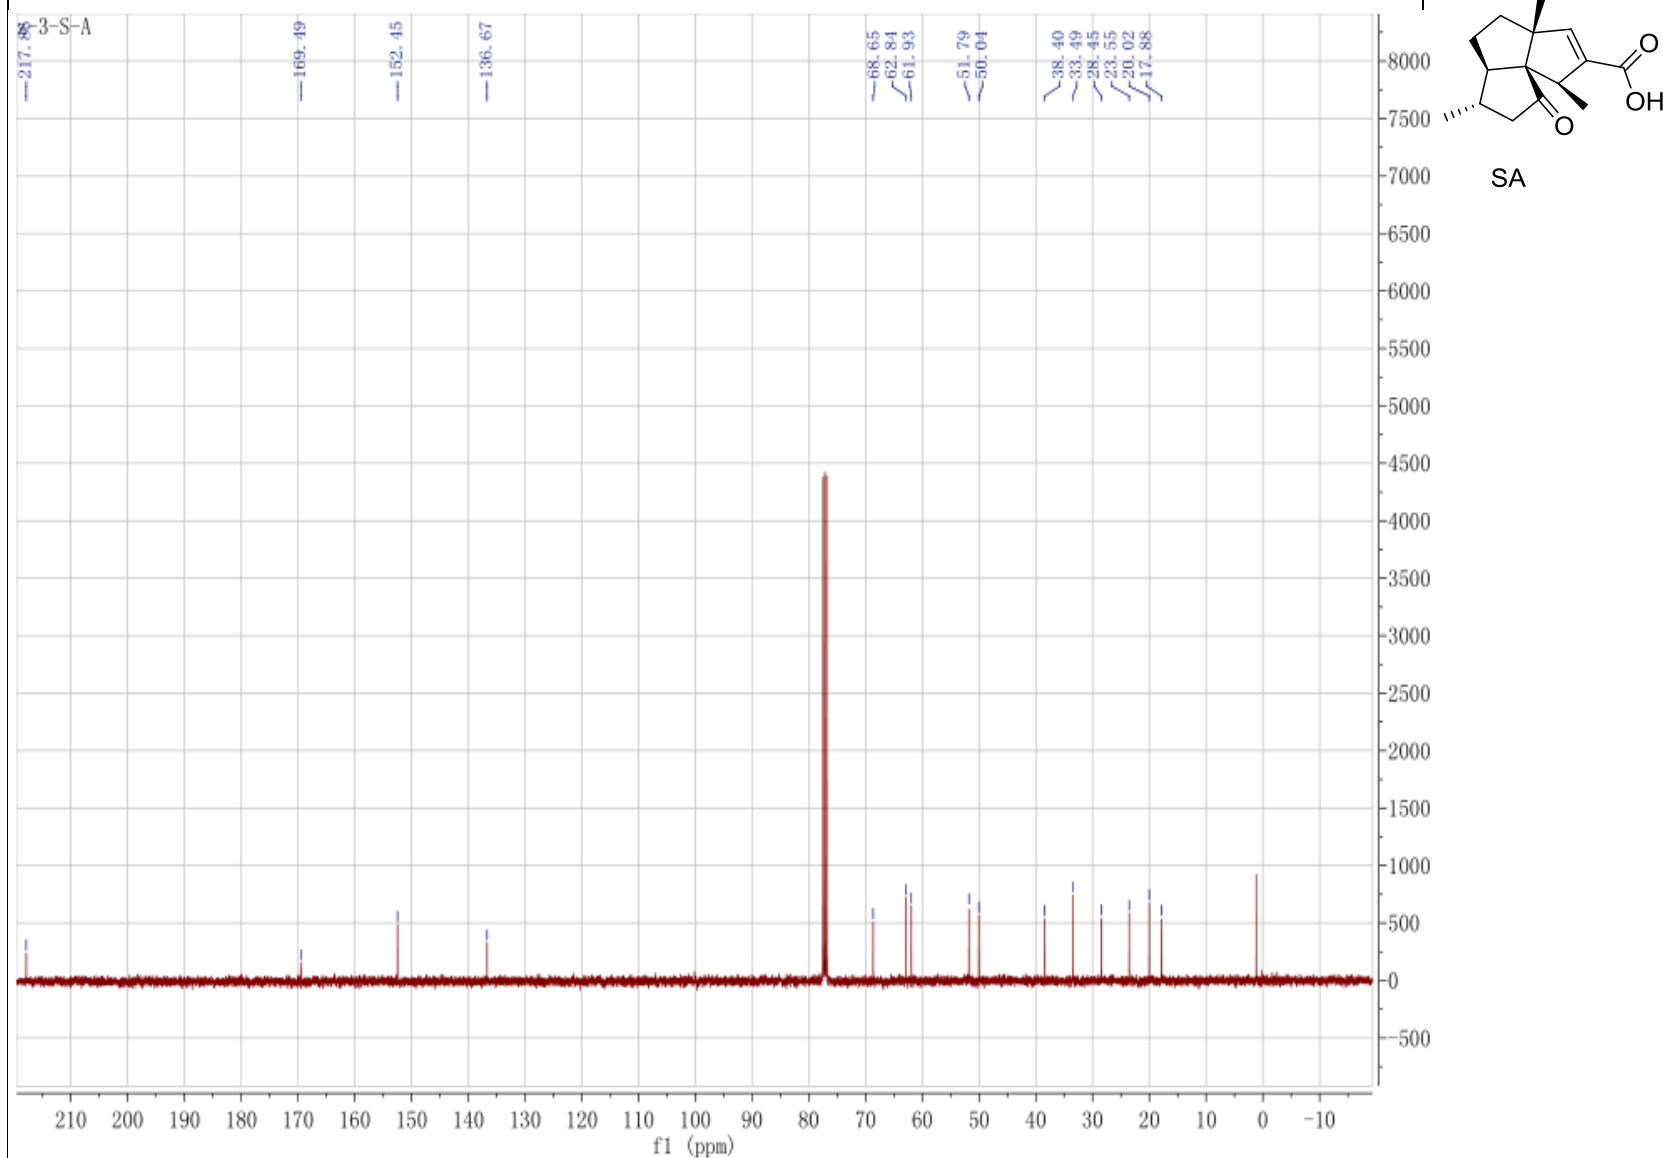

**Figure S4.**  $^1\text{H}$  NMR (300 MHz,  $\text{CDCl}_3$ ) of compound **1**

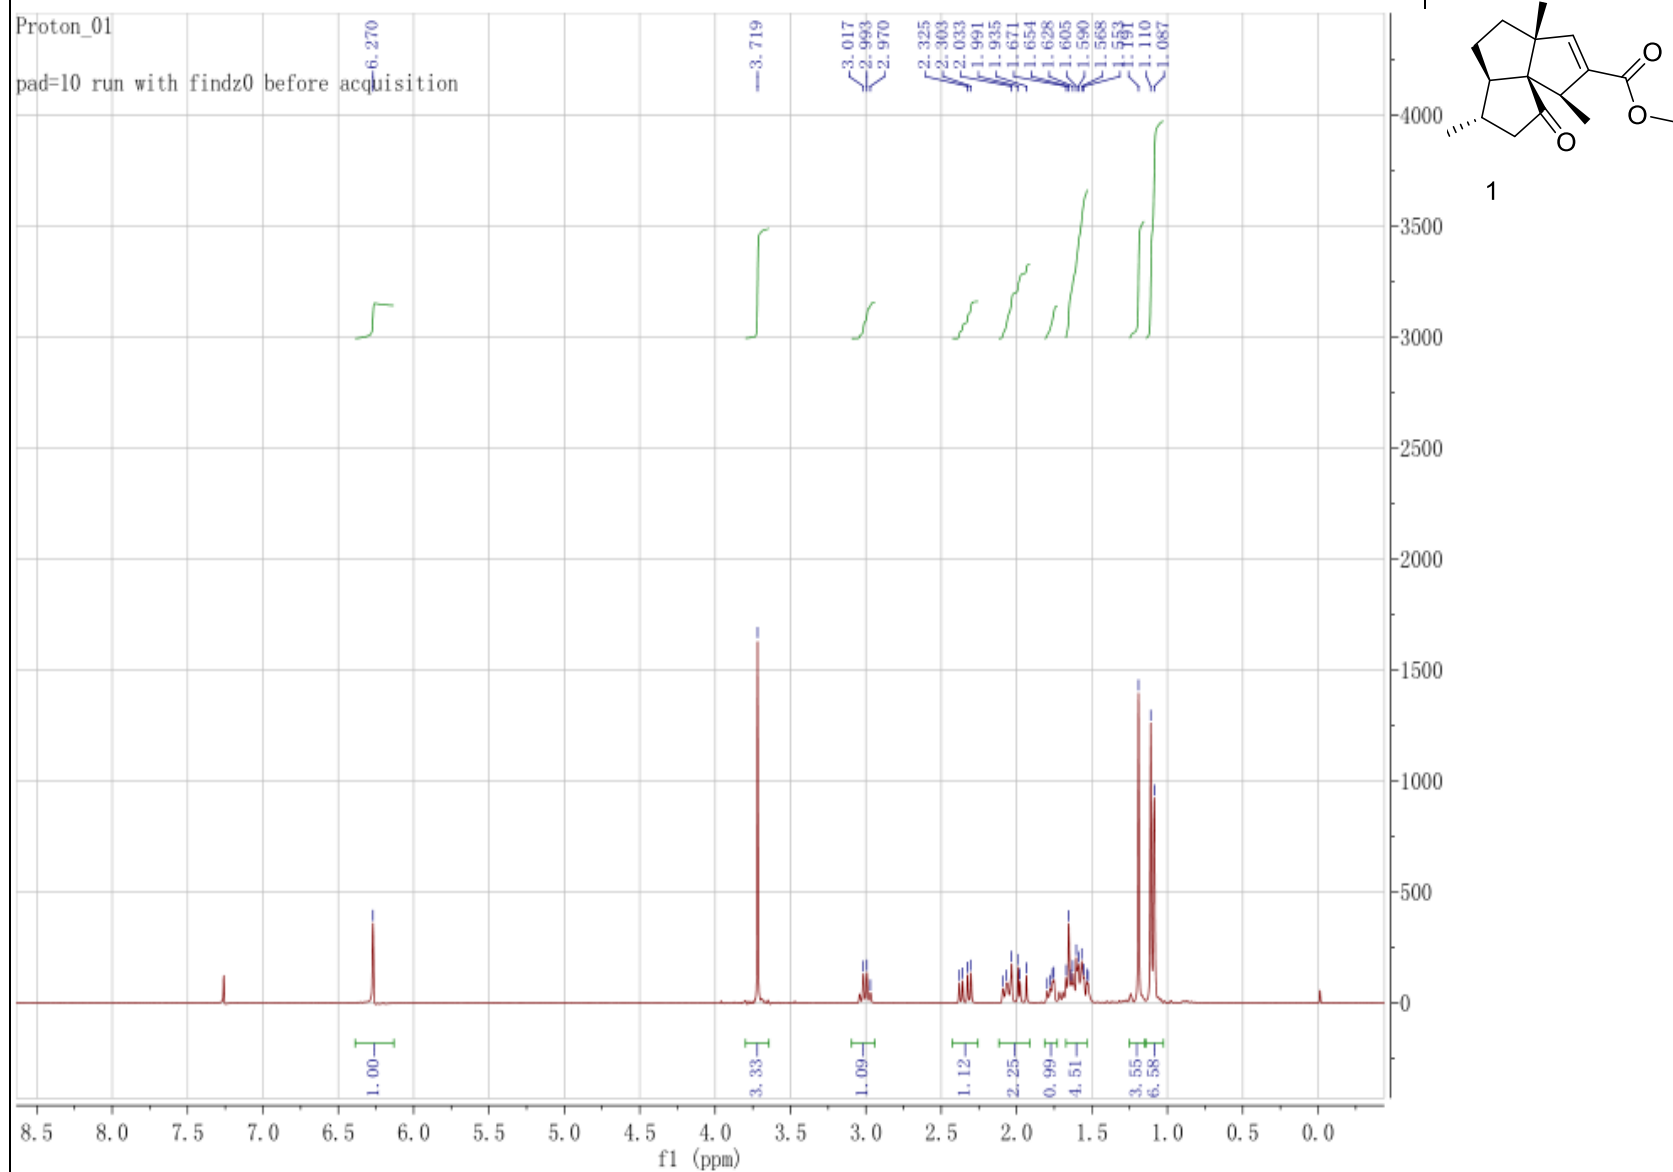

**Figure S5.**  $^{13}\text{C}$  NMR (75 MHz,  $\text{CDCl}_3$ ) of compound **1**

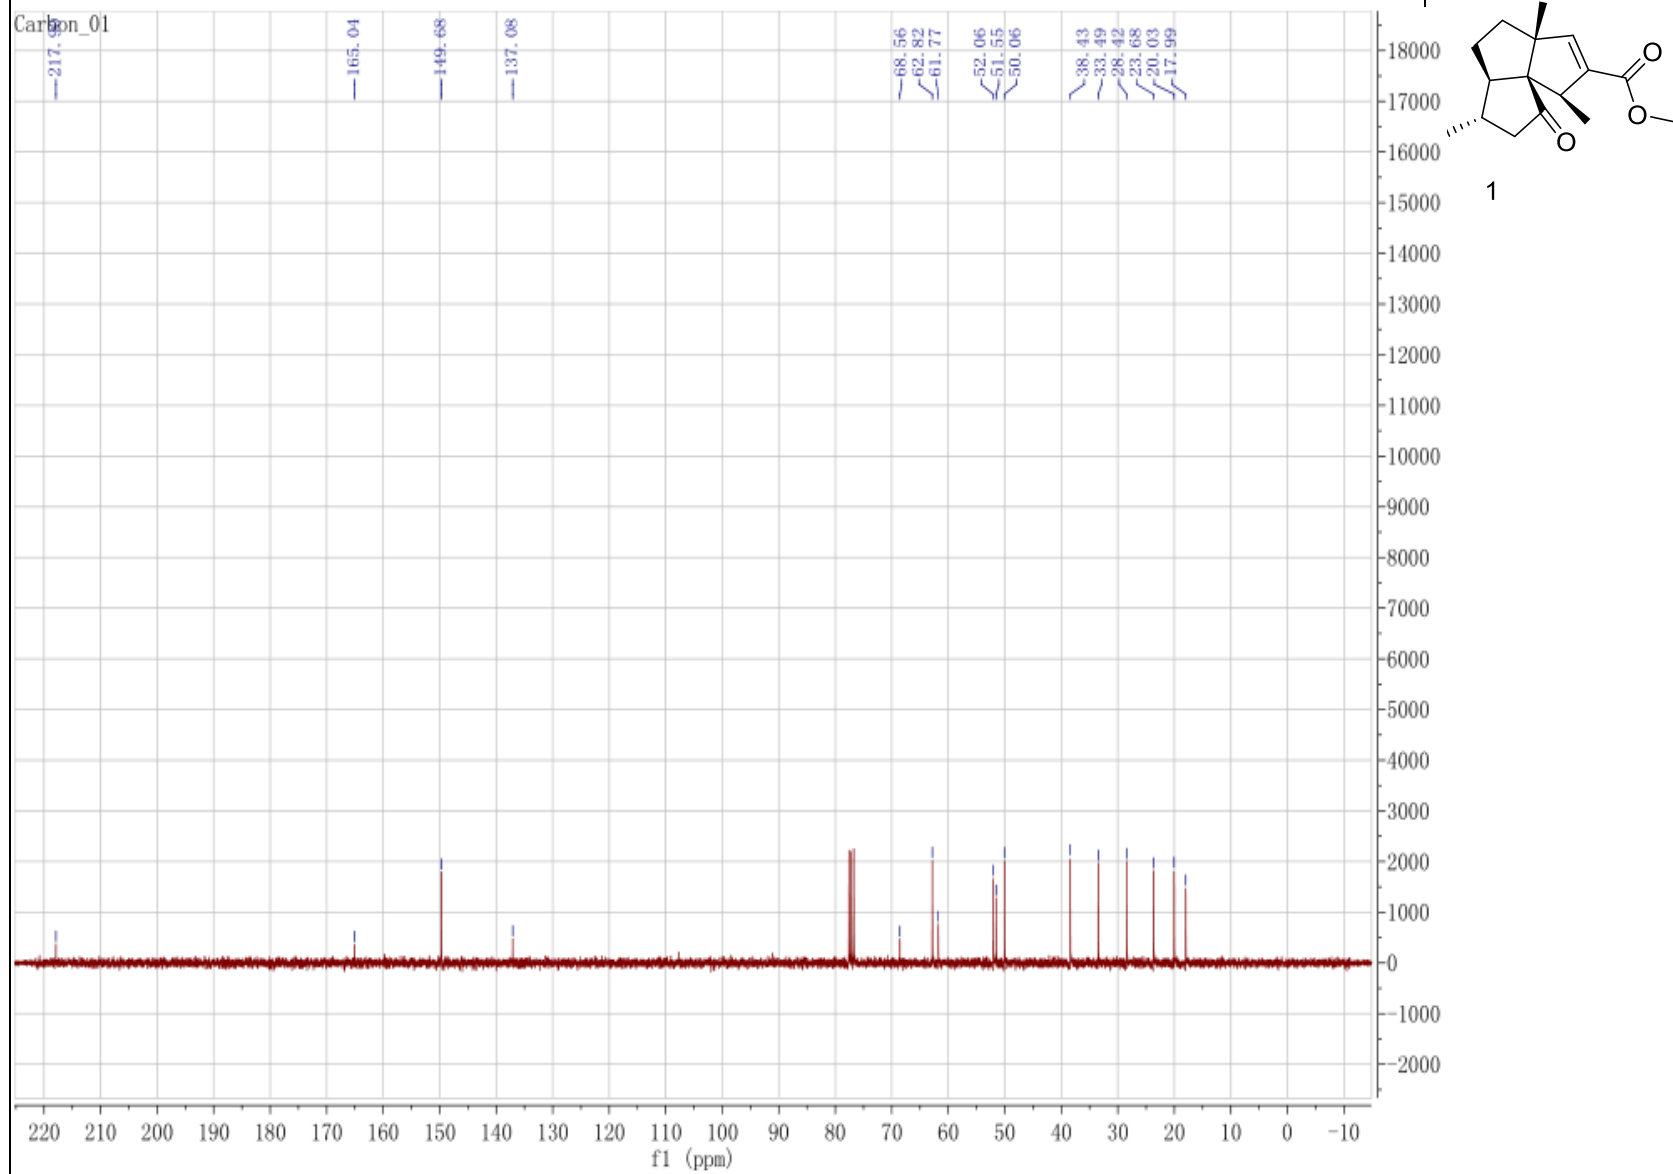

Figure S6.  $^1\text{H}$  NMR (300 MHz,  $\text{CDCl}_3$ ) of compound 2

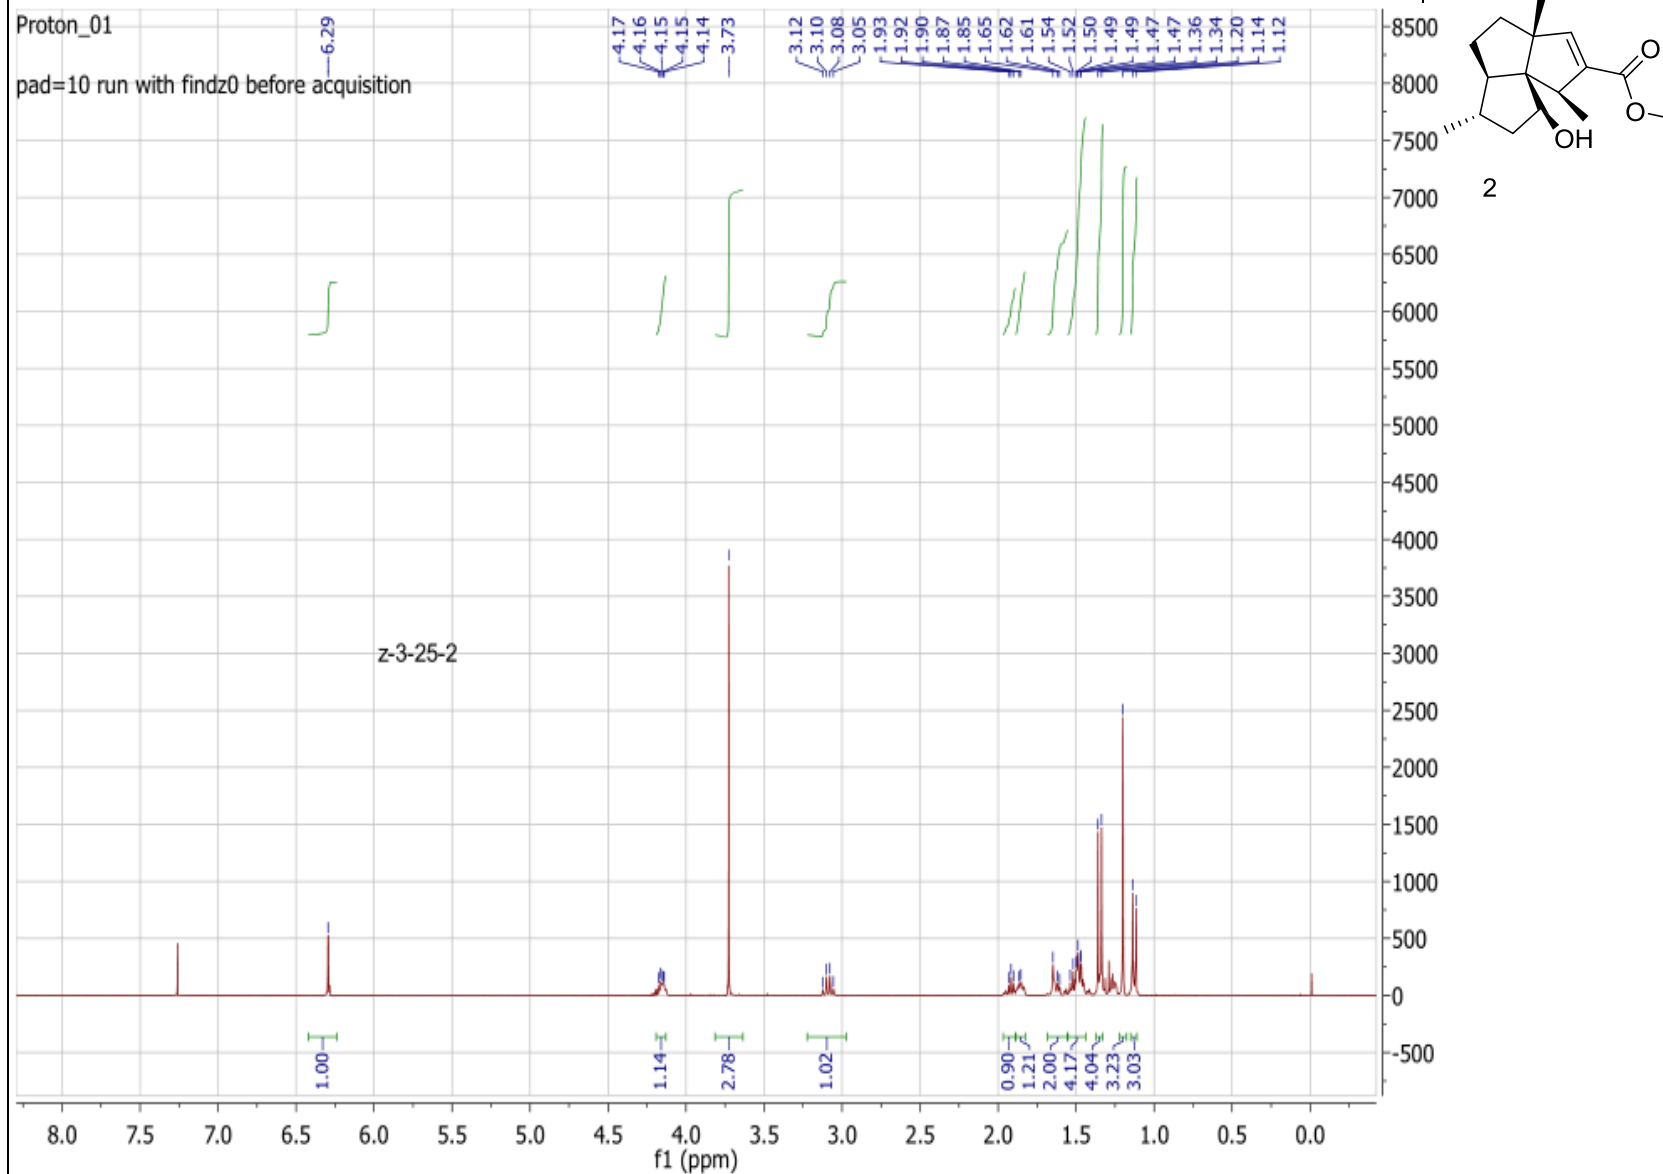



Figure S7.  $^{13}\text{C}$  NMR (75 MHz,  $\text{CDCl}_3$ ) of compound **2**

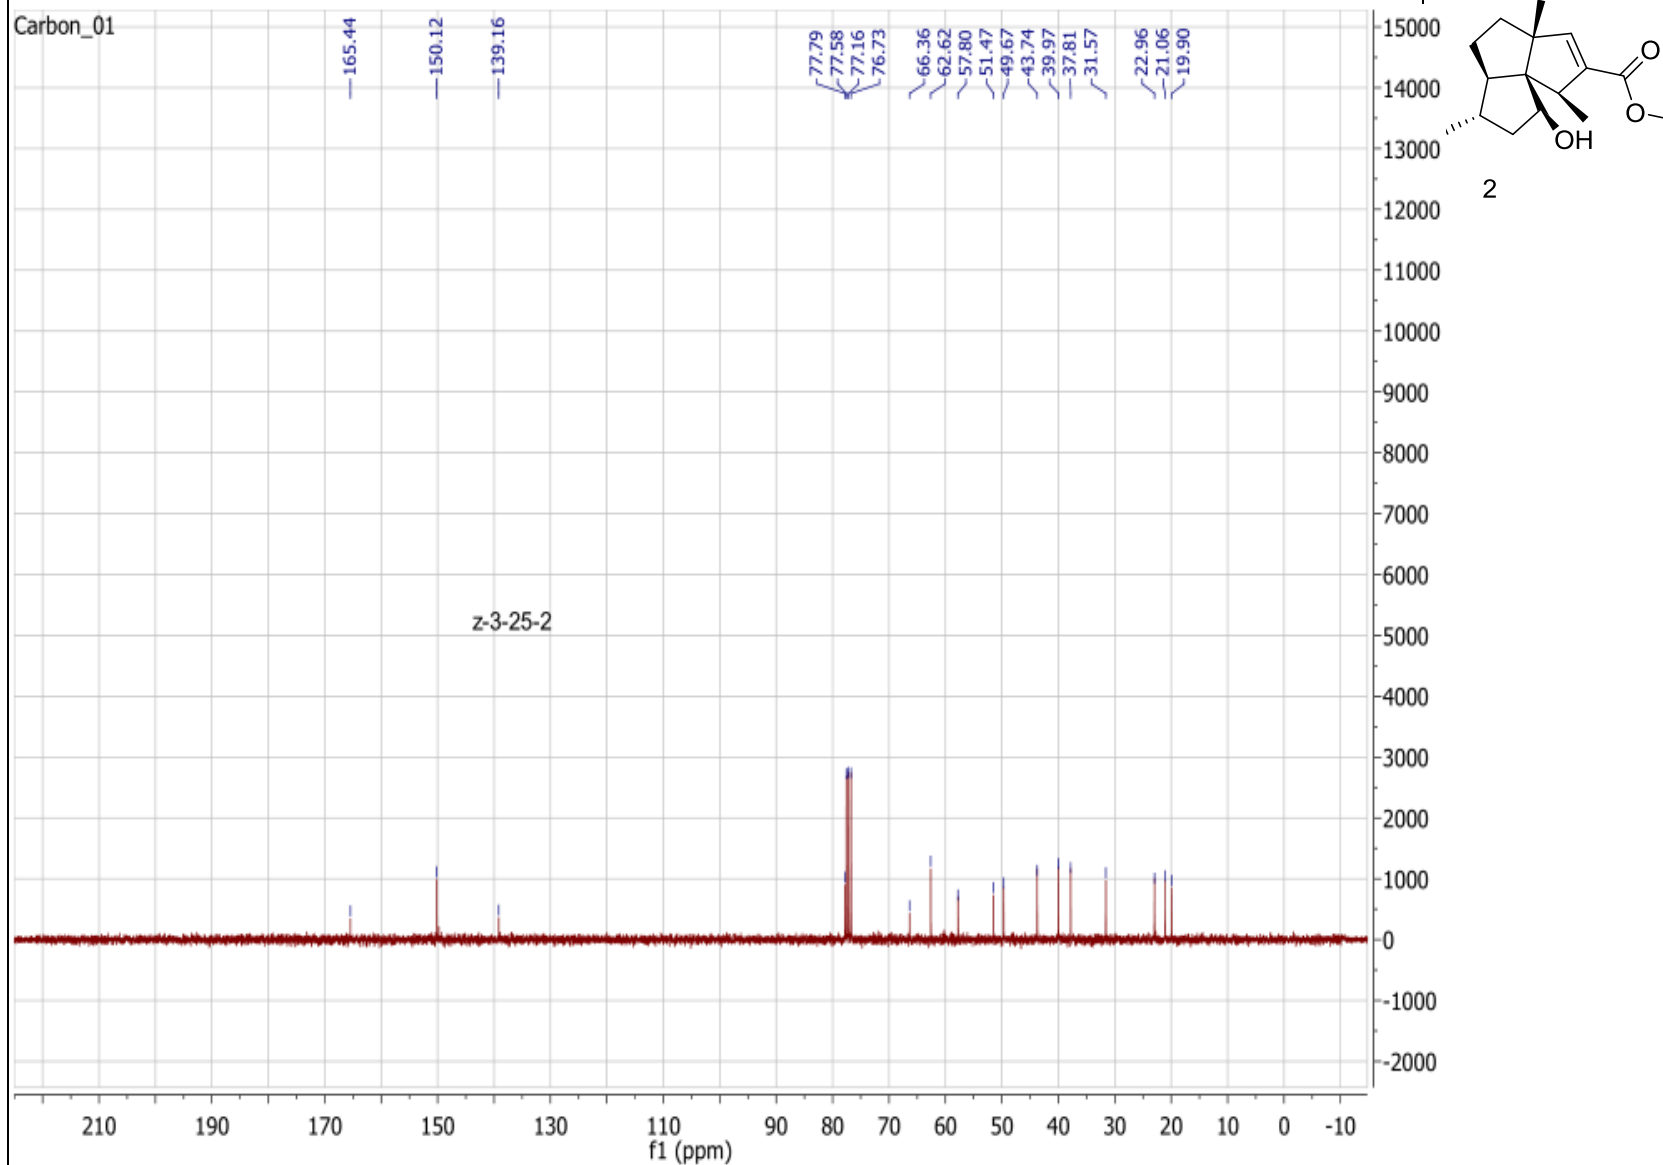

**Figure S8.**  $^1\text{H}$  NMR (400 MHz,  $\text{CDCl}_3$ ) of compound **3**

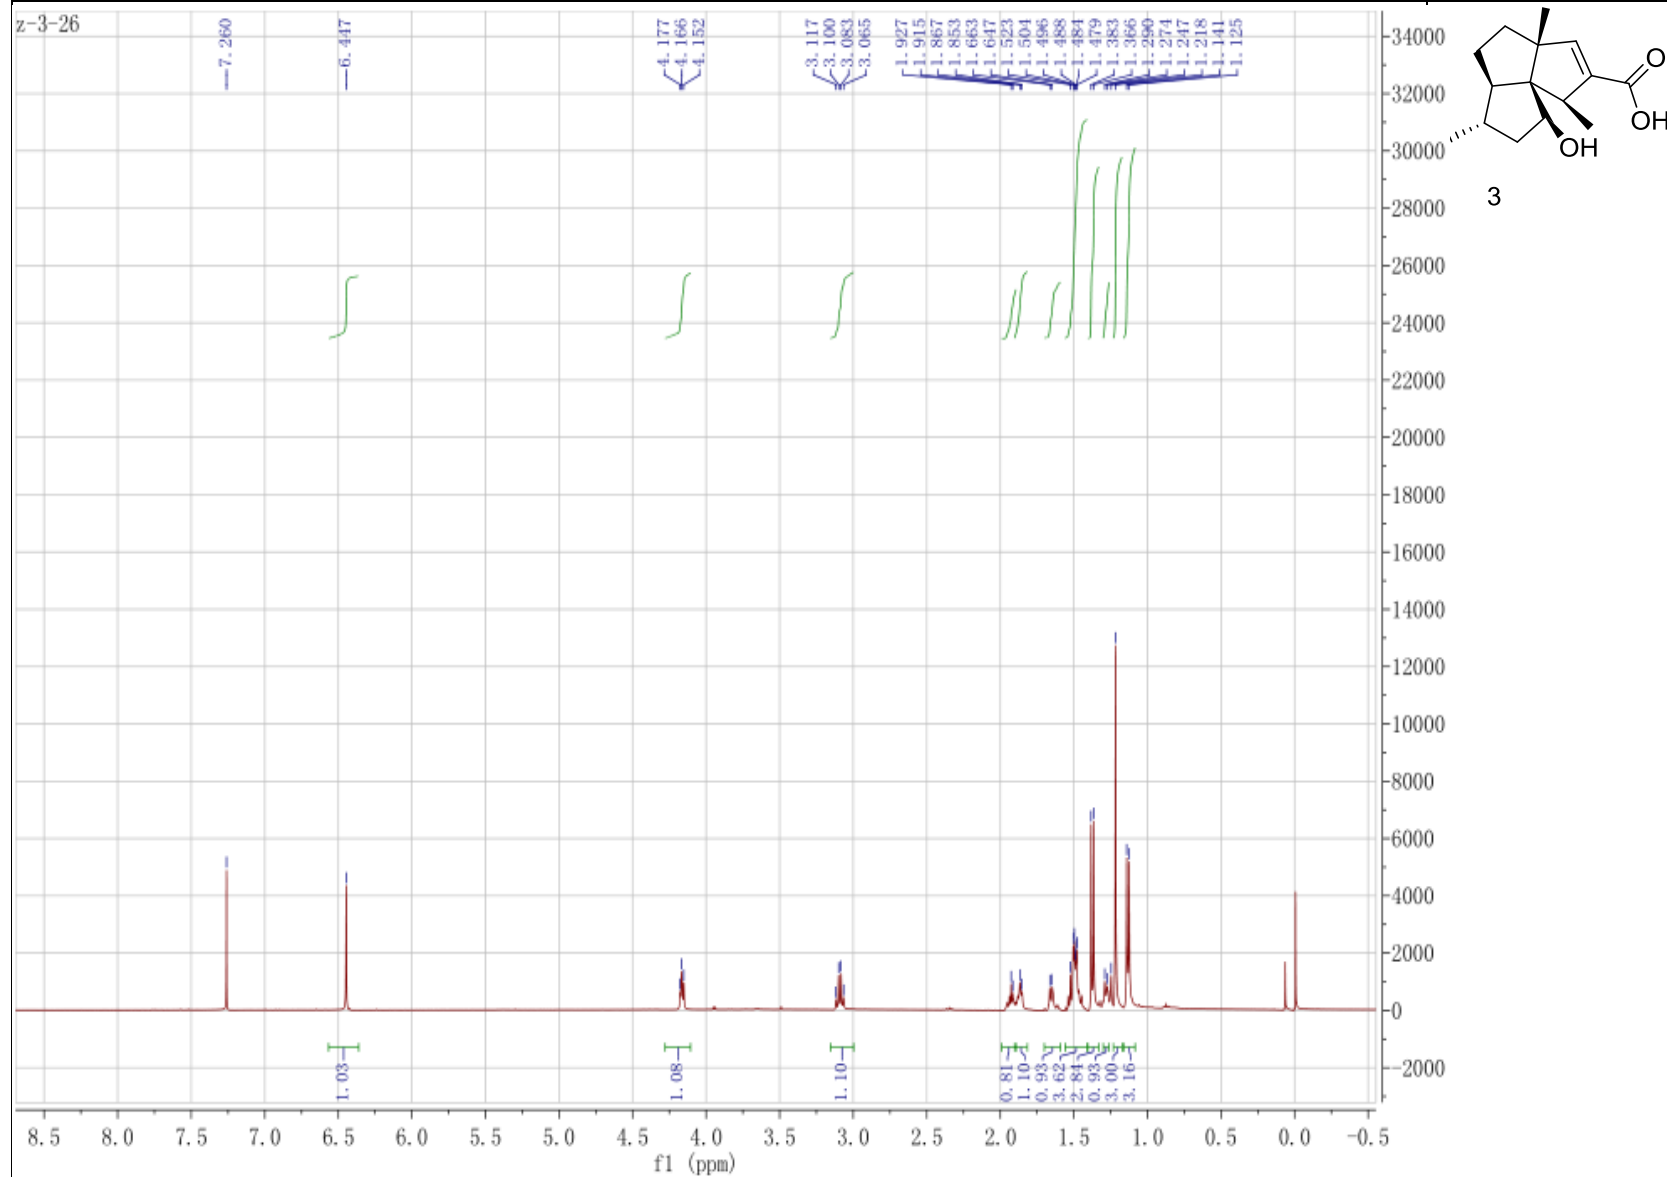

**Figure S9.**  $^{13}\text{C}$  NMR (100 MHz,  $\text{CDCl}_3$ ) of compound **3**

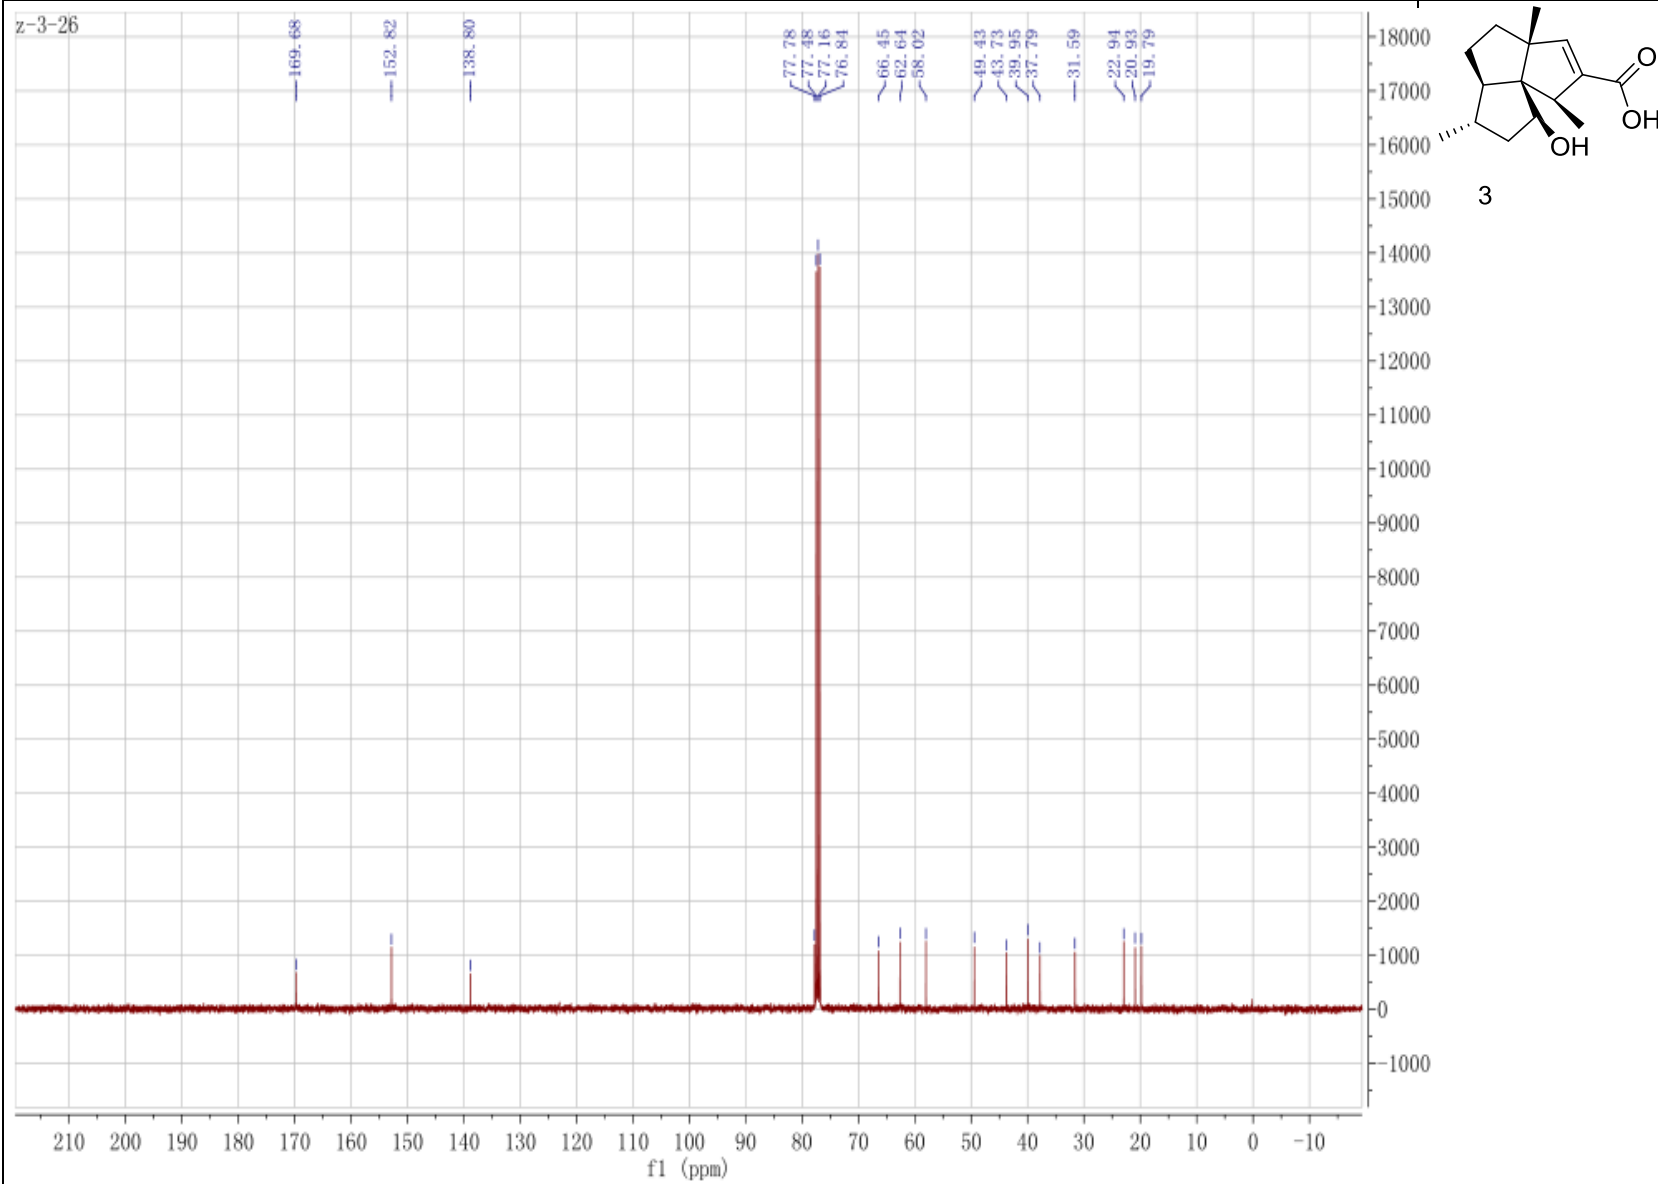

**Figure S10.**  $^1\text{H}$  NMR (300 MHz,  $\text{CDCl}_3$ ) of compound **4**

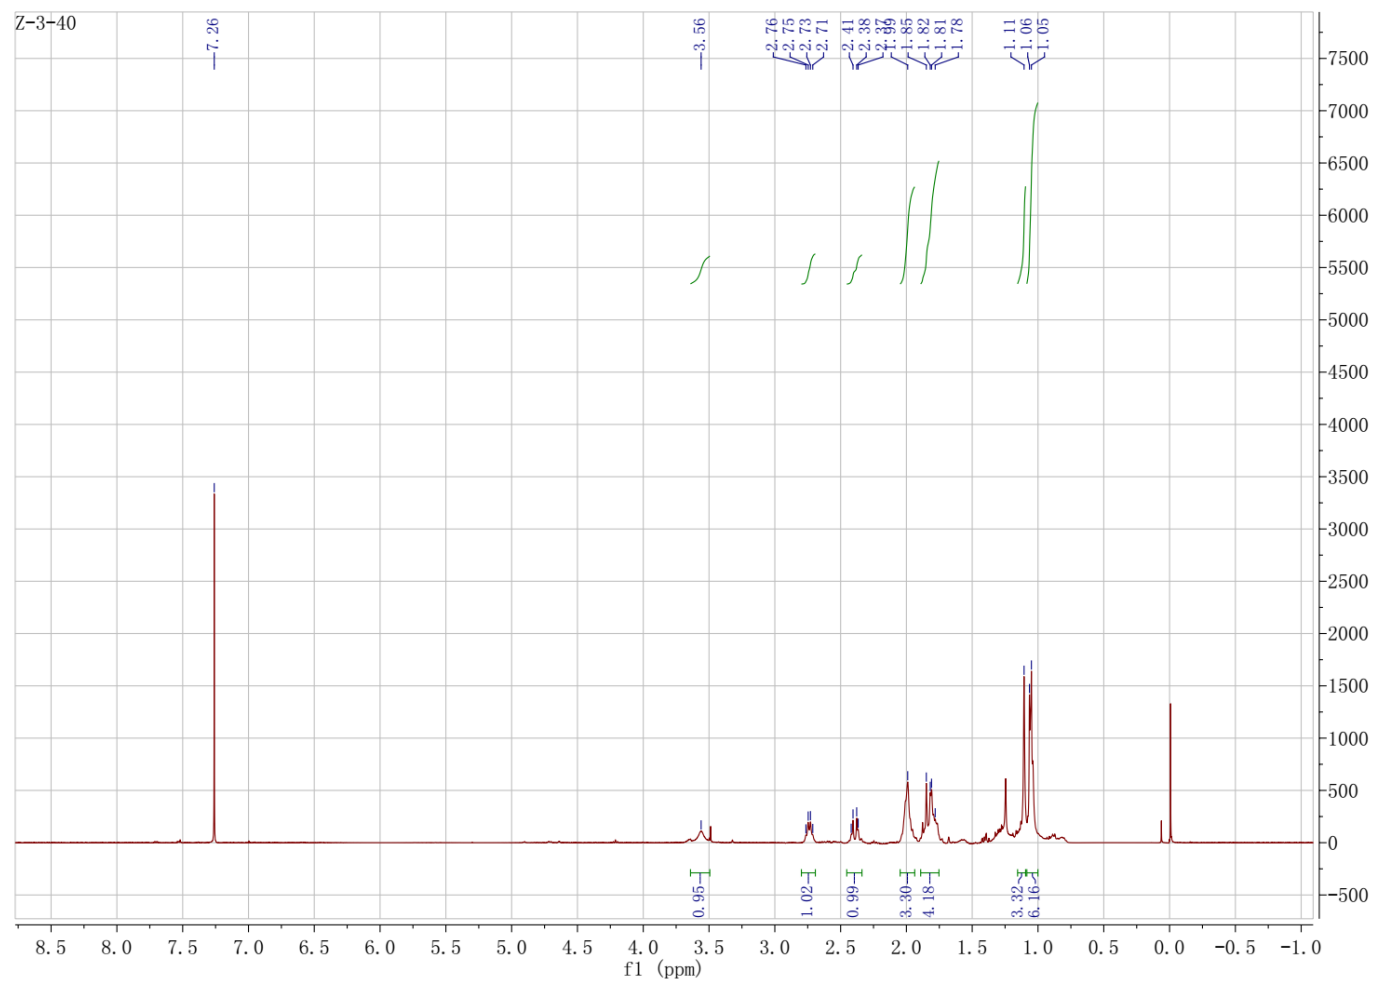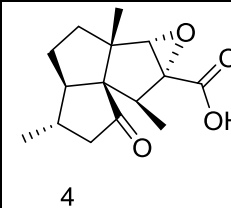

**Figure S11.**  $^{13}\text{C}$  NMR (75 MHz,  $\text{CDCl}_3$ ) of compound **4**

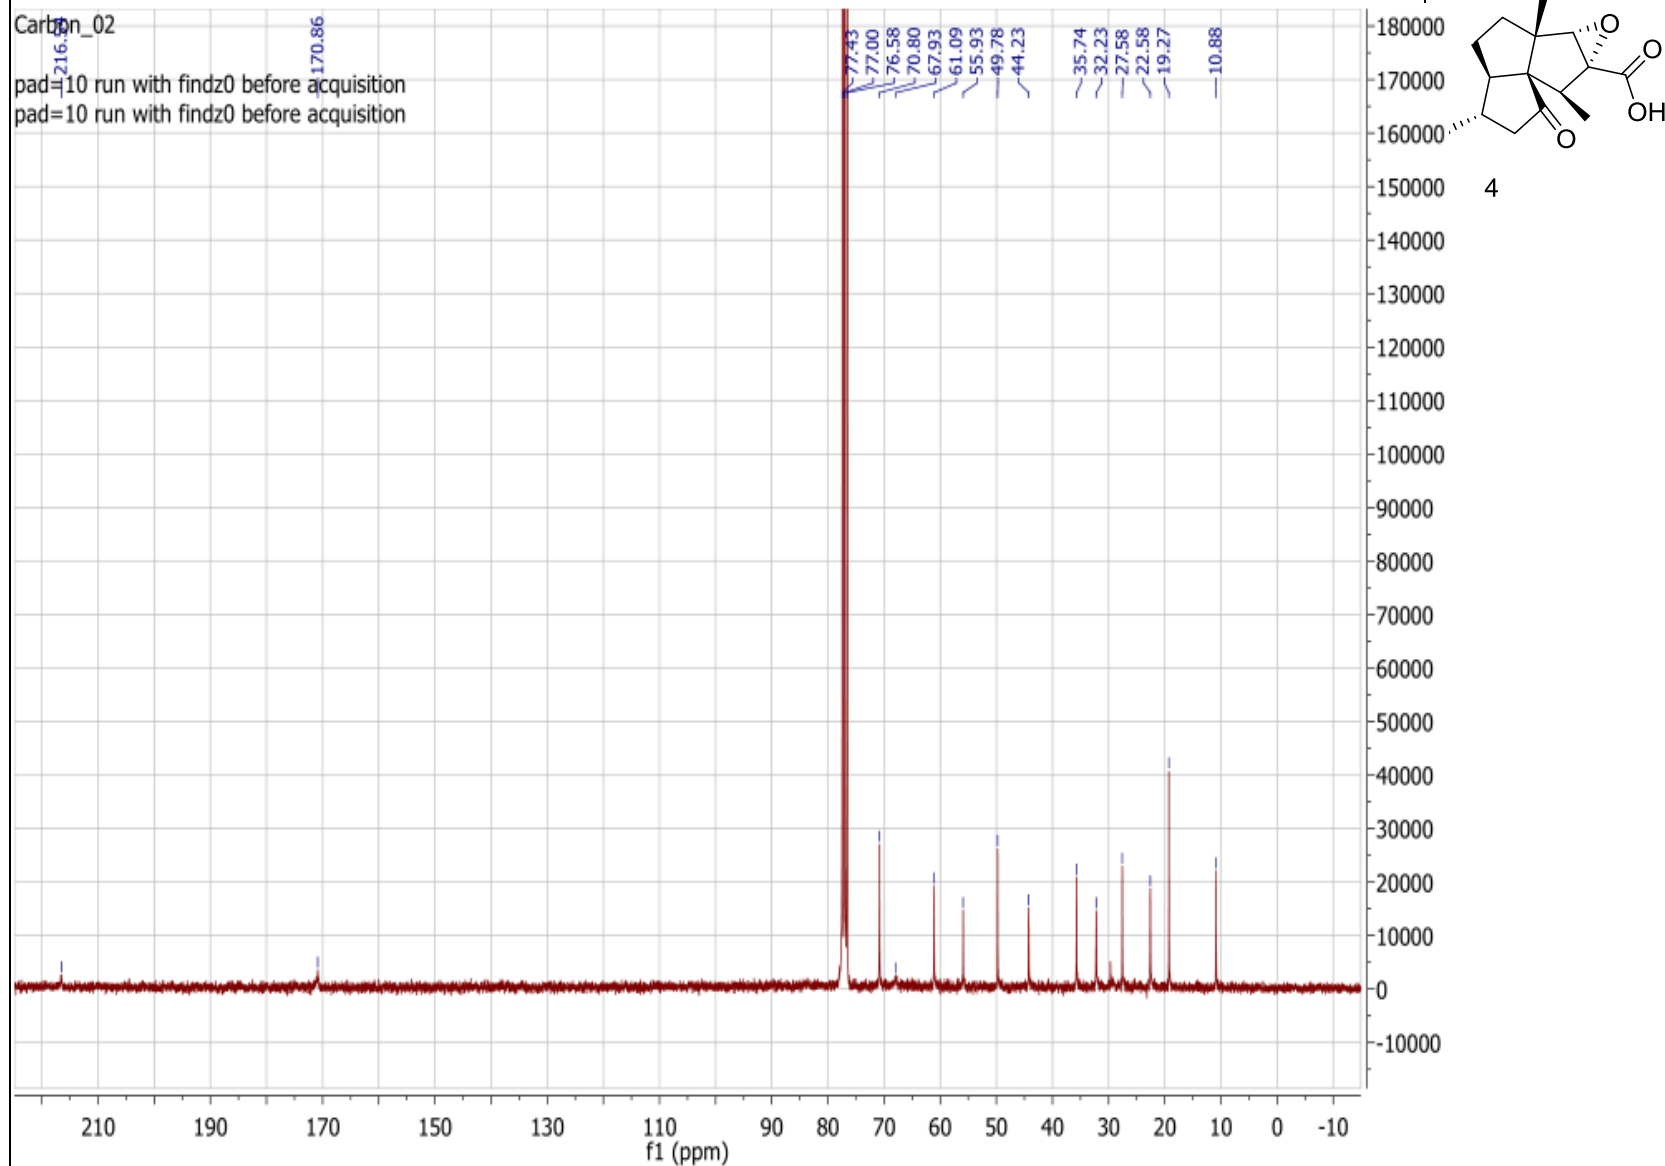

Figure S12. HSQC spectrum of compound 4

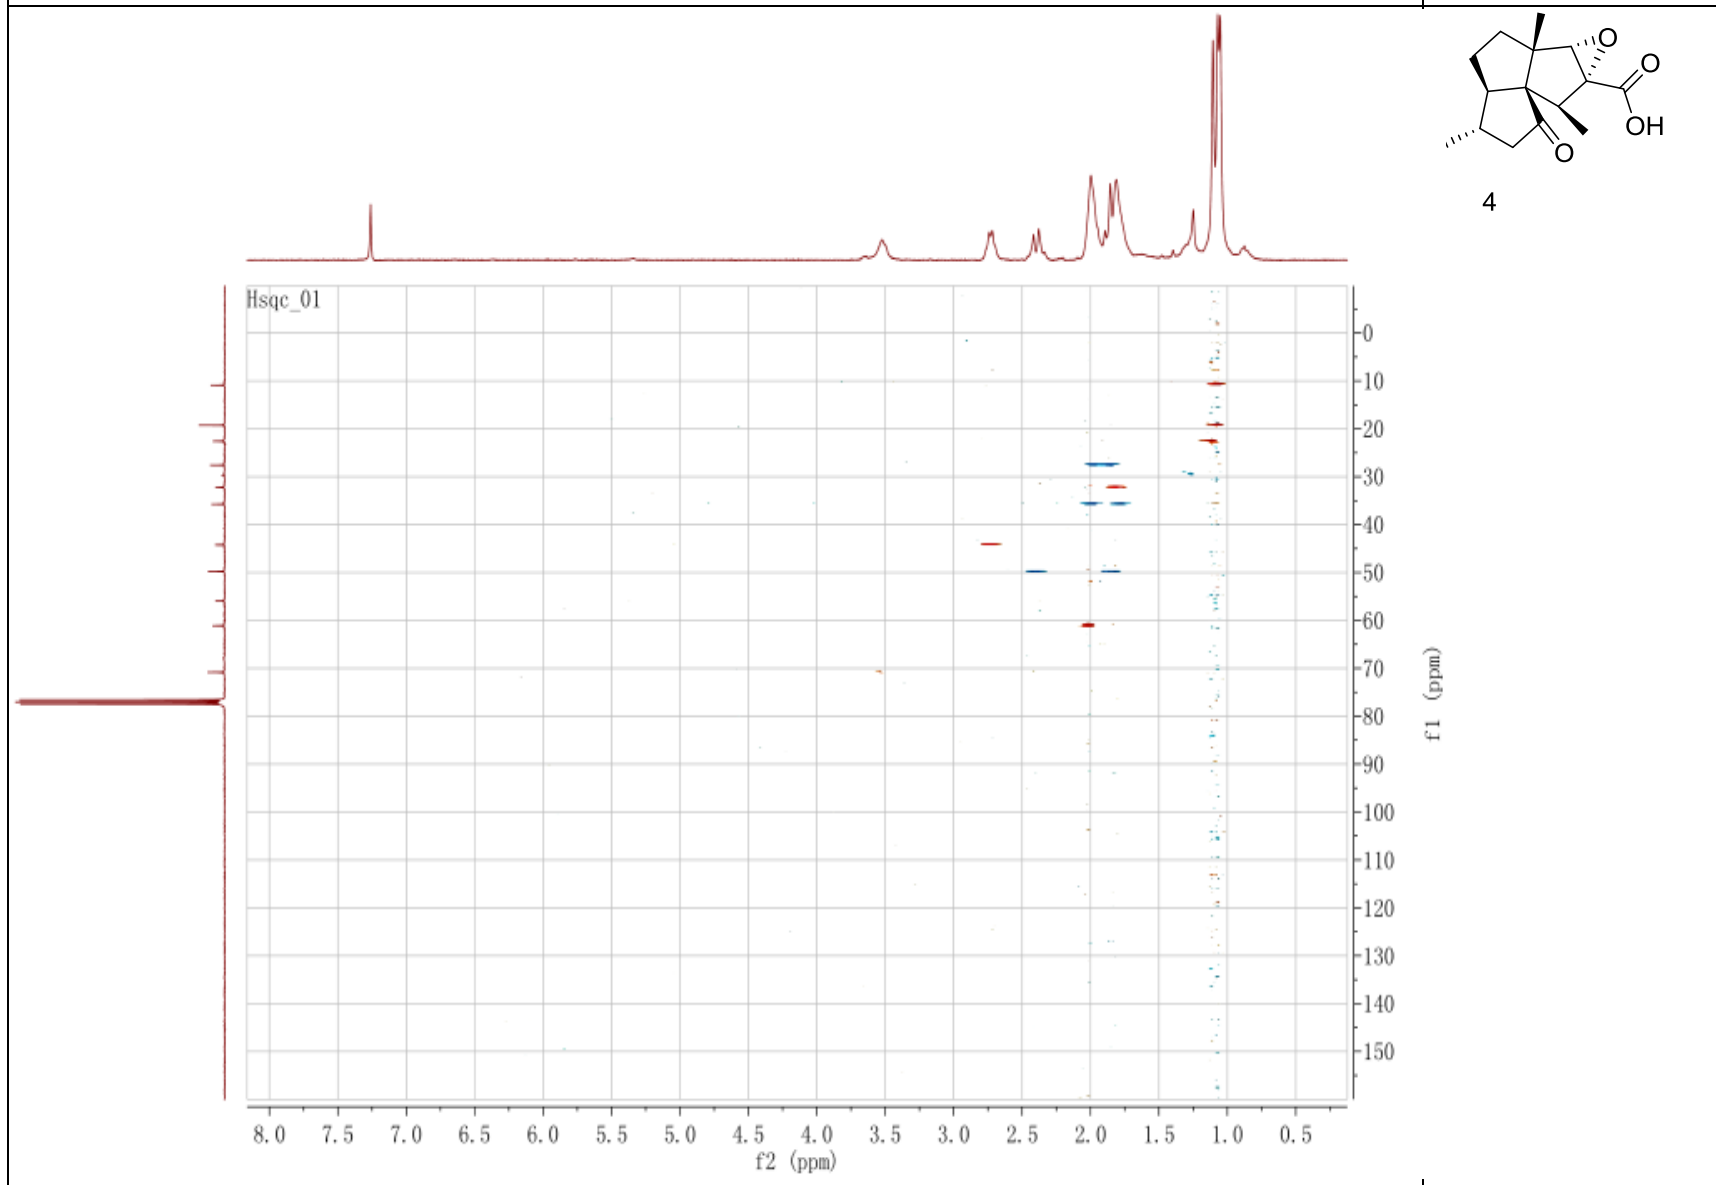

**Figure S13.** NOESY spectrum of compound **4**

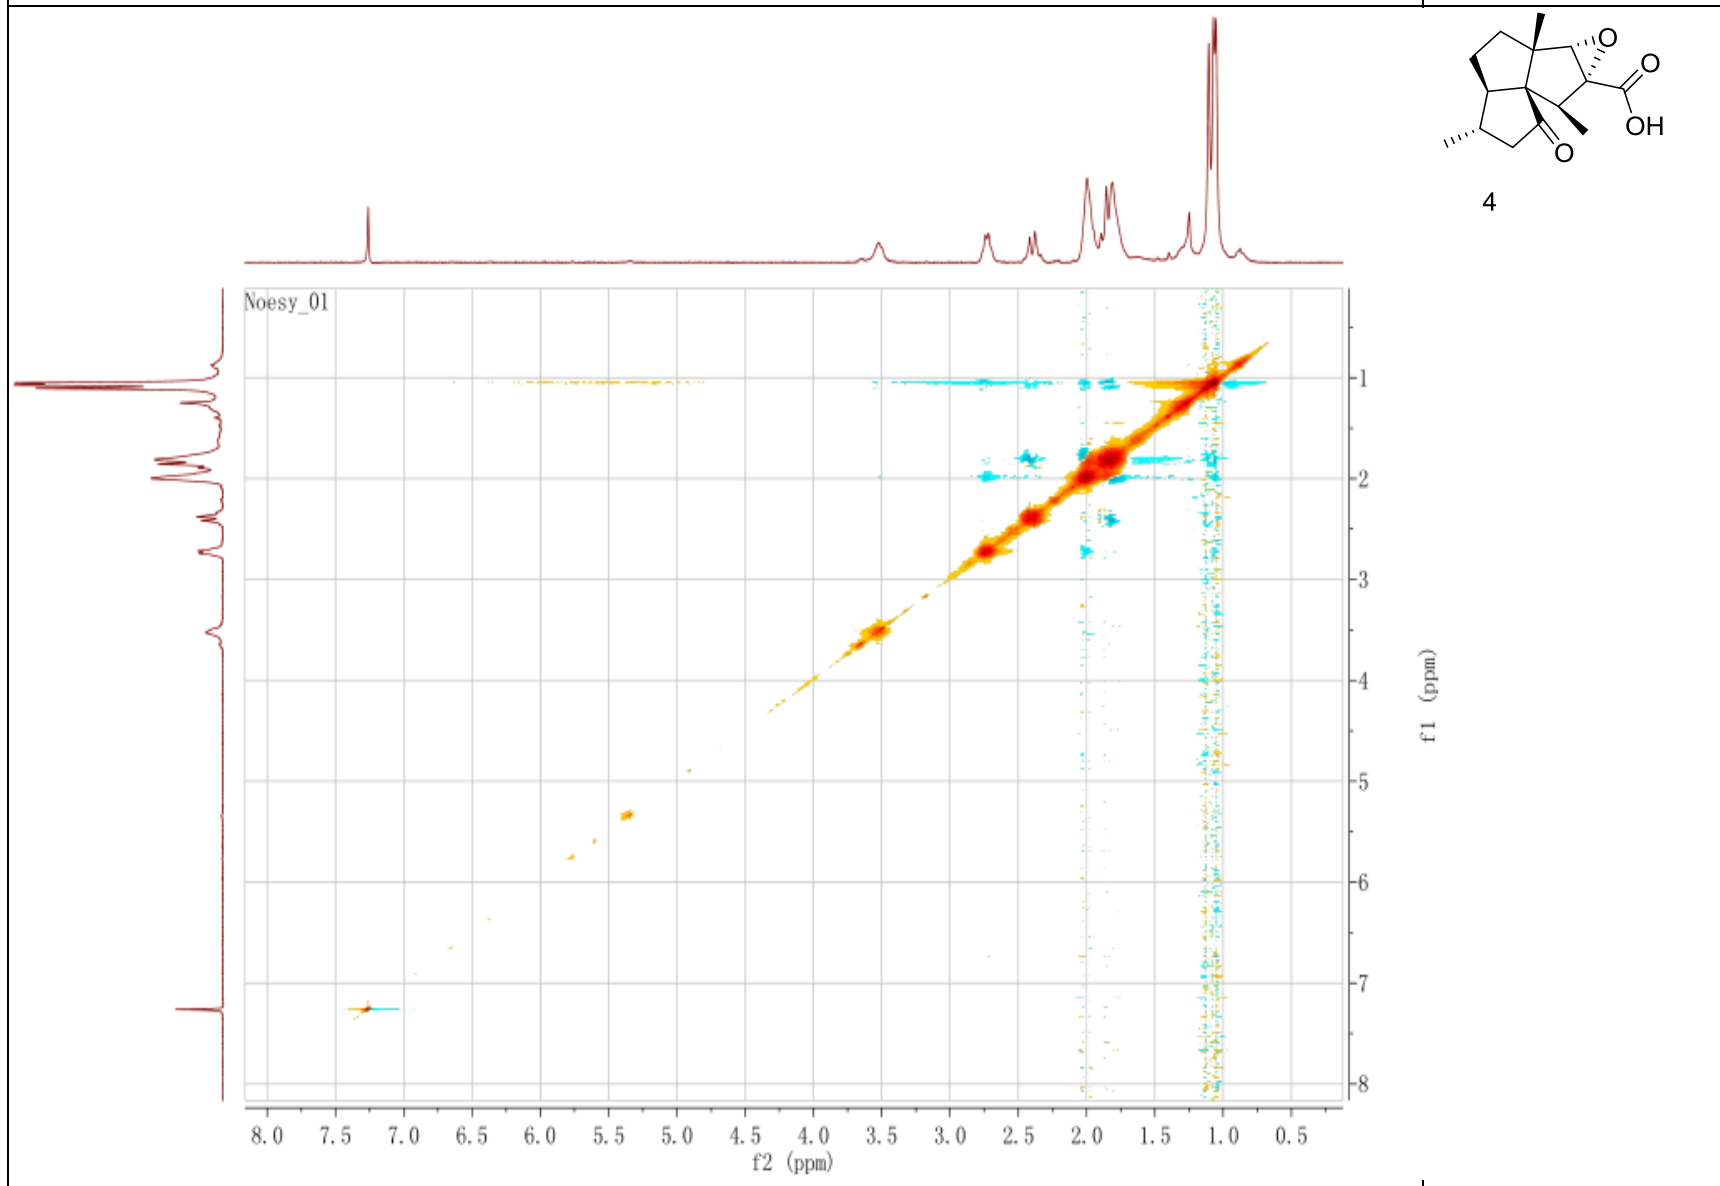

|  |  |
|--|--|
|  |  |
|--|--|

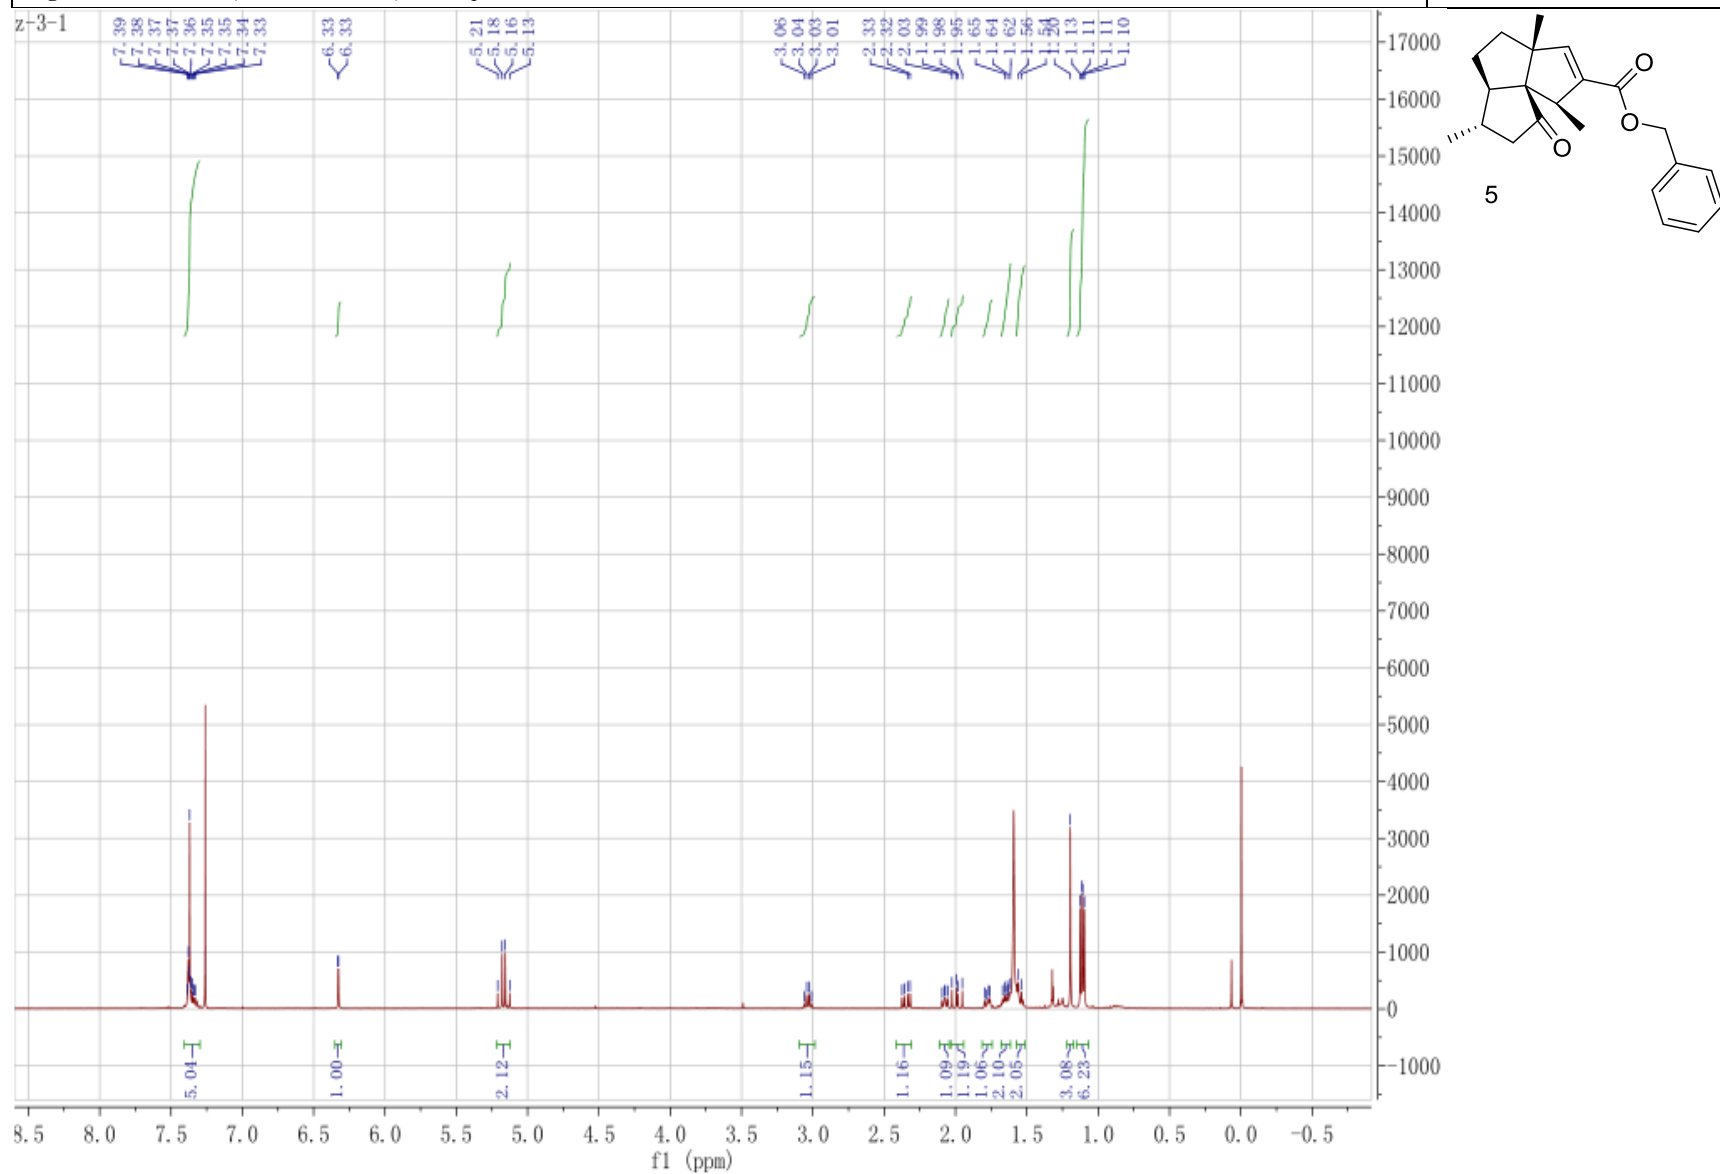



**Figure S15.**  $^{13}\text{C}$  NMR (100 MHz,  $\text{CDCl}_3$ ) of compound **5**

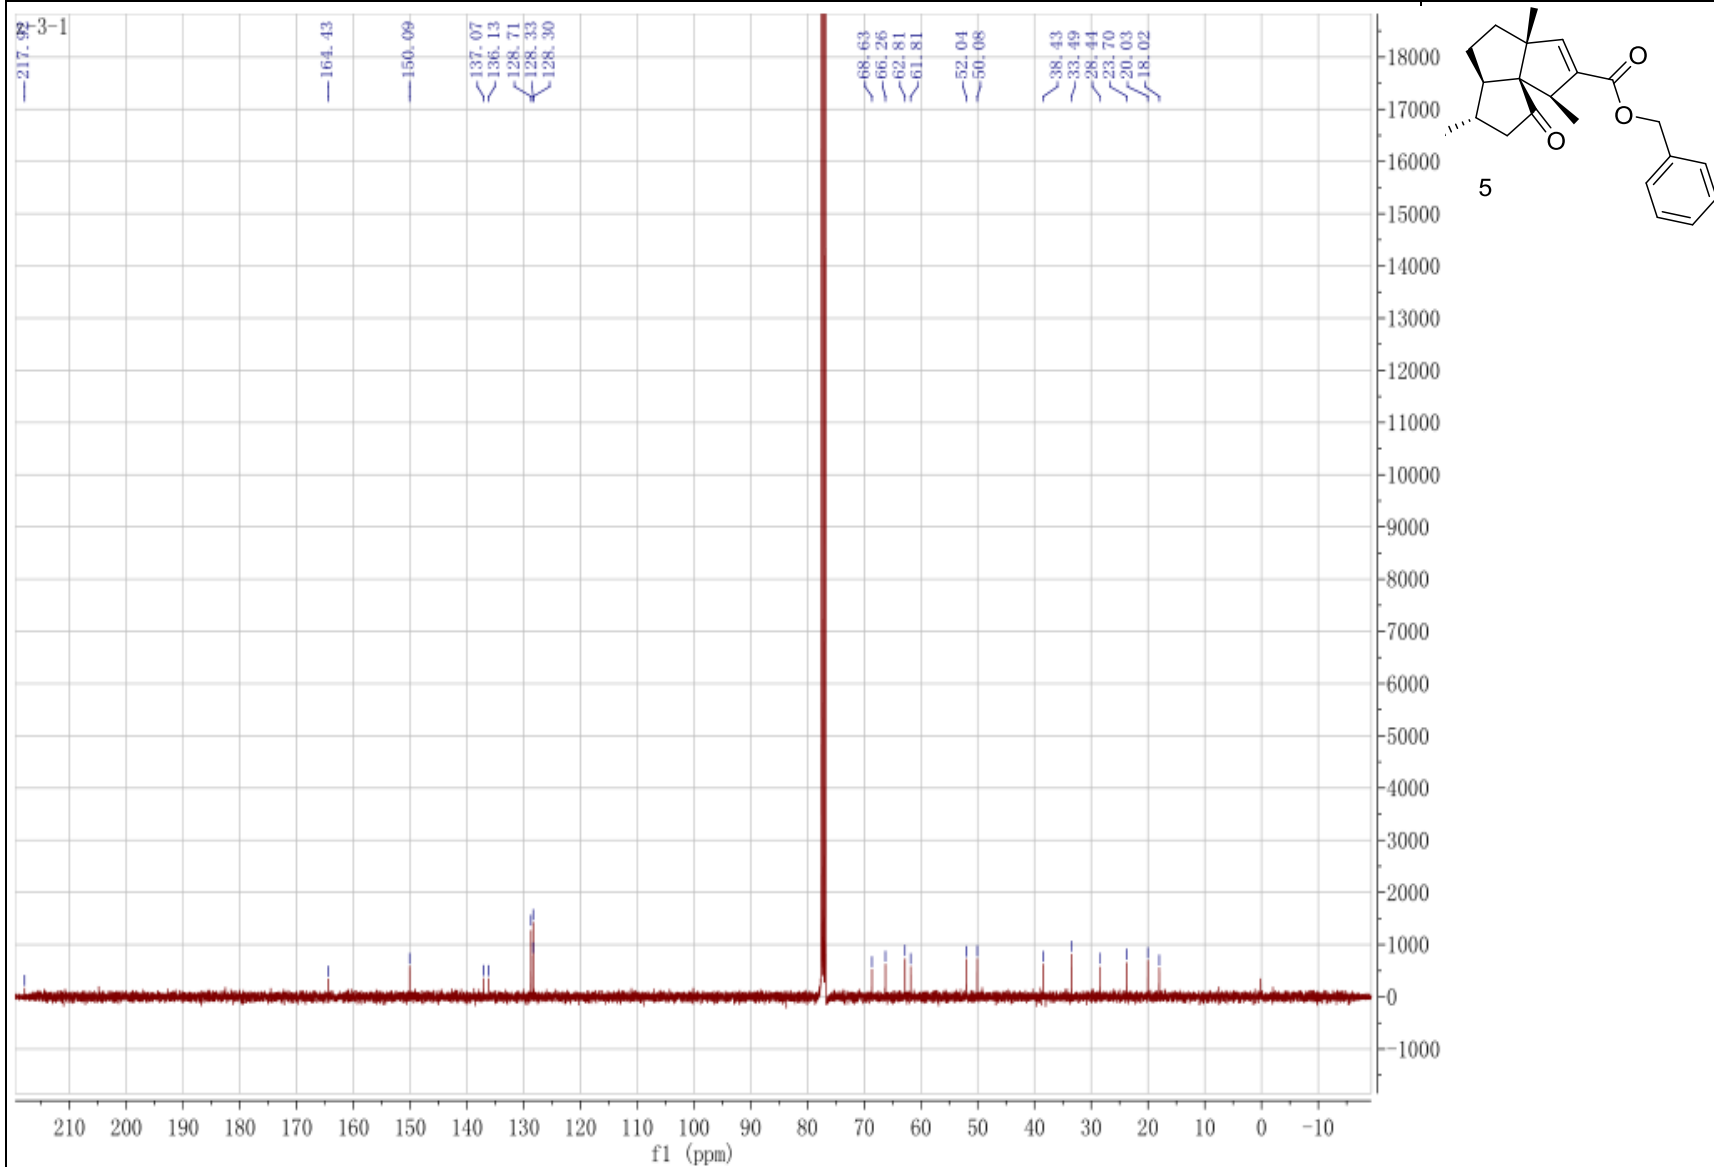

**Figure S16.**  $^1\text{H}$  NMR (300 MHz,  $\text{CDCl}_3$ ) of compound **6**

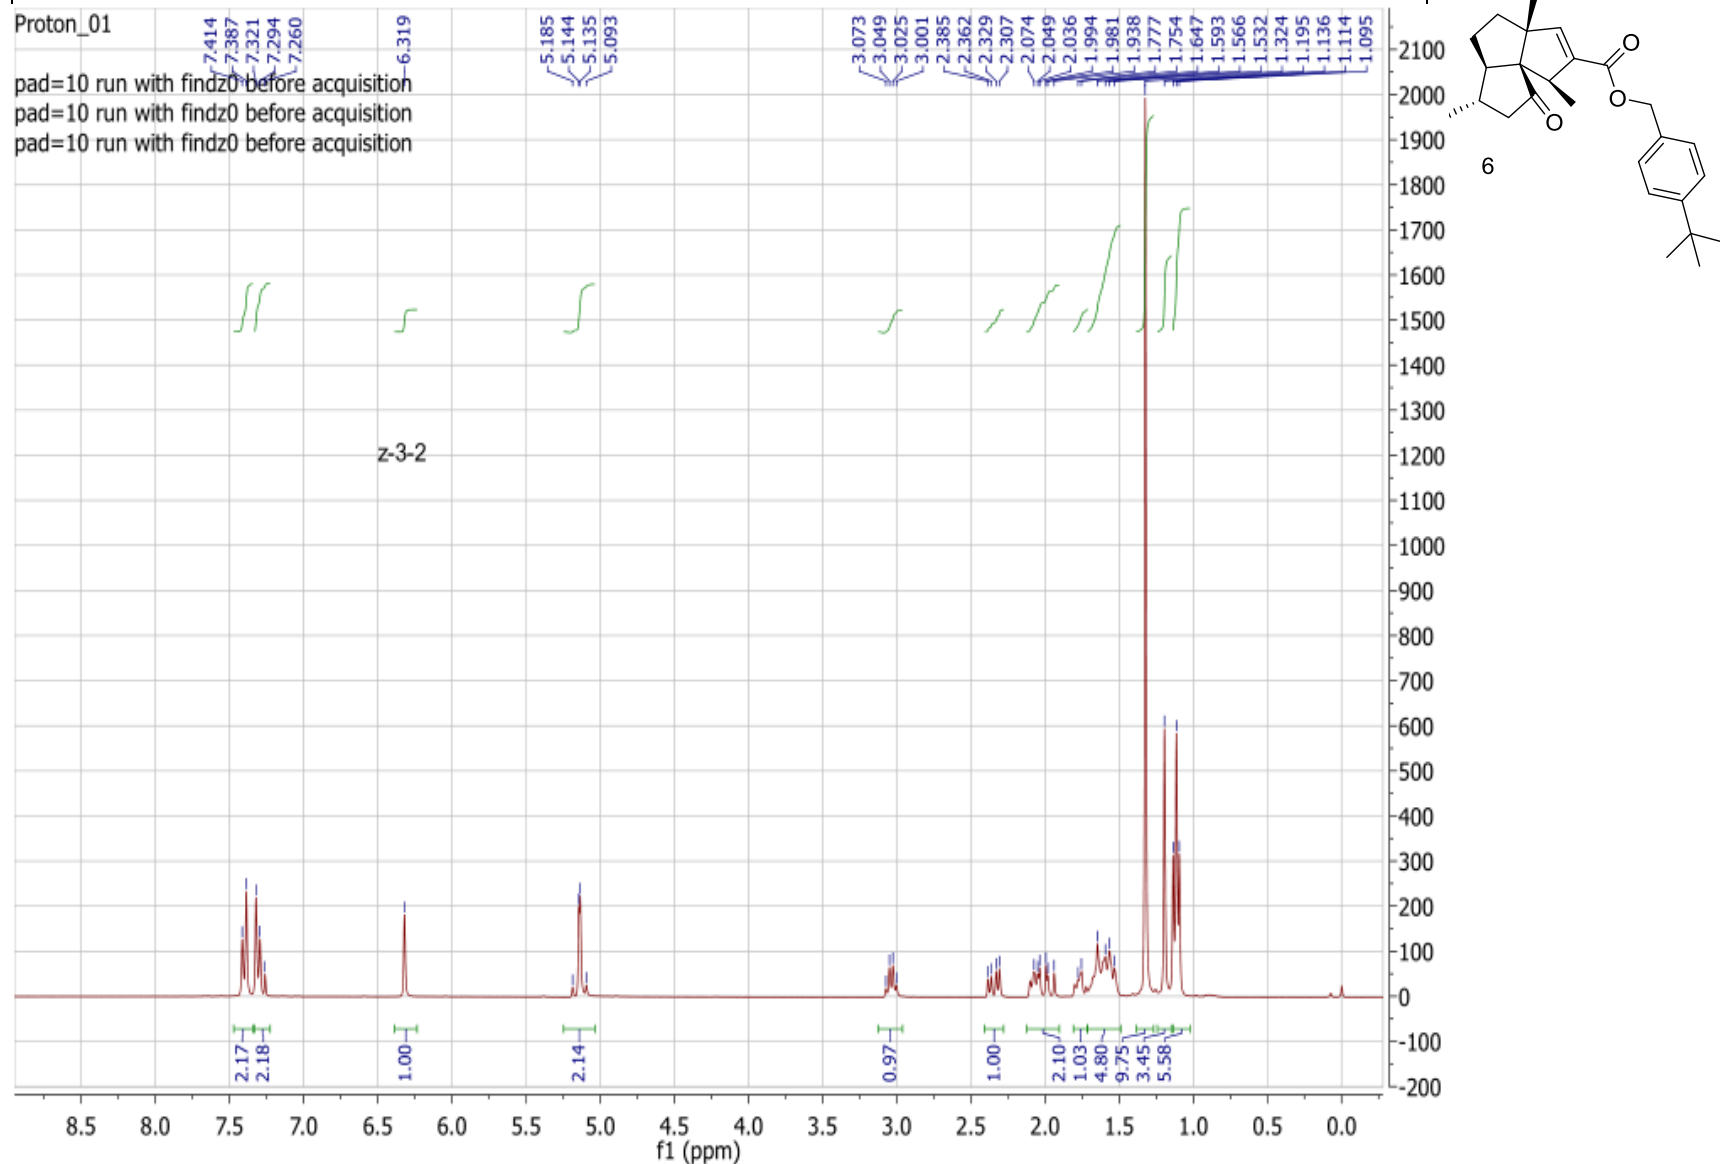

**Figure S17.**  $^{13}\text{C}$  NMR (75 MHz,  $\text{CDCl}_3$ ) of compound **6**

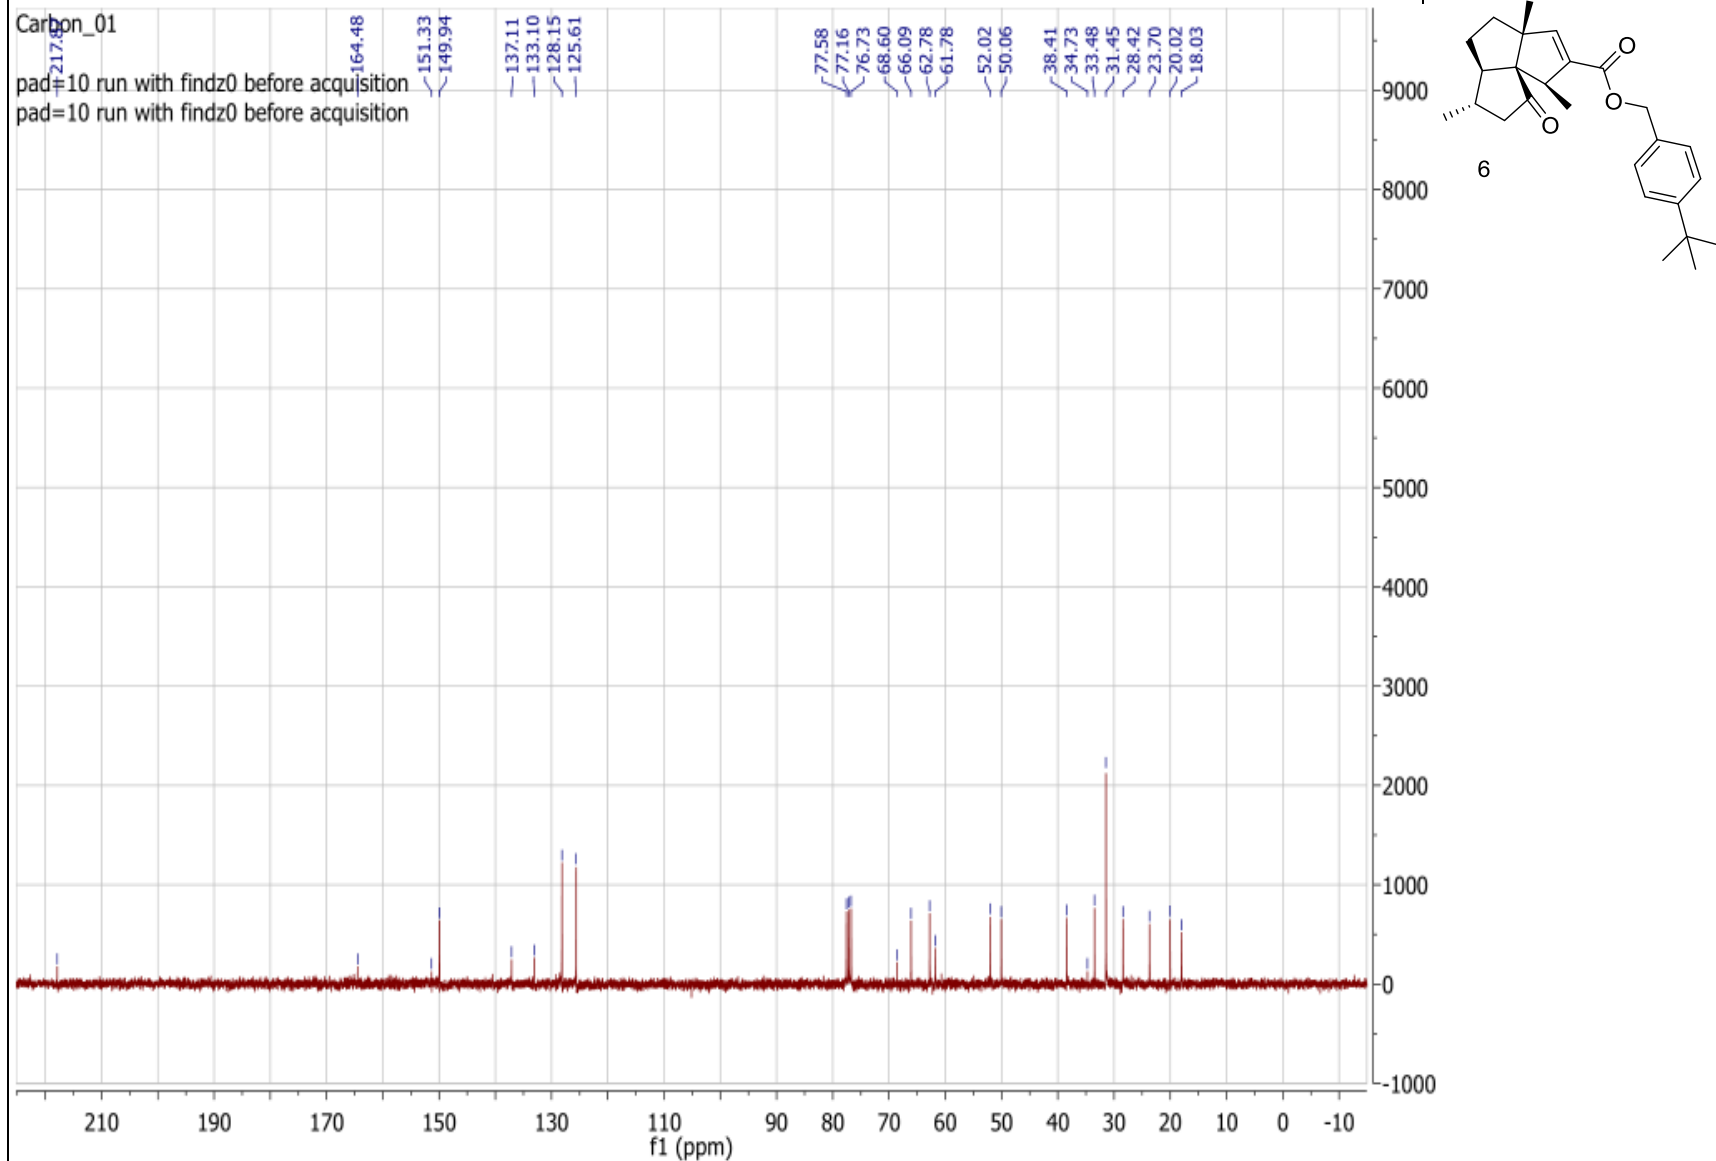

**Figure S18.**  $^1\text{H}$  NMR (300 MHz,  $\text{CDCl}_3$ ) of compound 7

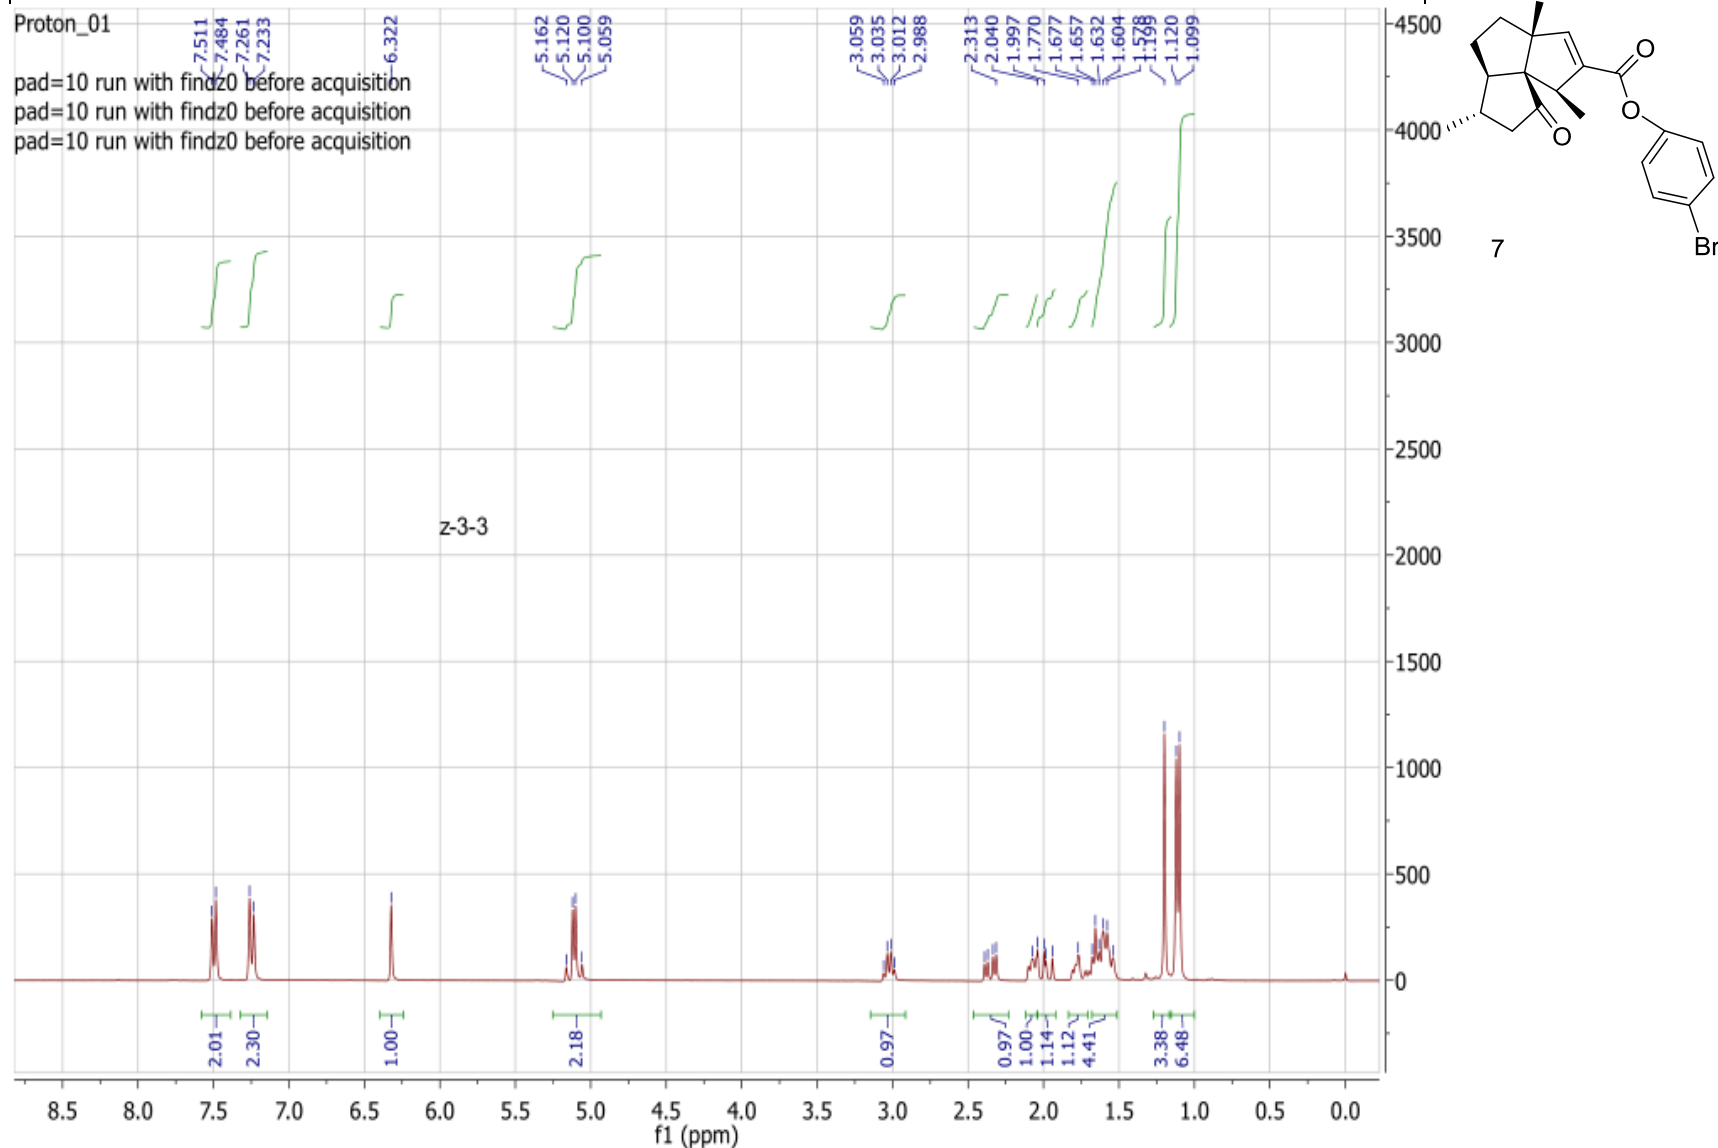

**Figure S19.**  $^{13}\text{C}$  NMR (75 MHz,  $\text{CDCl}_3$ ) of compound 7

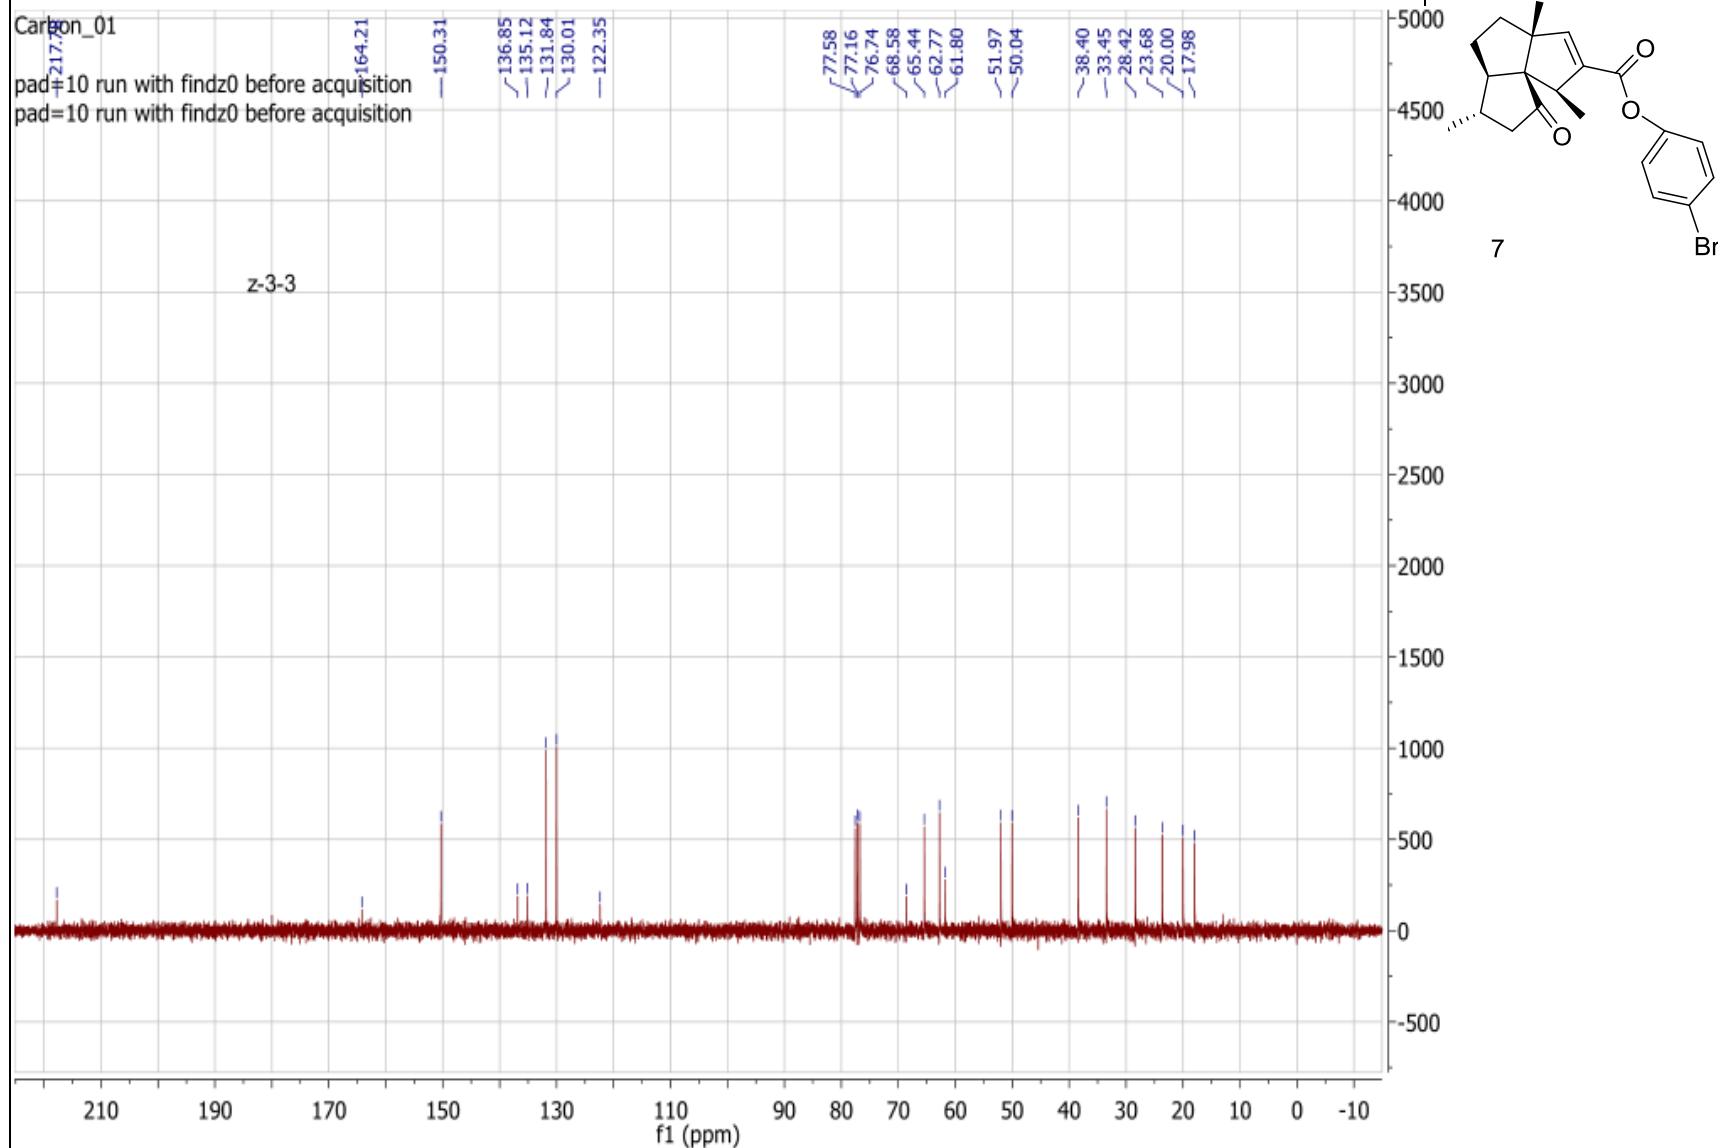

**Figure S20.**  $^1\text{H}$  NMR (300 MHz,  $\text{CDCl}_3$ ) of compound **8**

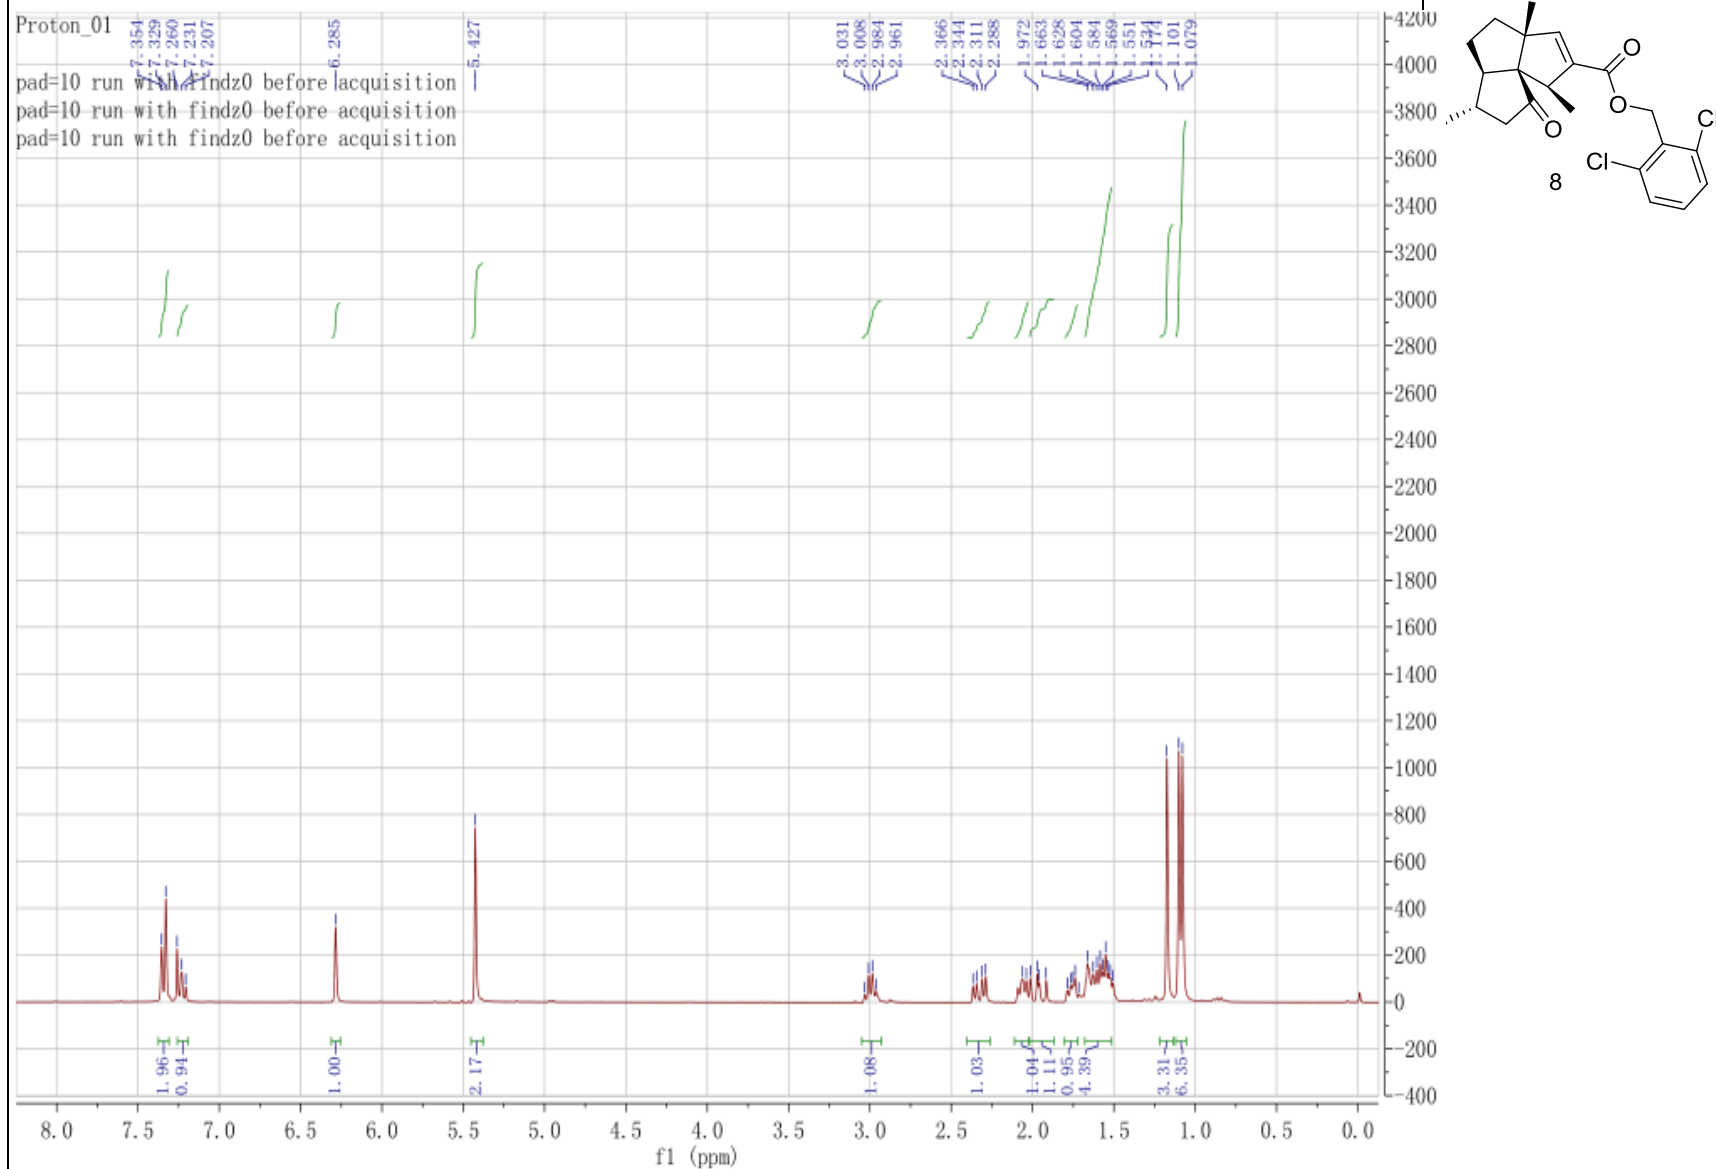

**Figure S21.**  $^{13}\text{C}$  NMR (75 MHz,  $\text{CDCl}_3$ ) of compound **8**

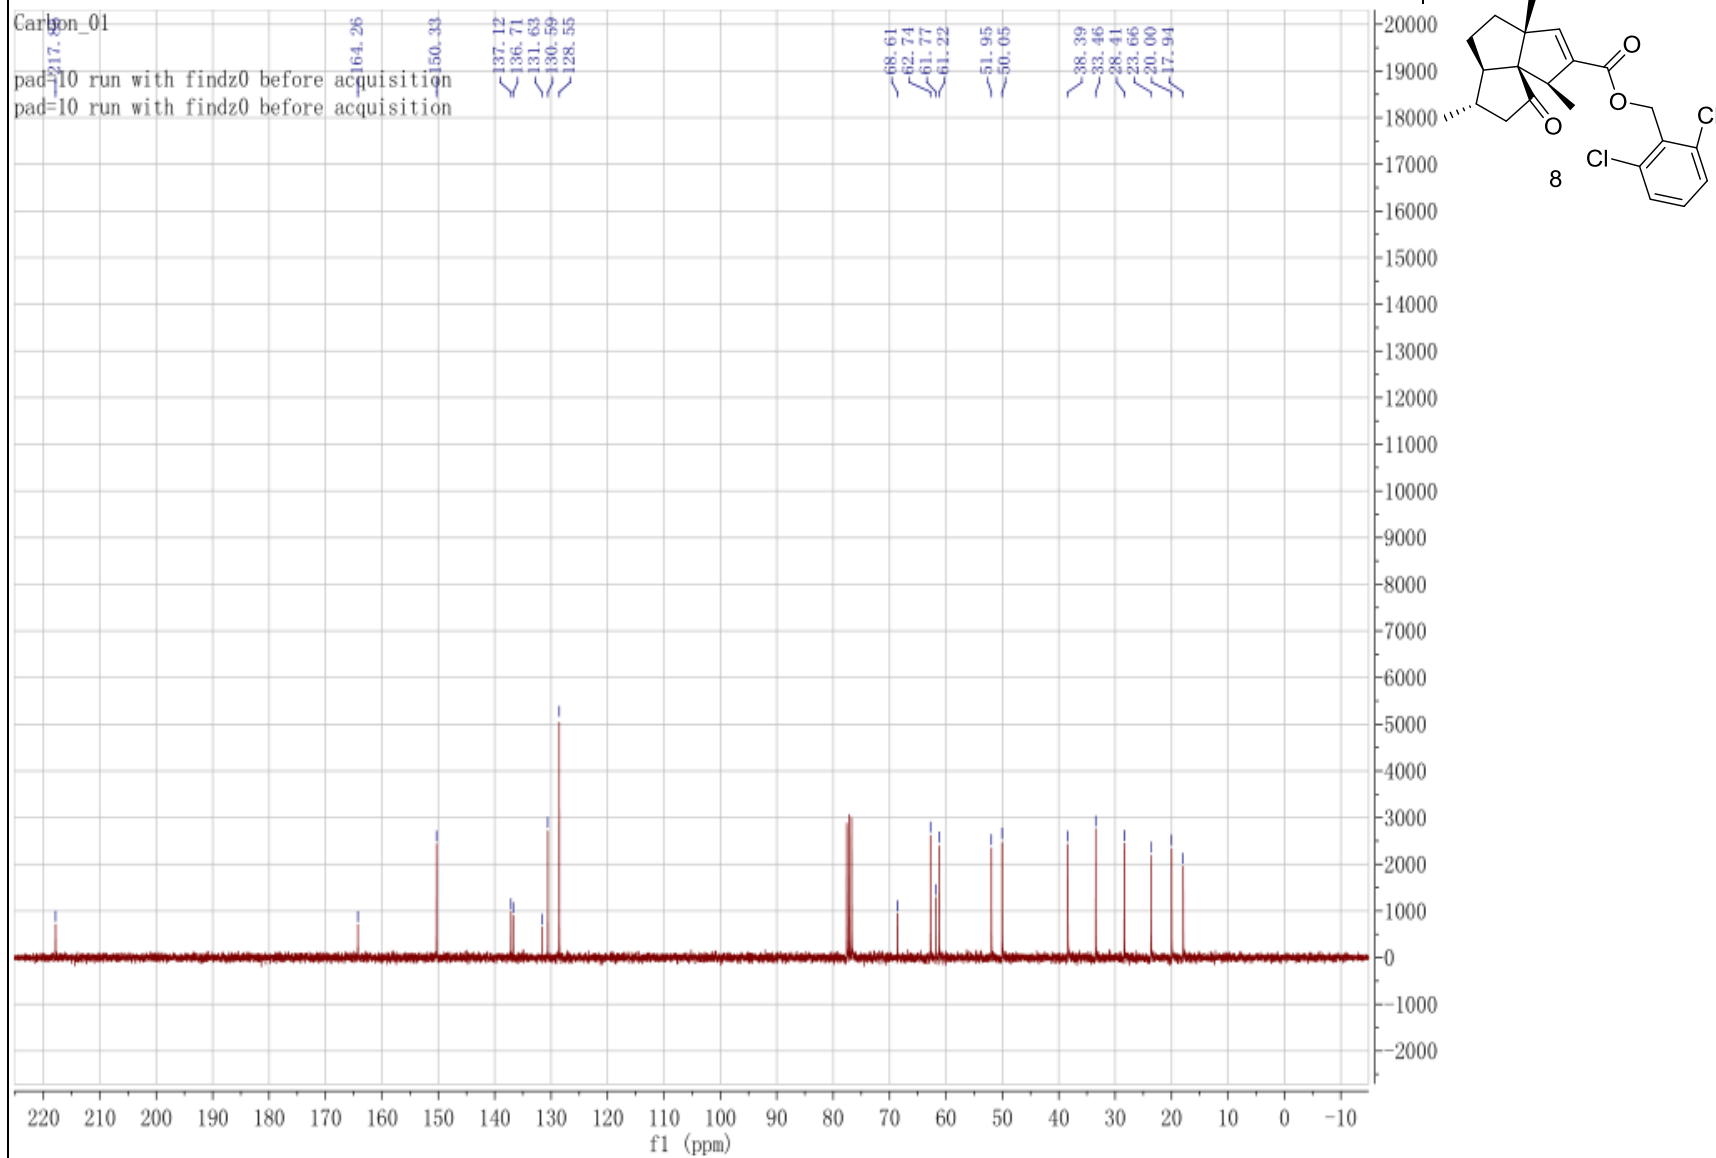

**Figure S22.**  $^1\text{H}$  NMR (300 MHz,  $\text{CDCl}_3$ ) of compound **9**

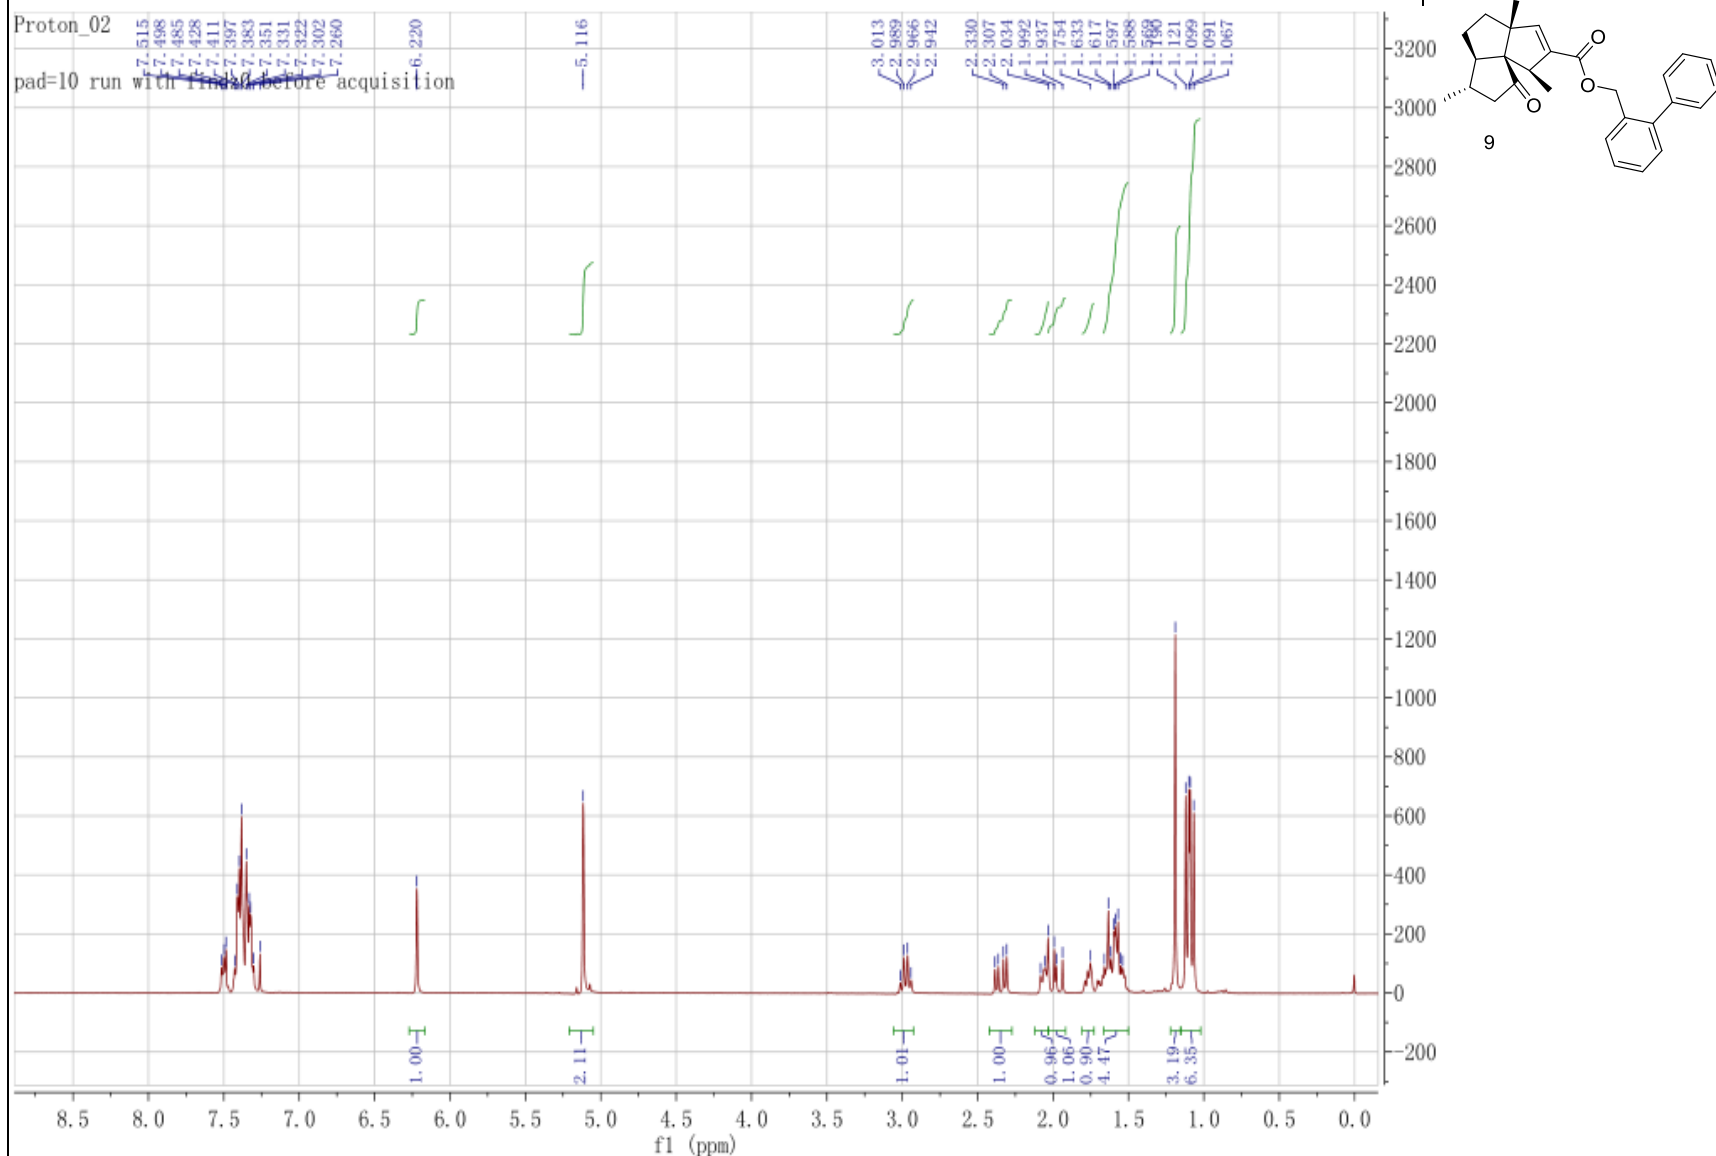



**Figure S23.**  $^{13}\text{C}$  NMR (75 MHz,  $\text{CDCl}_3$ ) of compound **9**

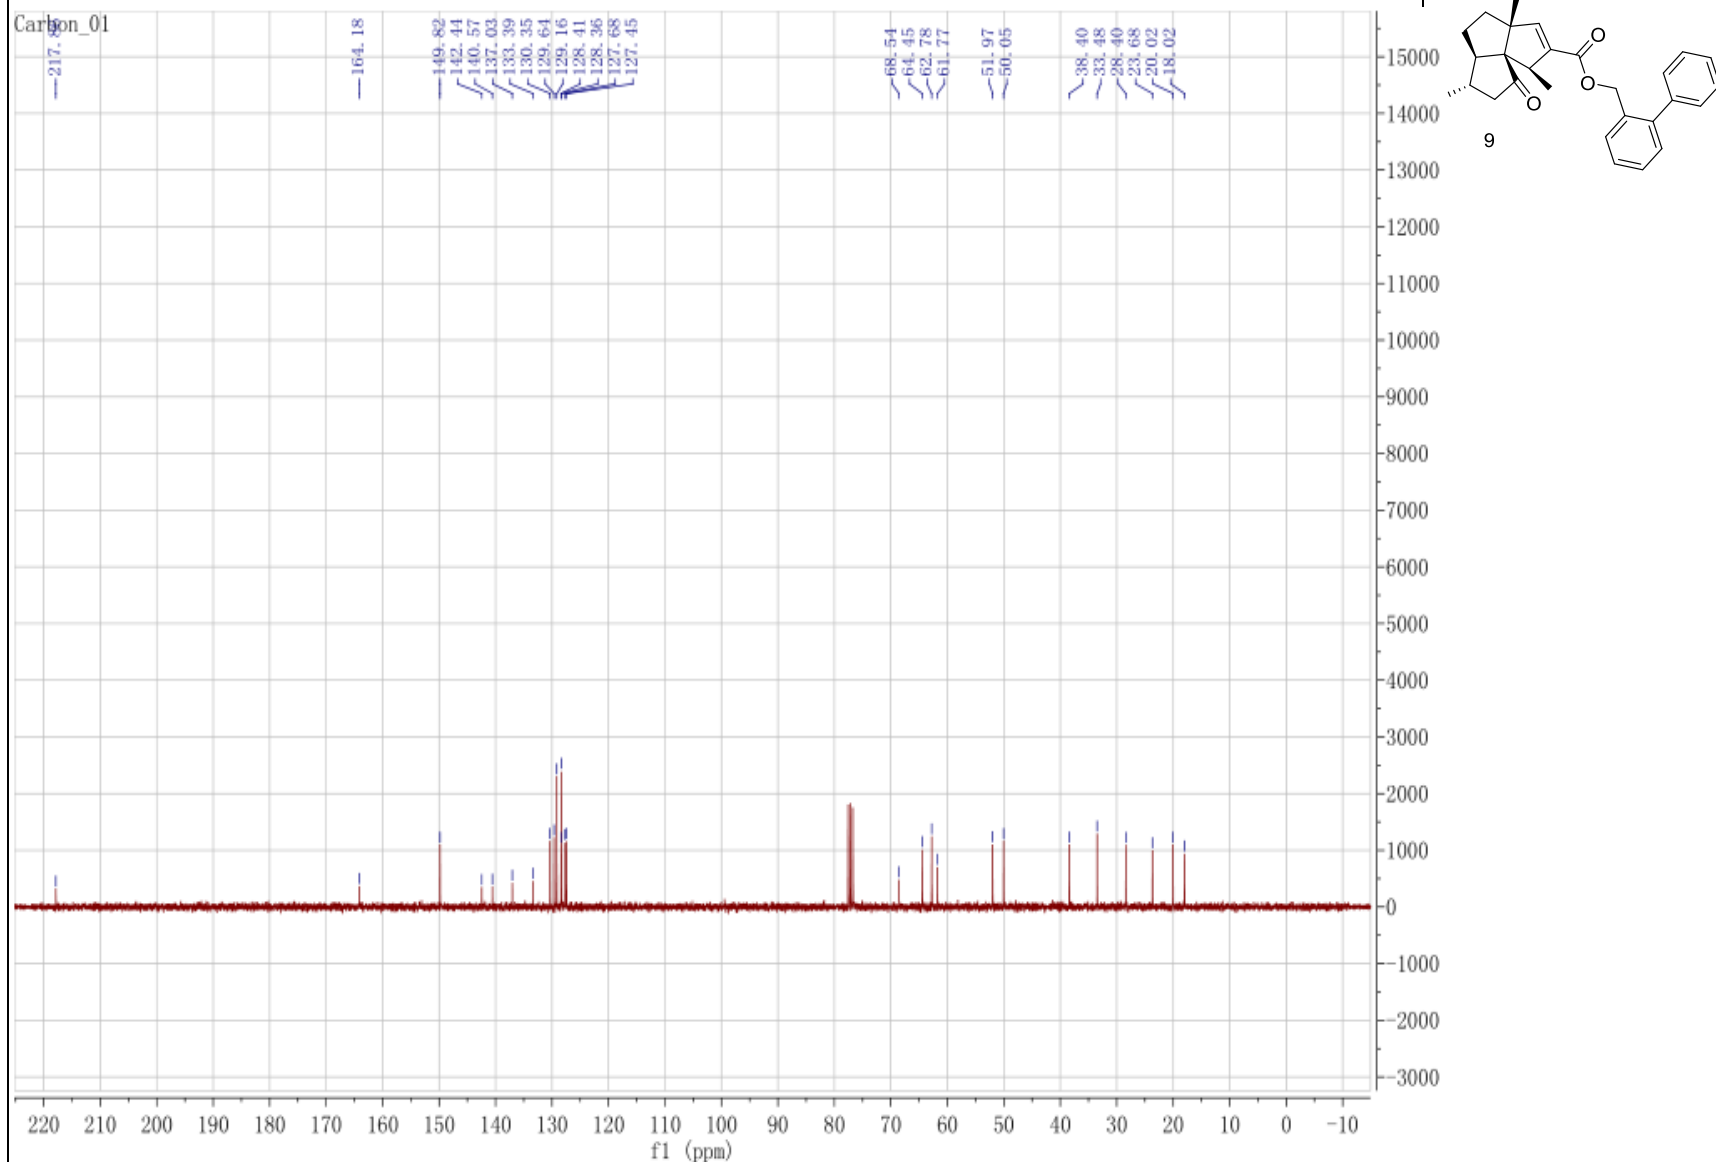

**Figure S24.**  $^1\text{H}$  NMR (300 MHz,  $\text{CDCl}_3$ ) of compound **10**

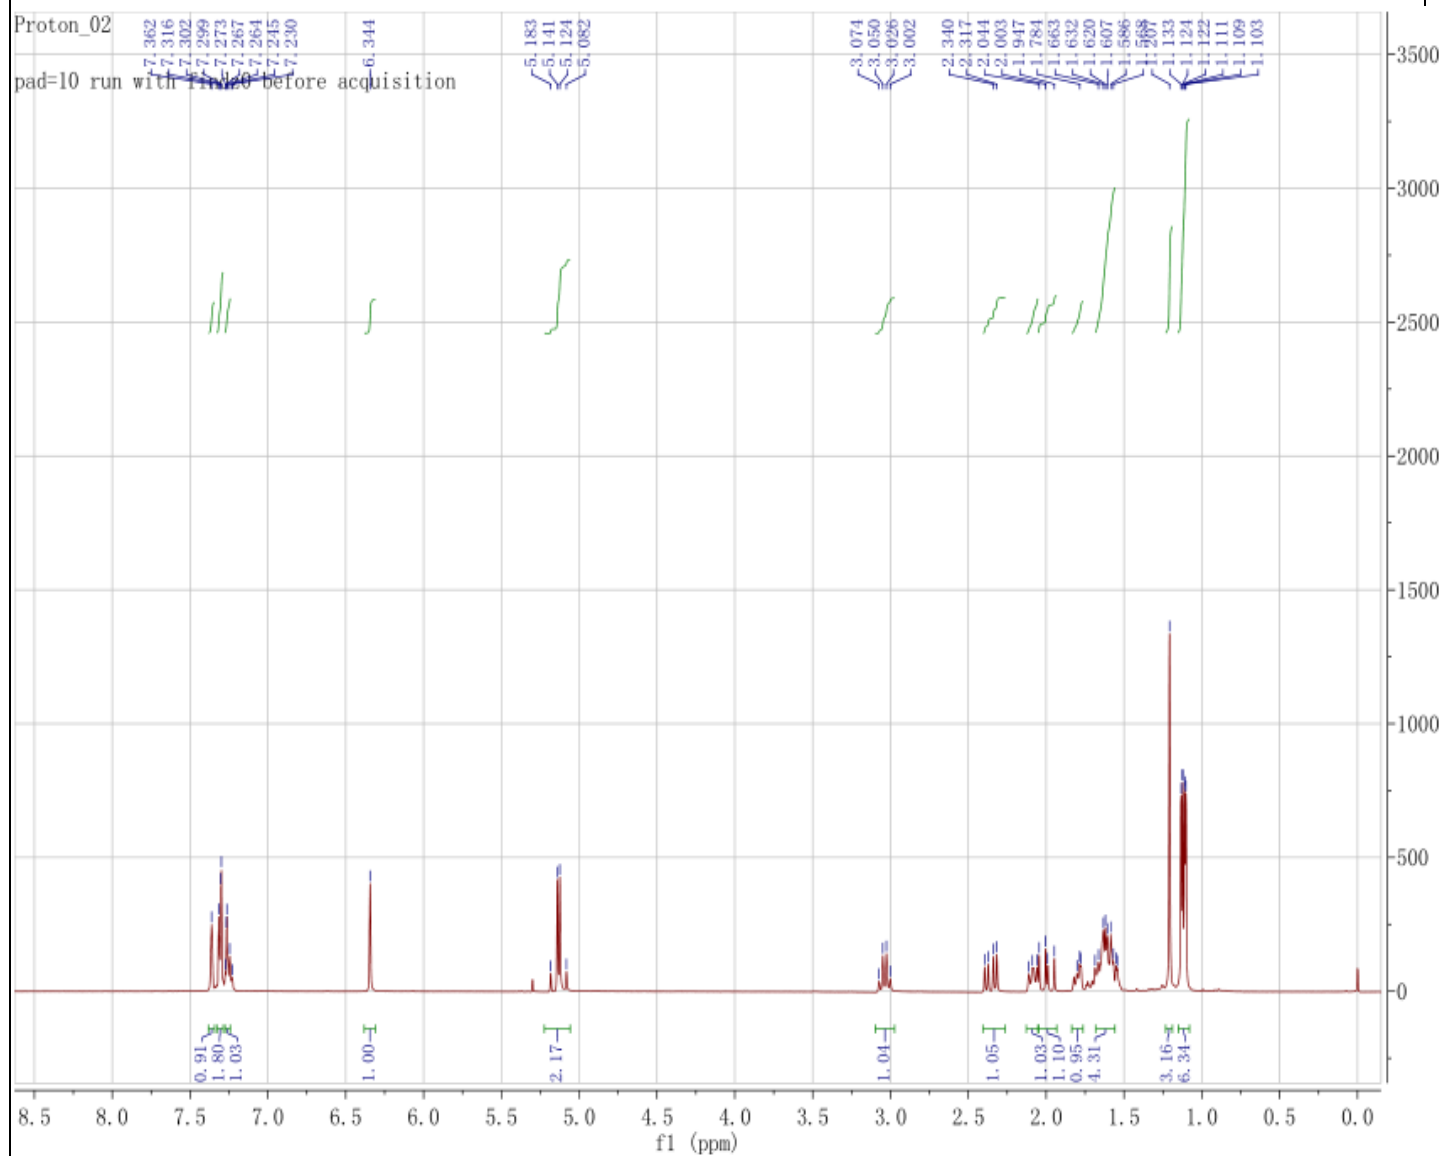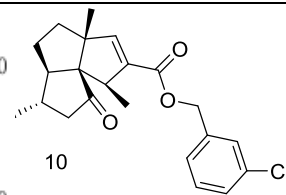

**Figure S25.**  $^{13}\text{C}$  NMR (75 MHz,  $\text{CDCl}_3$ ) of compound **10**

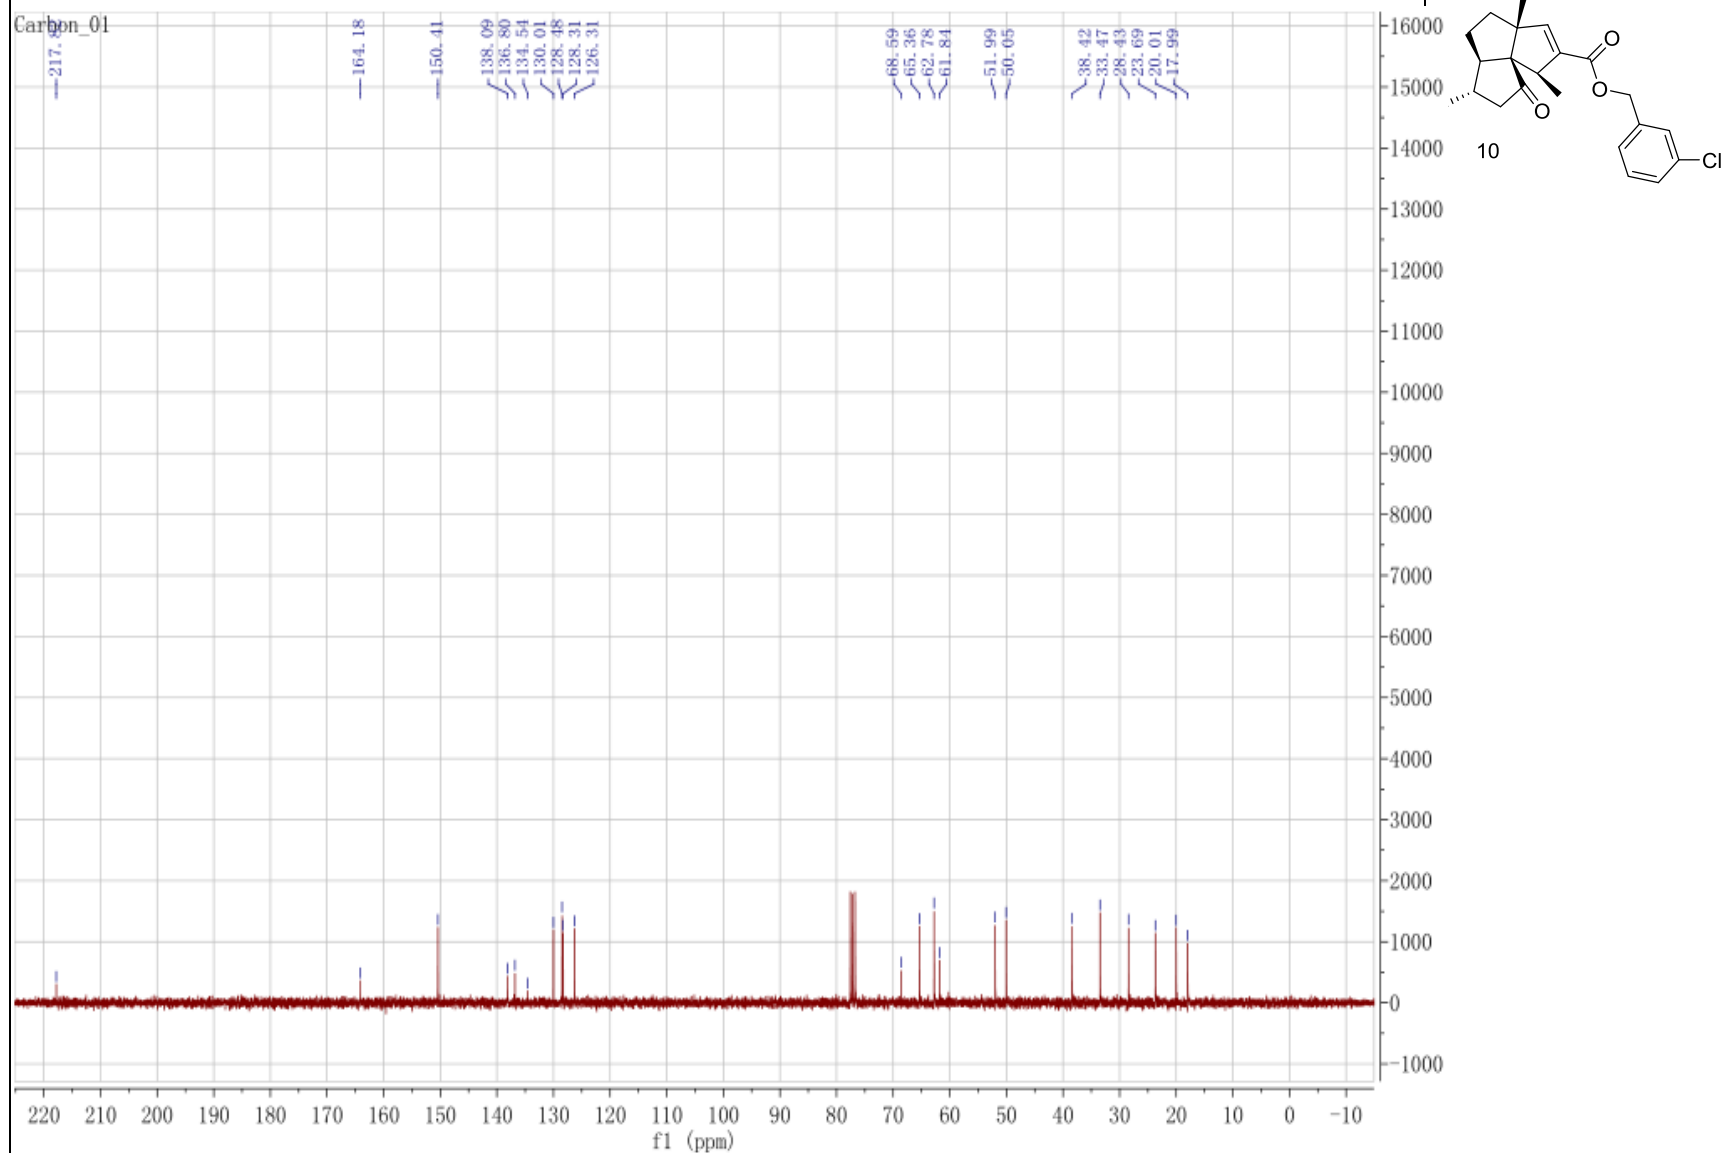

**Figure S26.**  $^1\text{H}$  NMR (300 MHz,  $\text{CDCl}_3$ ) of compound **11**

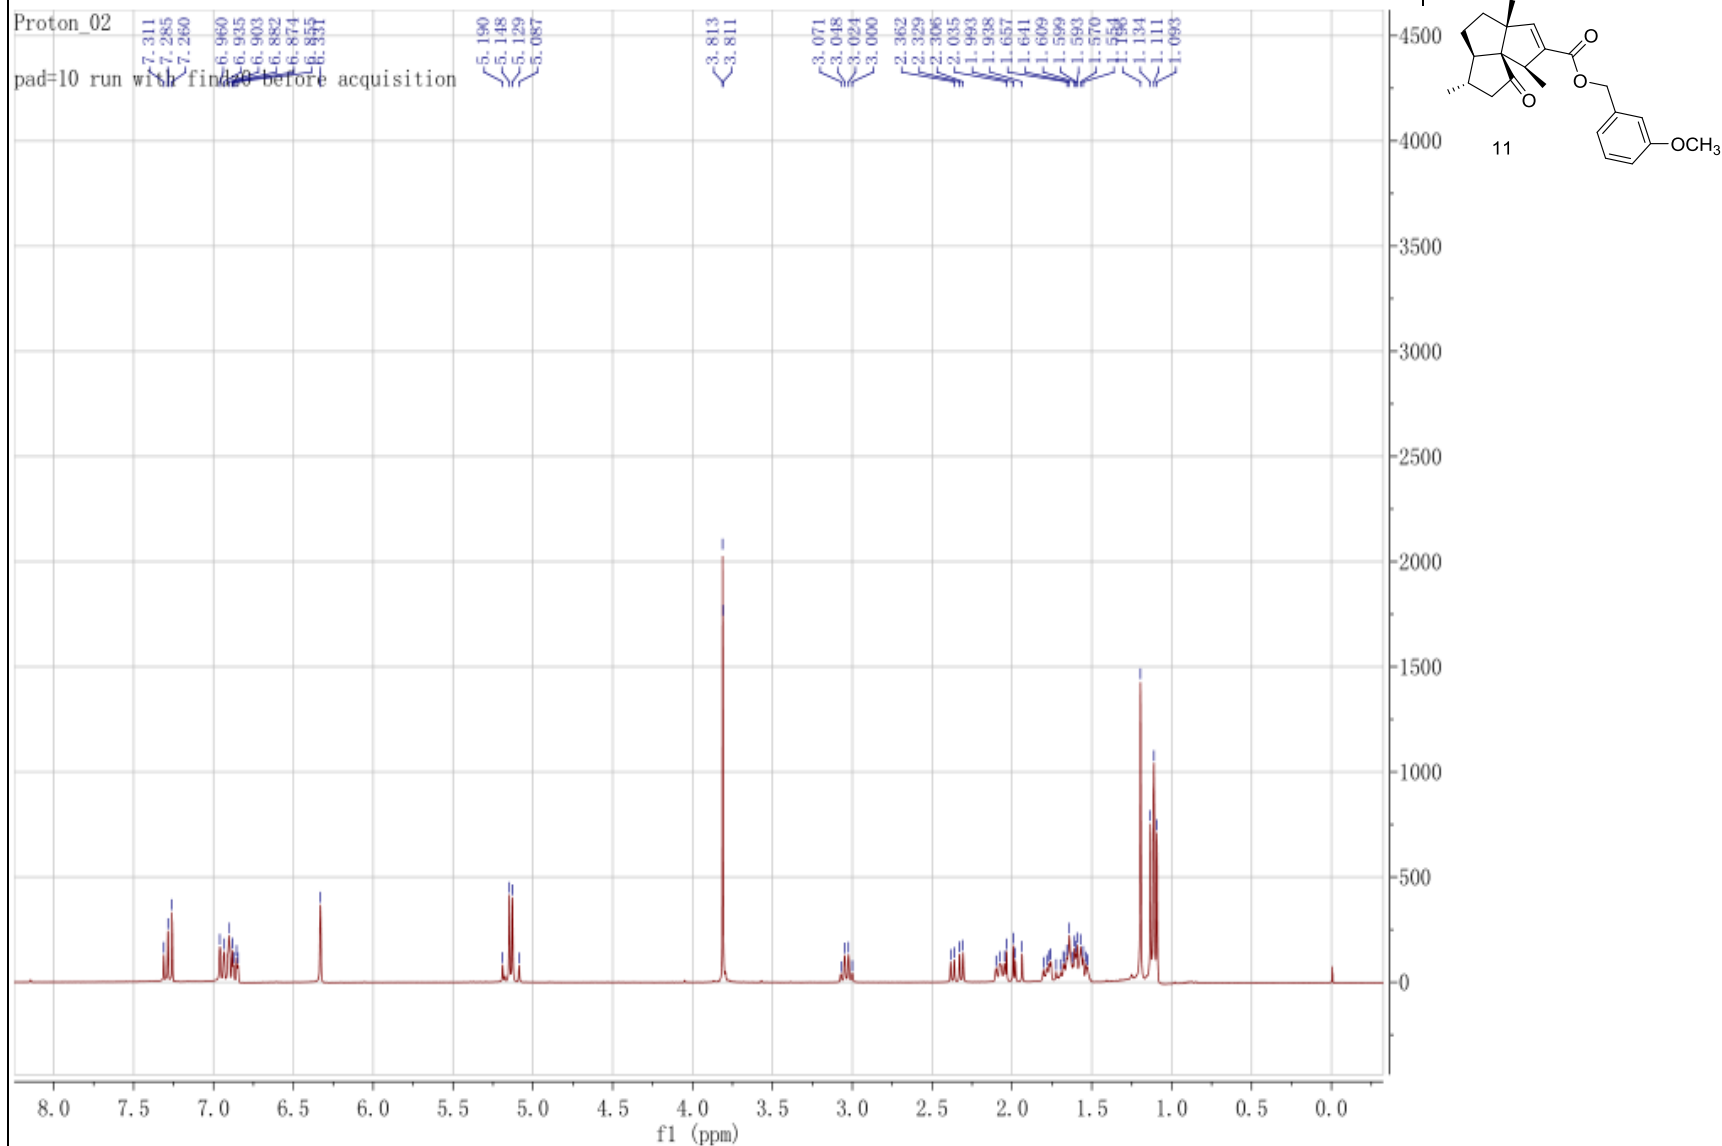

**Figure S27.**  $^{13}\text{C}$  NMR (75 MHz,  $\text{CDCl}_3$ ) of compound **11**

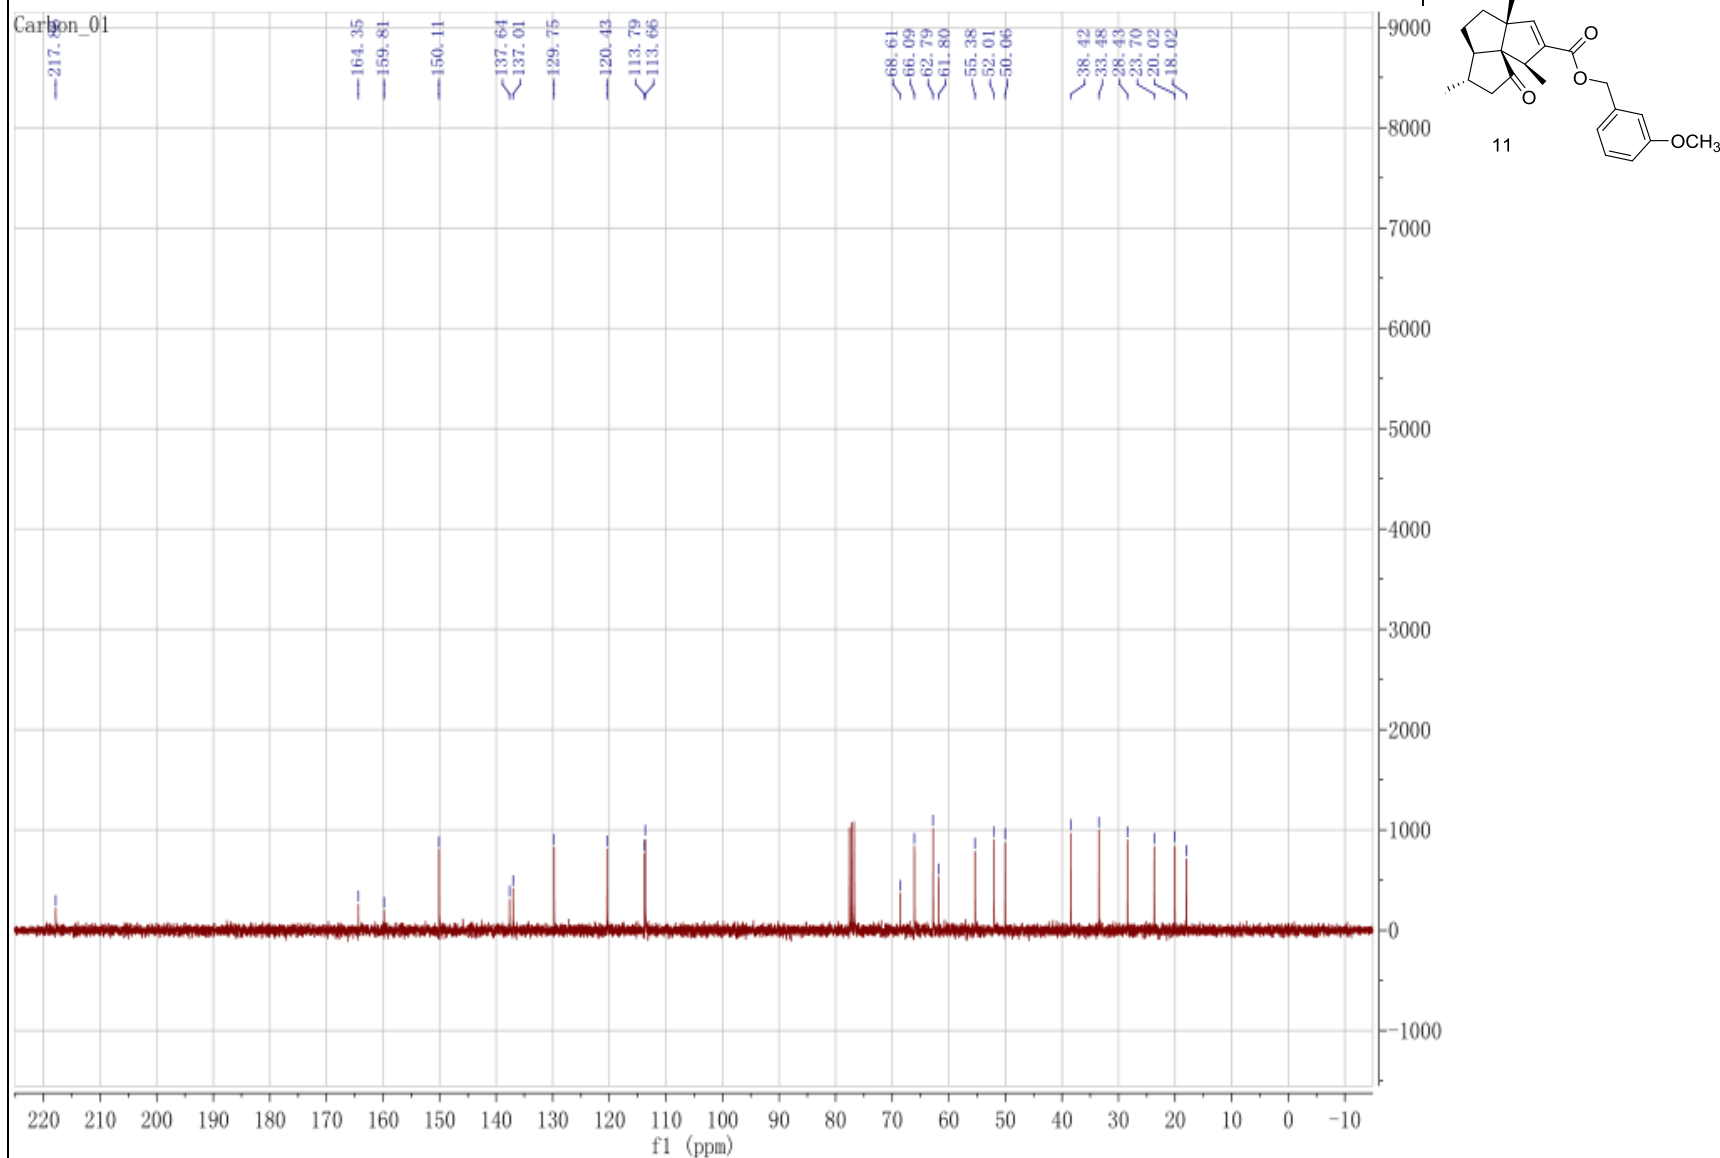

**Figure S28.**  $^1\text{H}$  NMR (300 MHz,  $\text{CDCl}_3$ ) of compound **12**

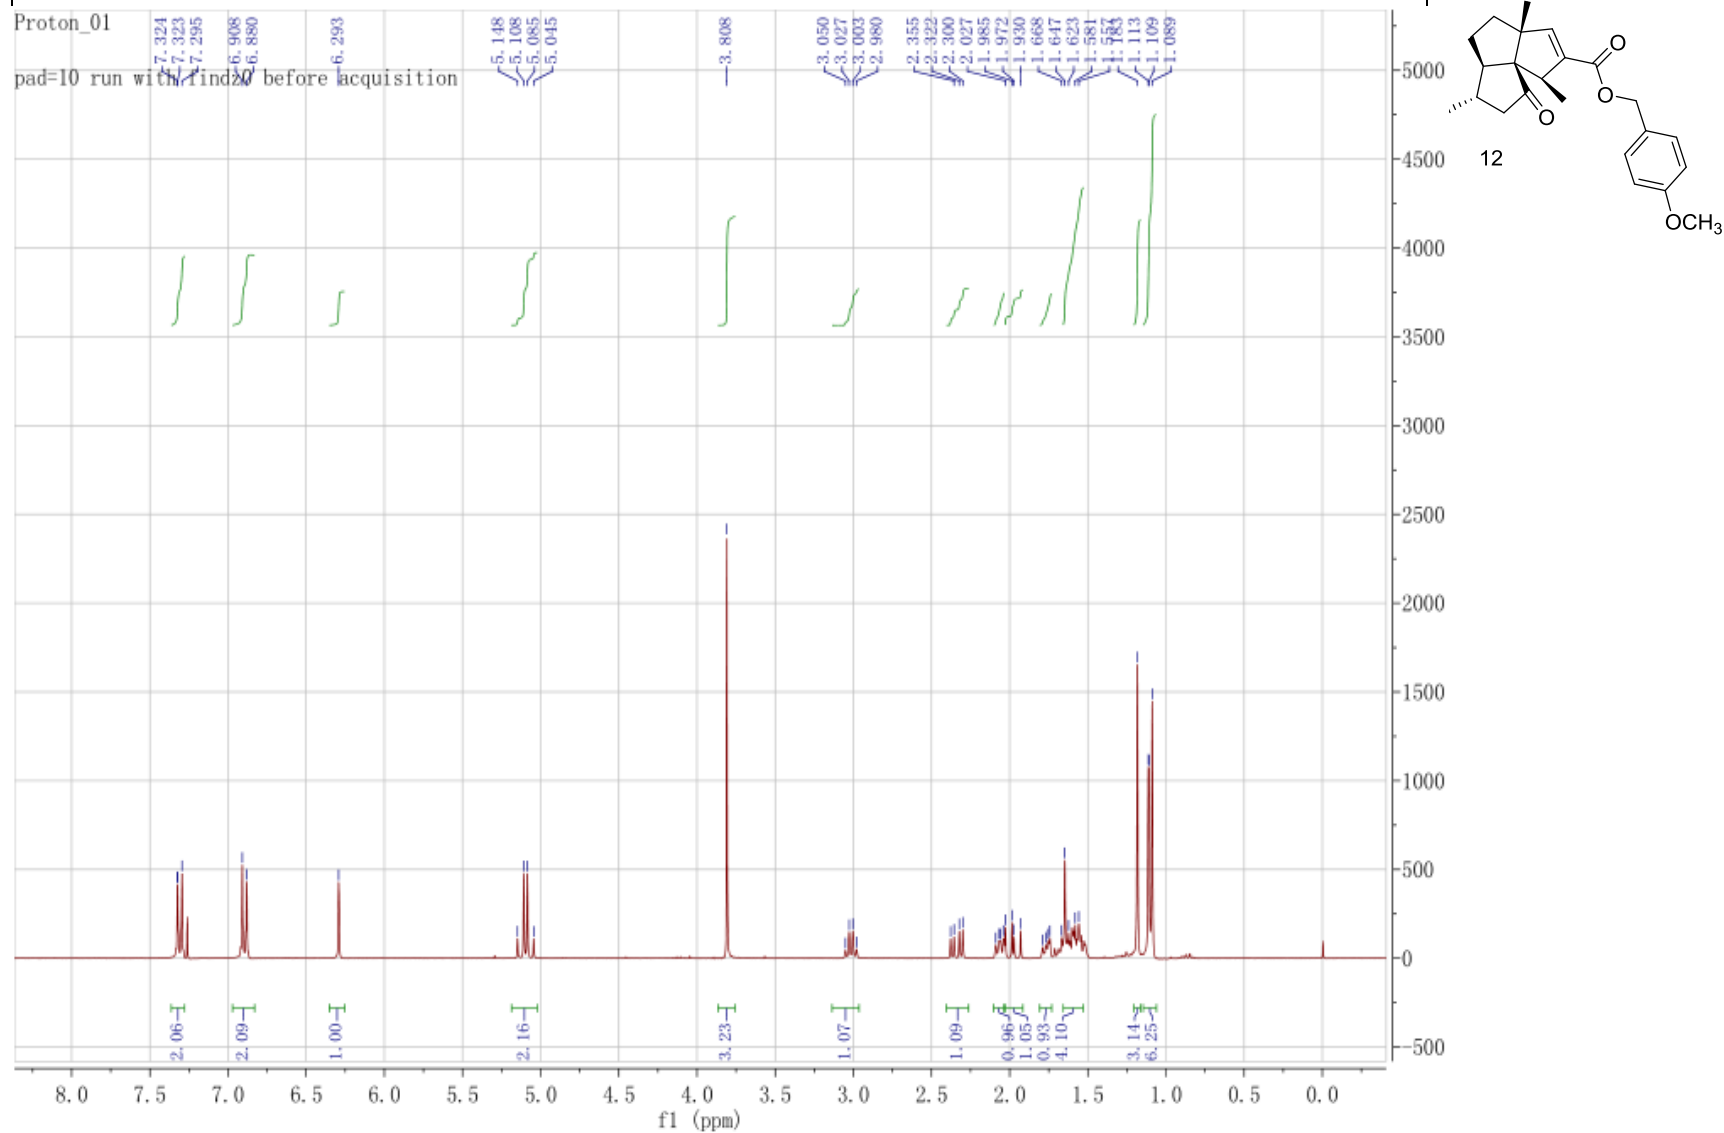

**Figure S29.**  $^{13}\text{C}$  NMR (75 MHz,  $\text{CDCl}_3$ ) of compound **12**

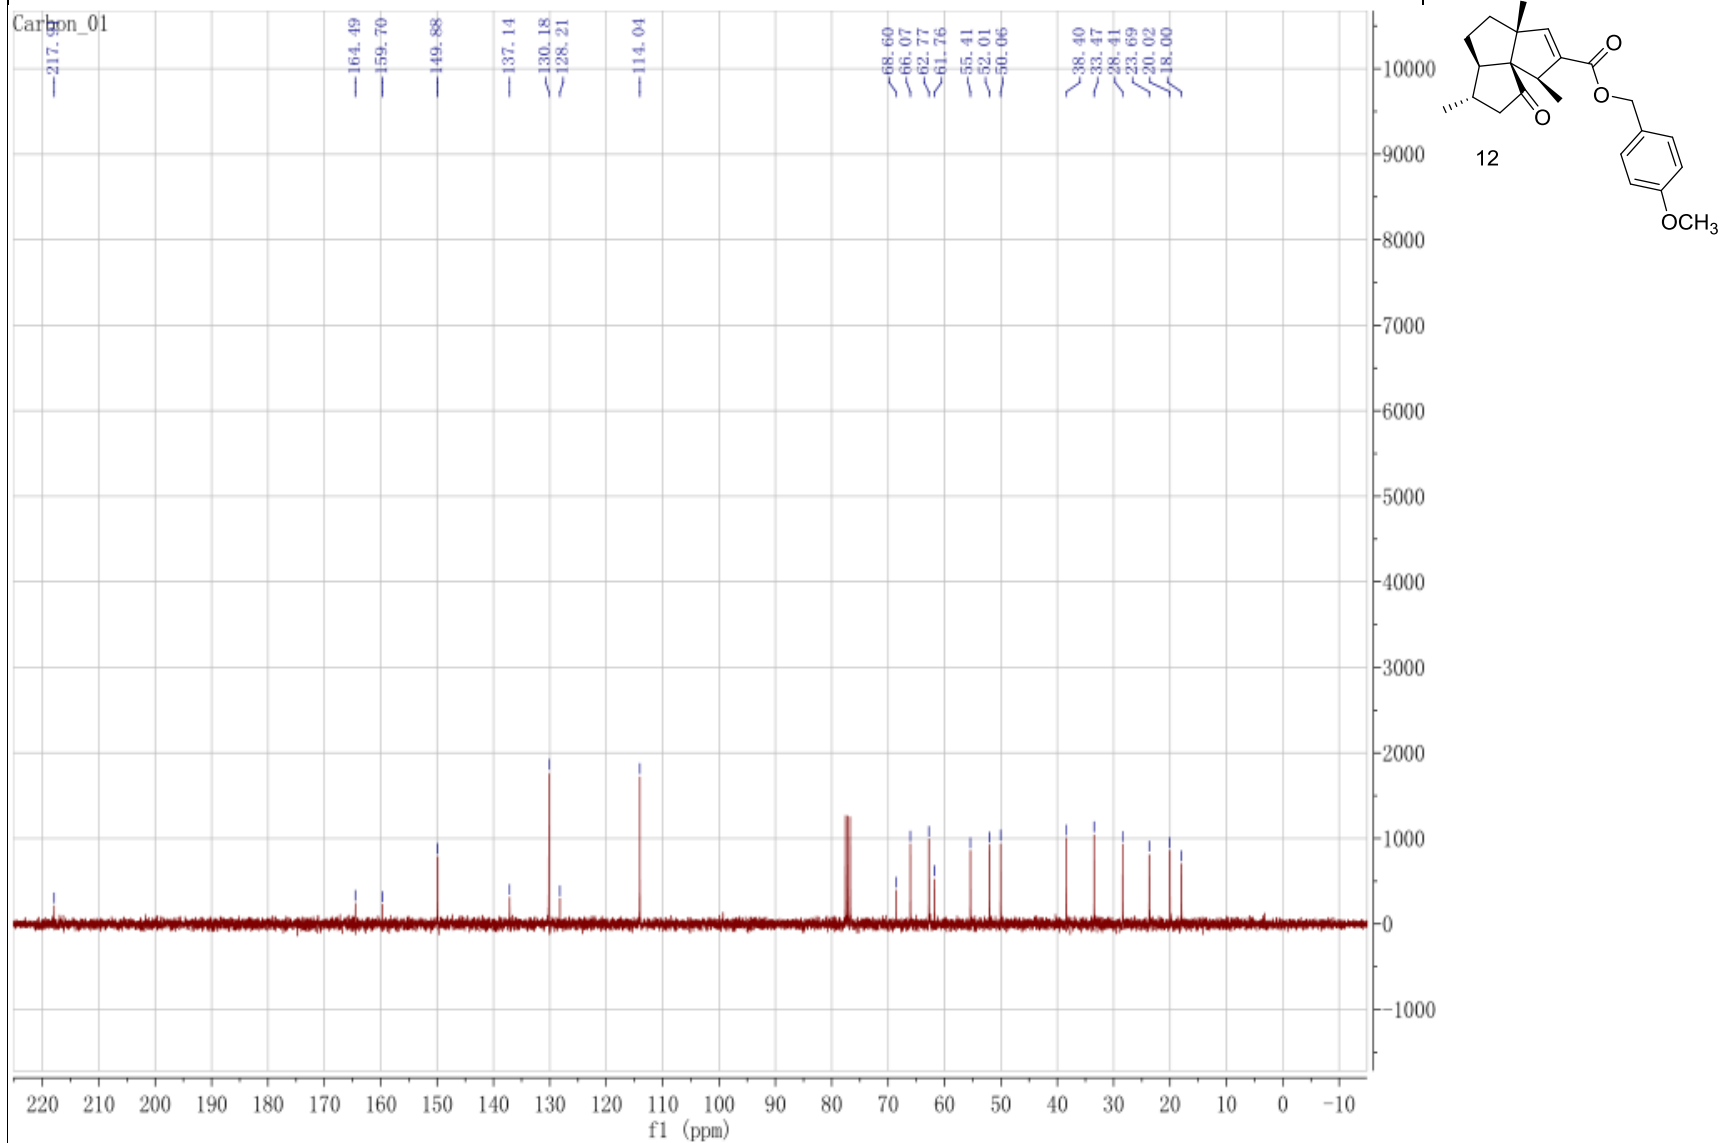

**Figure S30.**  $^1\text{H}$  NMR (300 MHz,  $\text{CDCl}_3$ ) of compound **13**

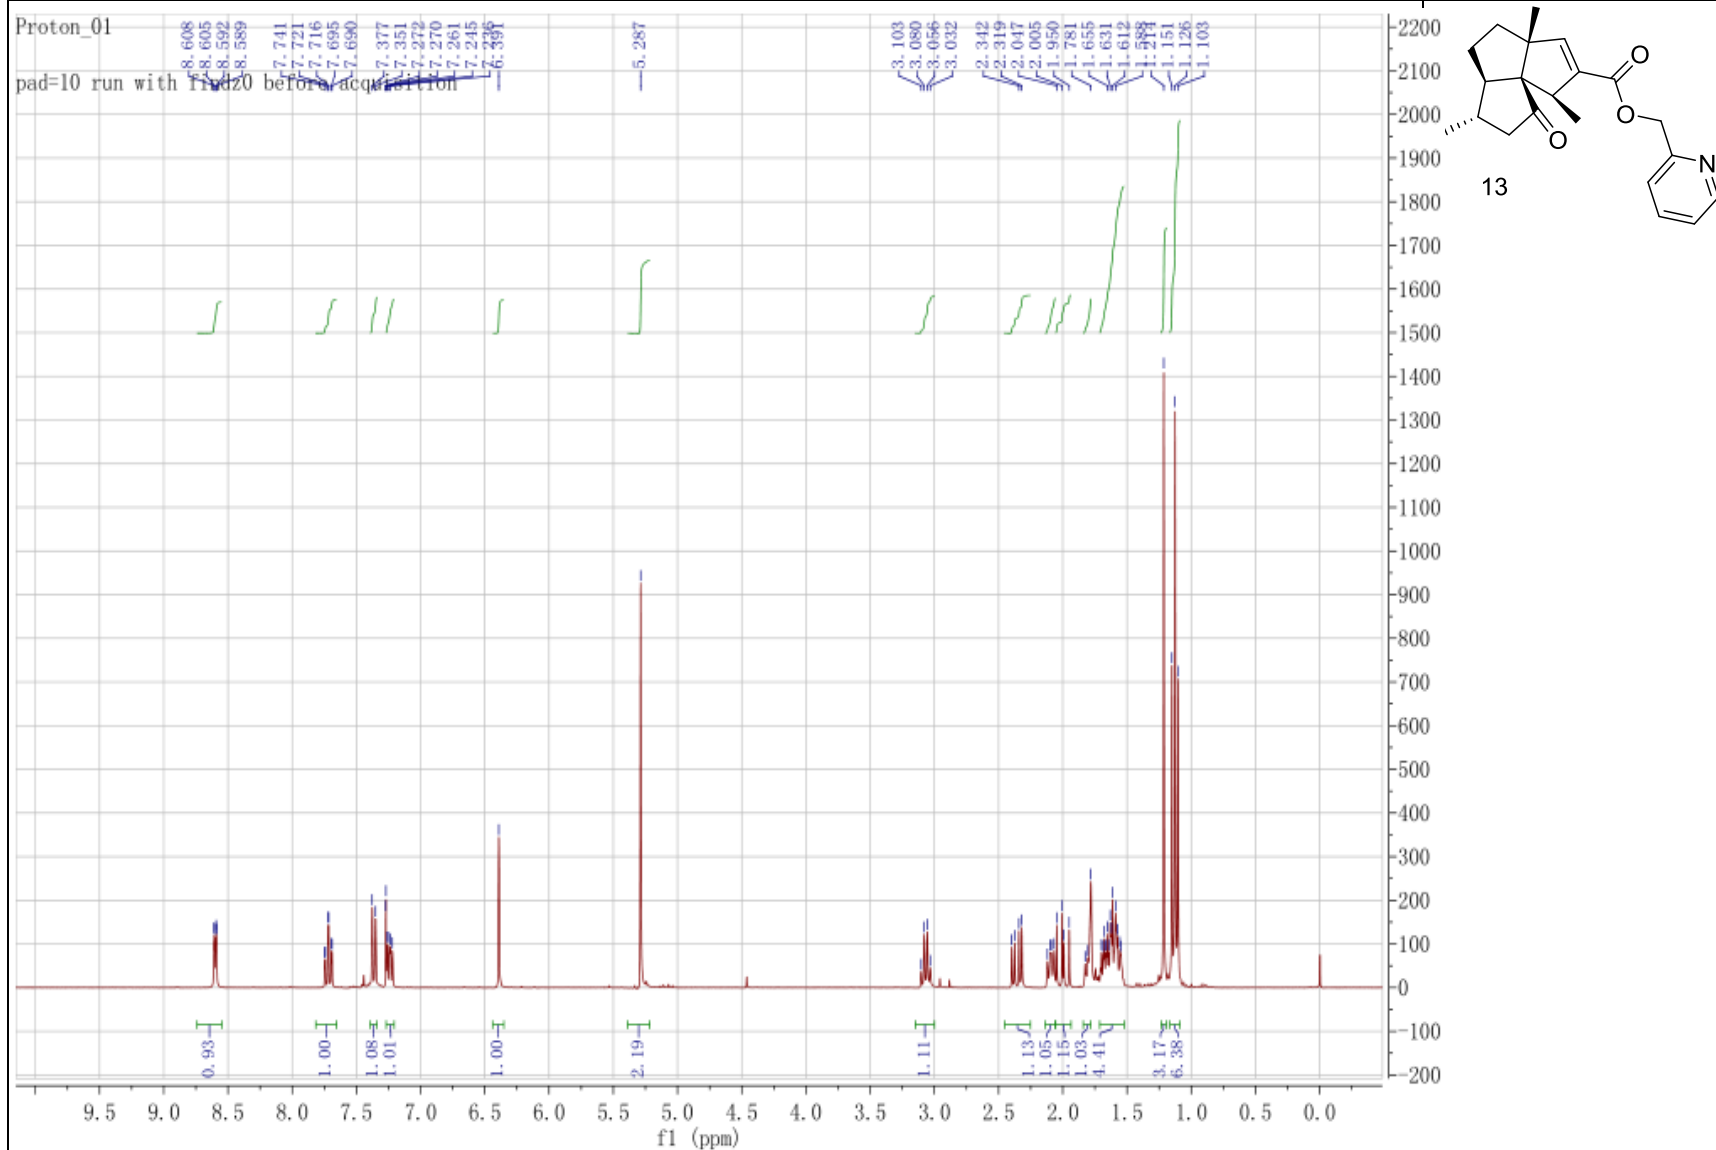



**Figure S31.**  $^{13}\text{C}$  NMR (75 MHz,  $\text{CDCl}_3$ ) of compound **13**

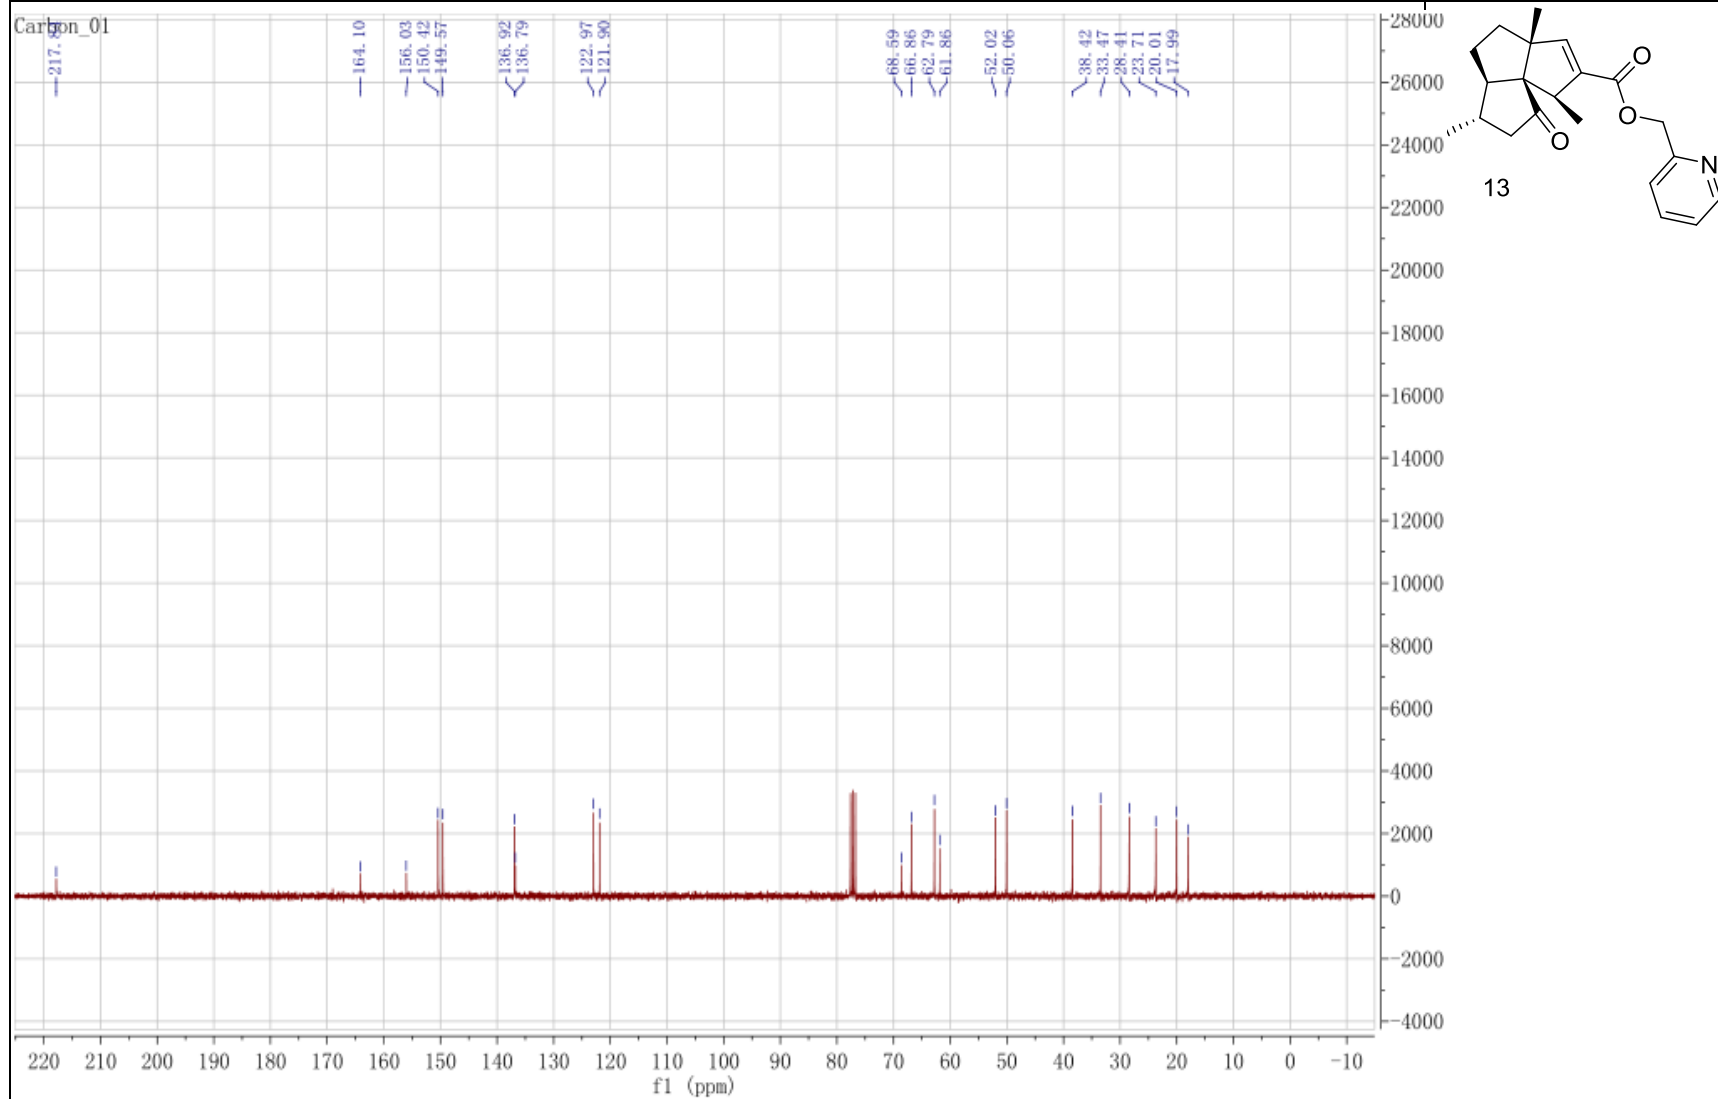

**Figure S32.**  $^1\text{H}$  NMR (300 MHz,  $\text{CDCl}_3$ ) of compound **14**

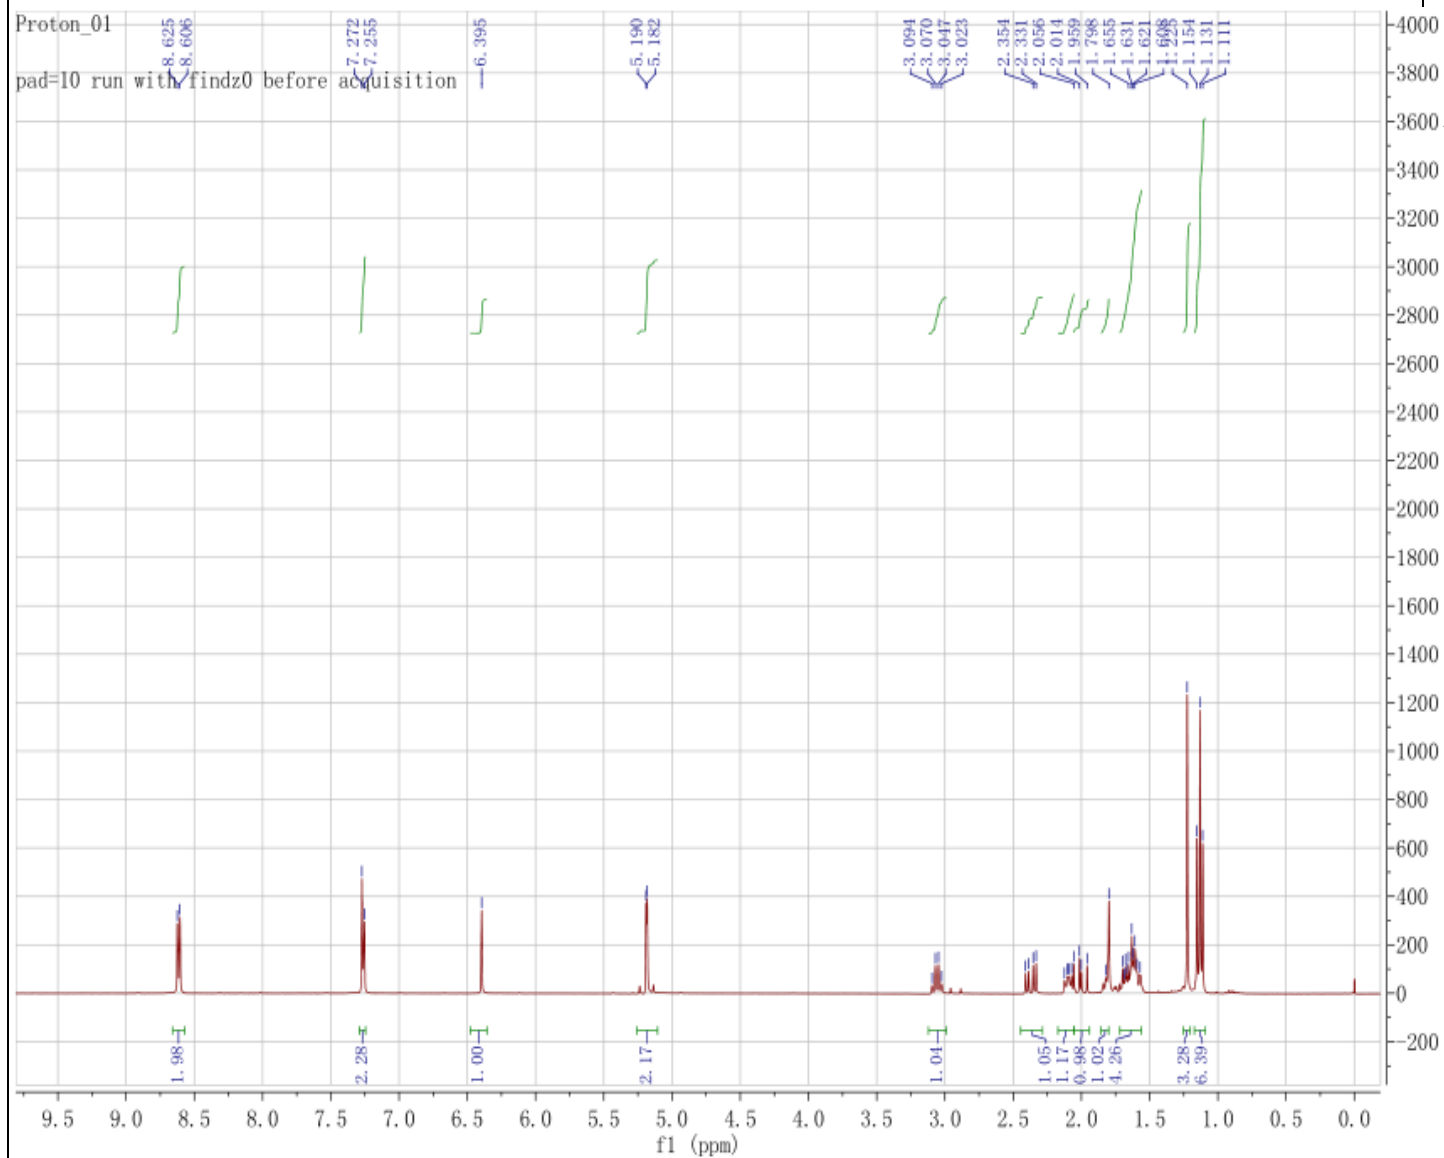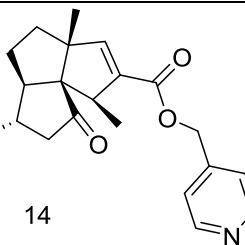

**Figure S33.**  $^{13}\text{C}$  NMR (75 MHz,  $\text{CDCl}_3$ ) of compound **14**

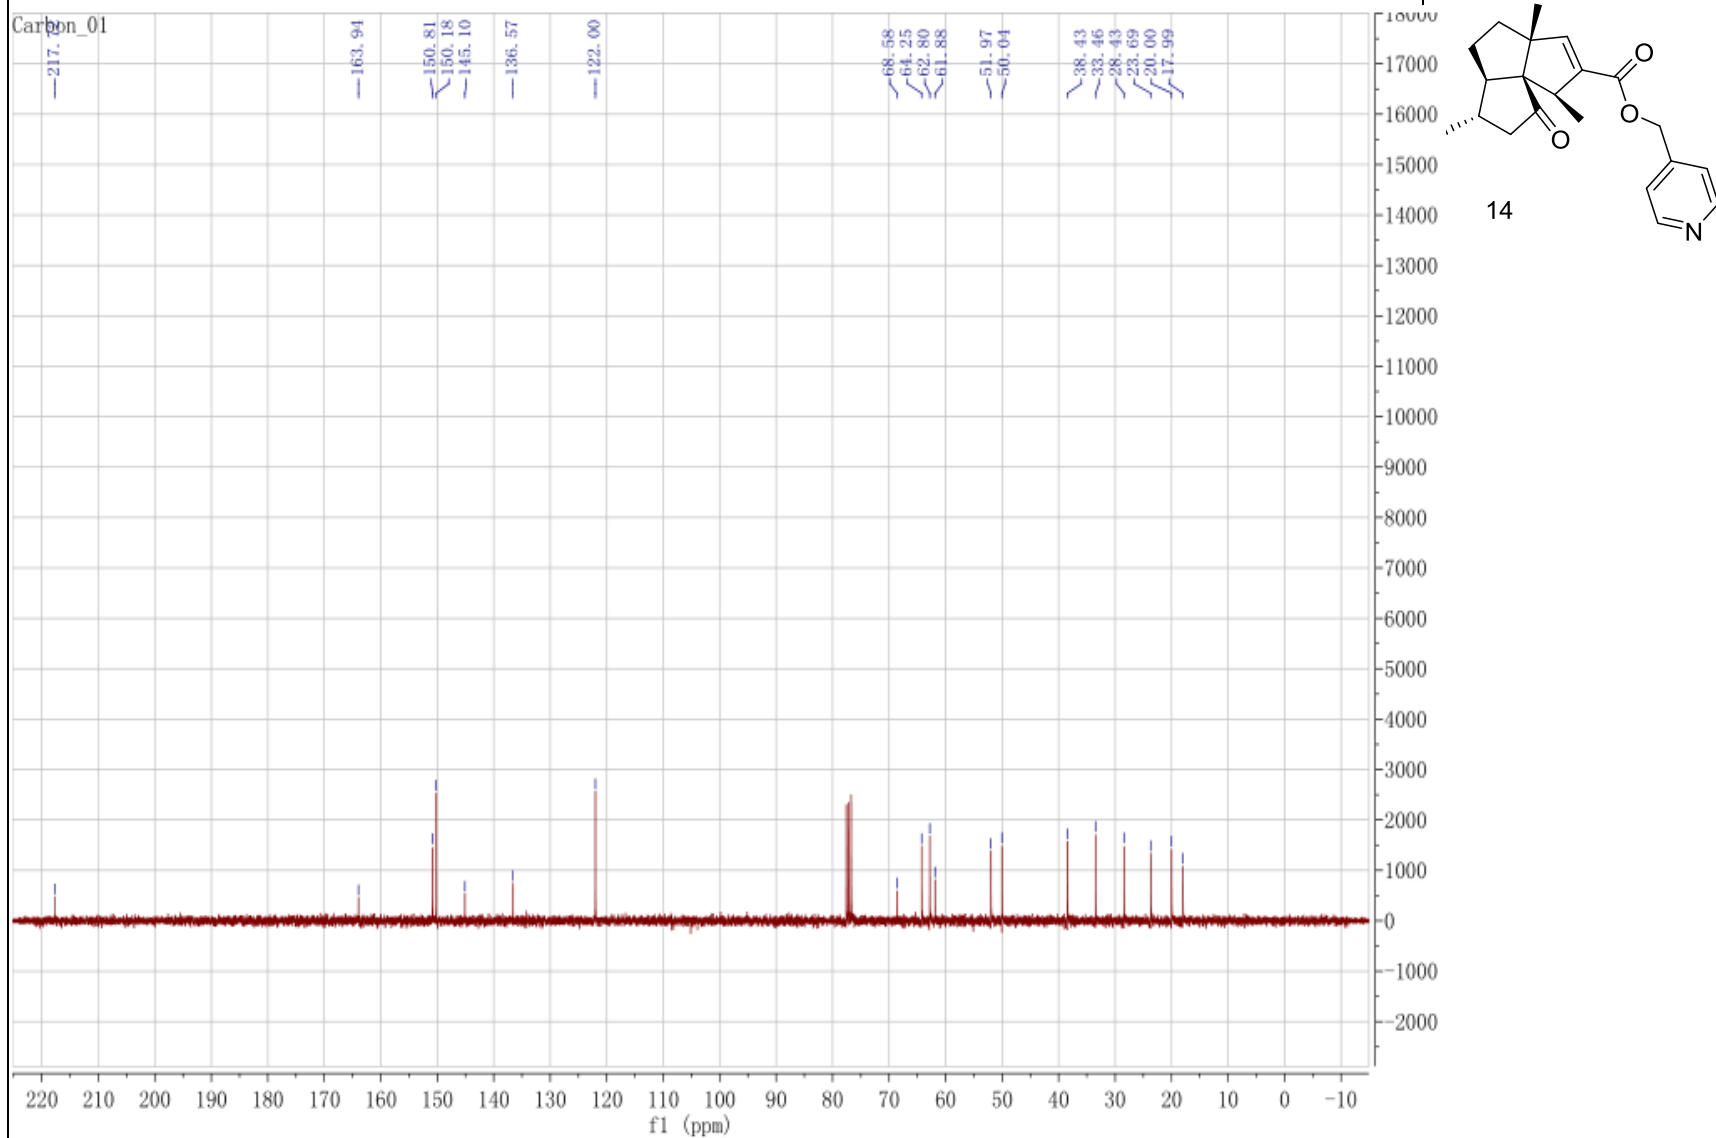

**Figure S34.**  $^1\text{H}$  NMR (300 MHz,  $\text{CDCl}_3$ ) of compound **15**

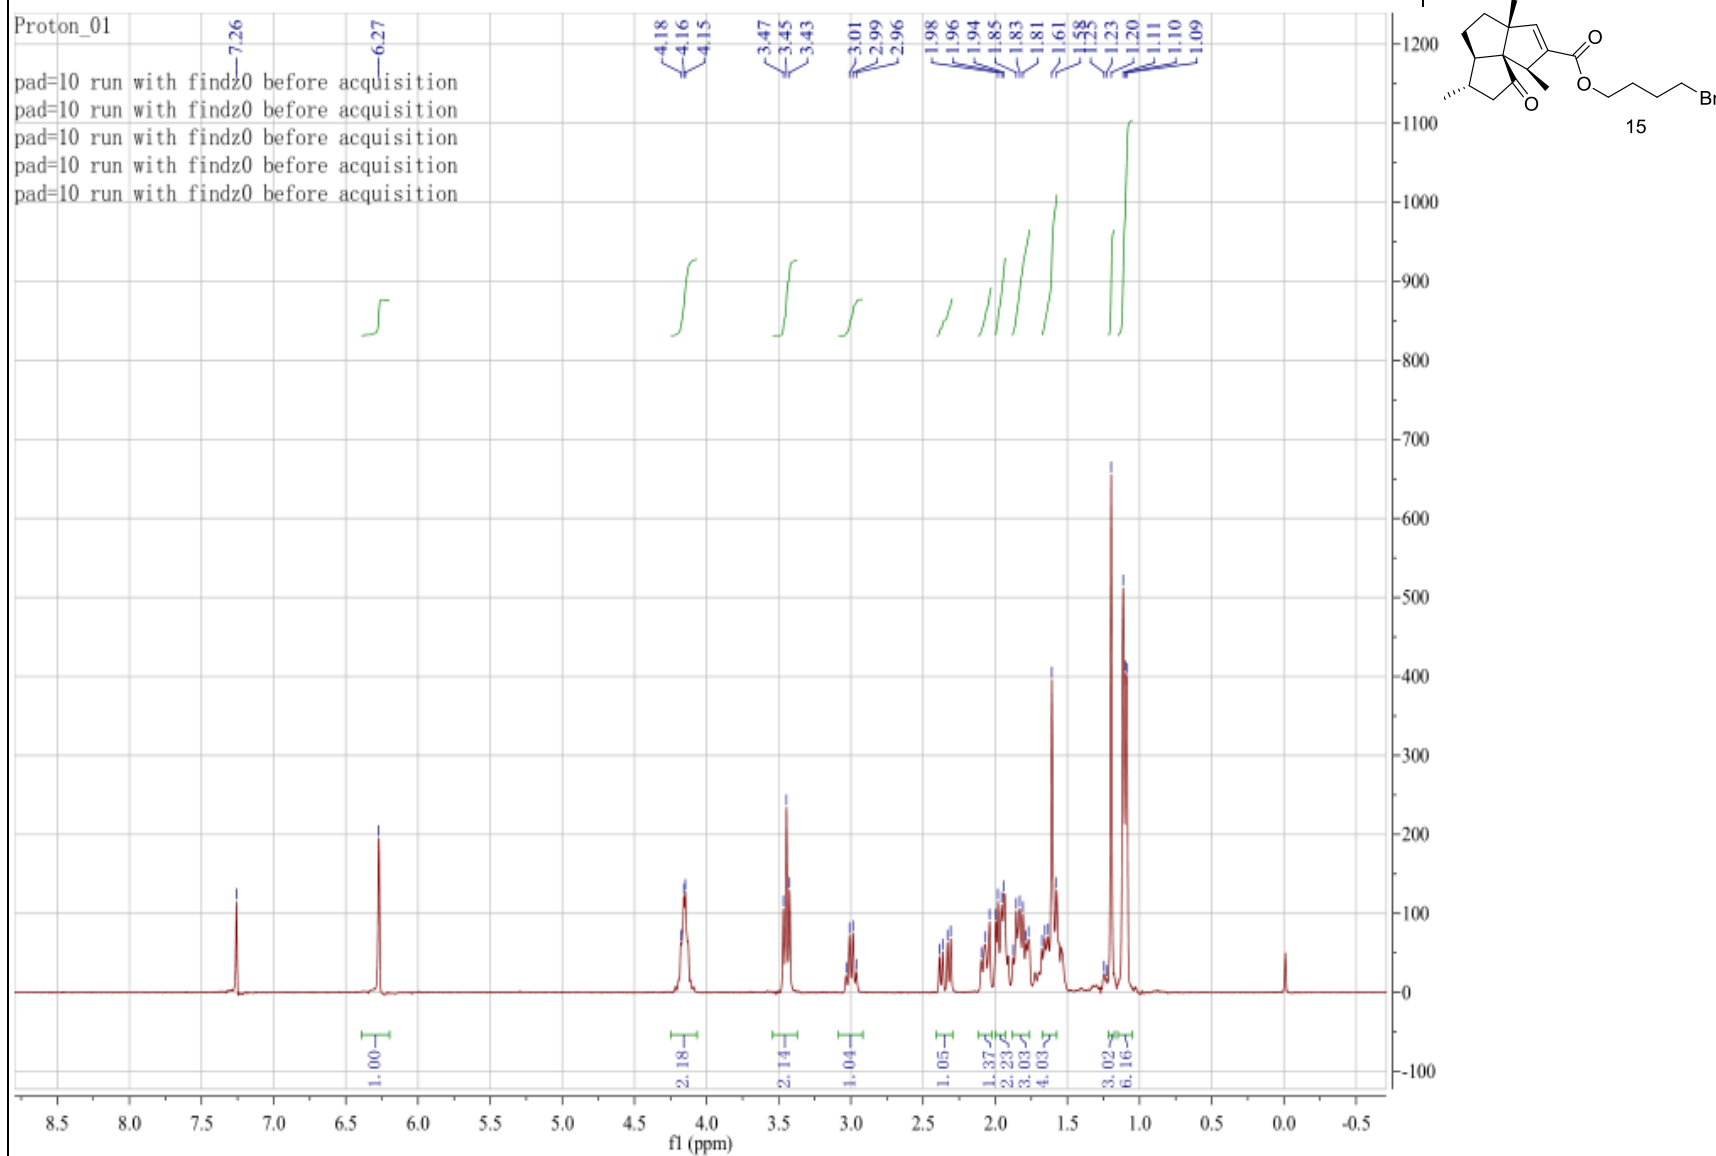

**Figure S35.**  $^{13}\text{C}$  NMR (75 MHz,  $\text{CDCl}_3$ ) of compound **15**

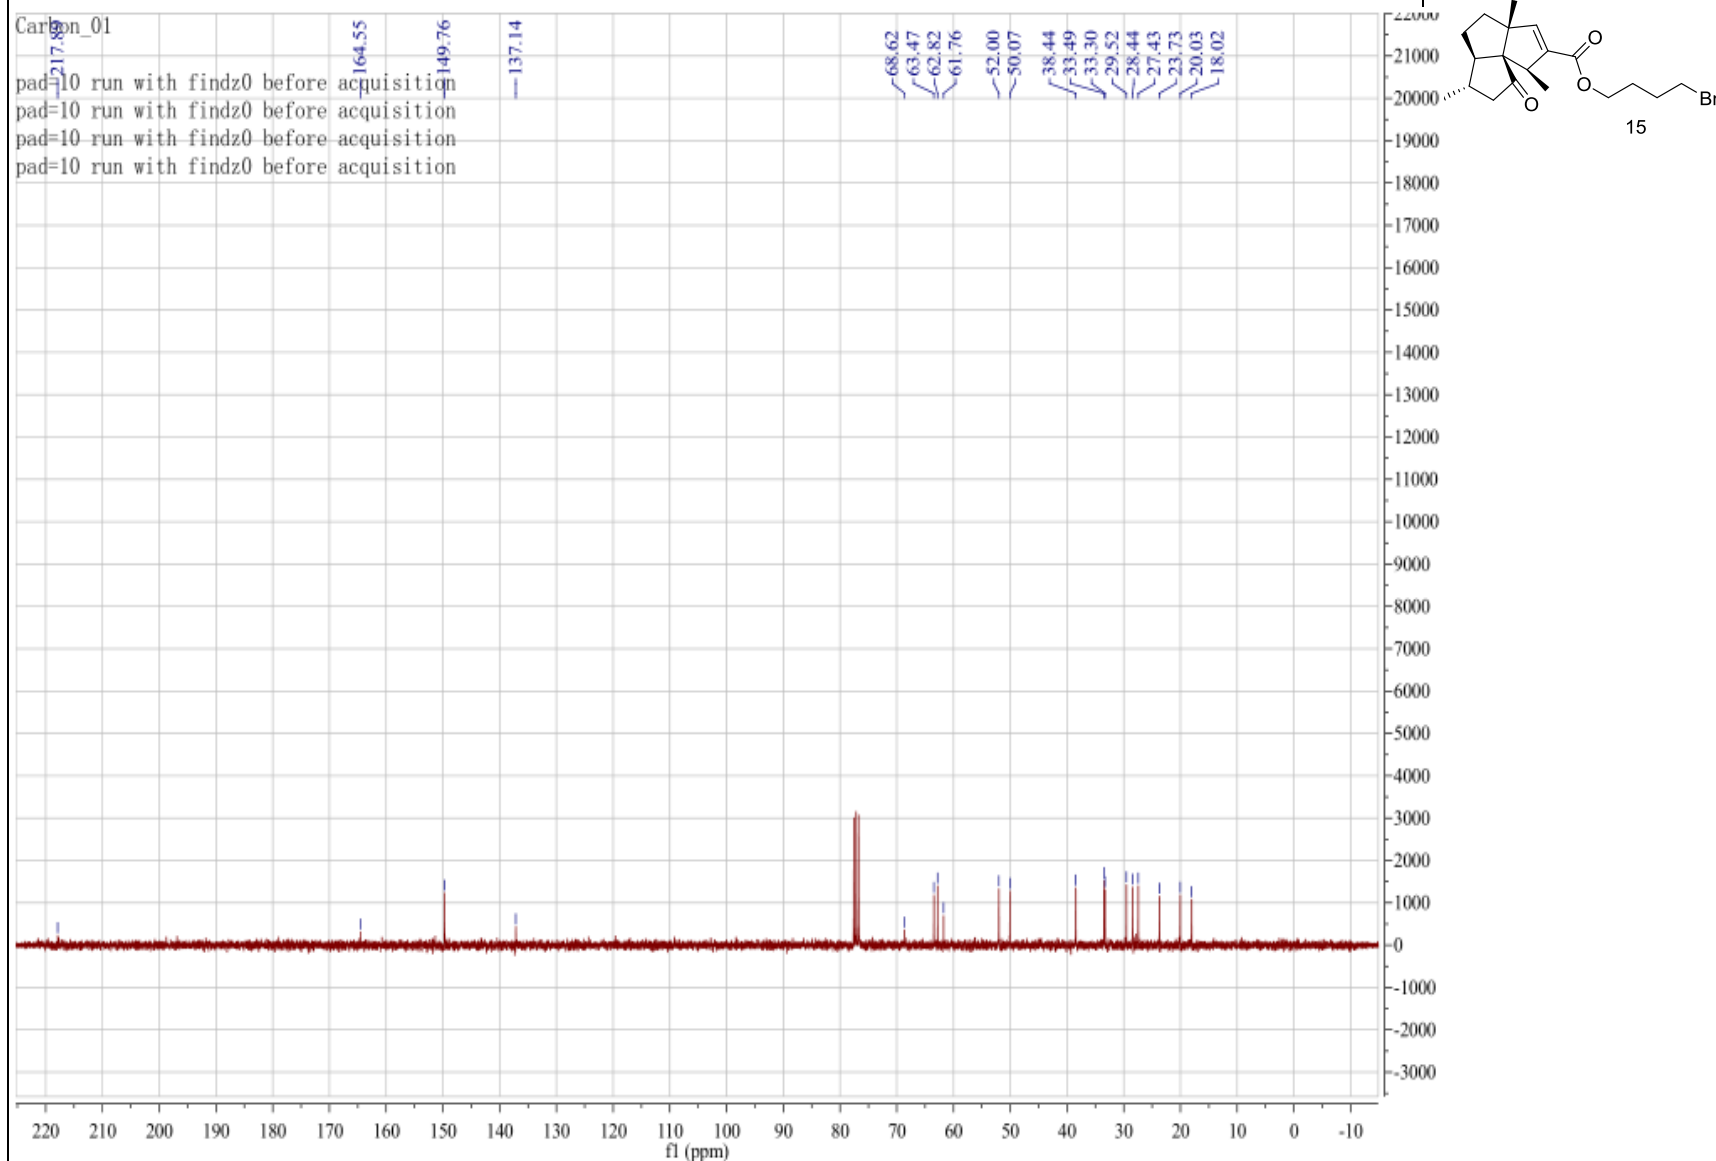

**Figure S36.**  $^1\text{H}$  NMR (400 MHz,  $\text{CDCl}_3$ ) of compound **16**

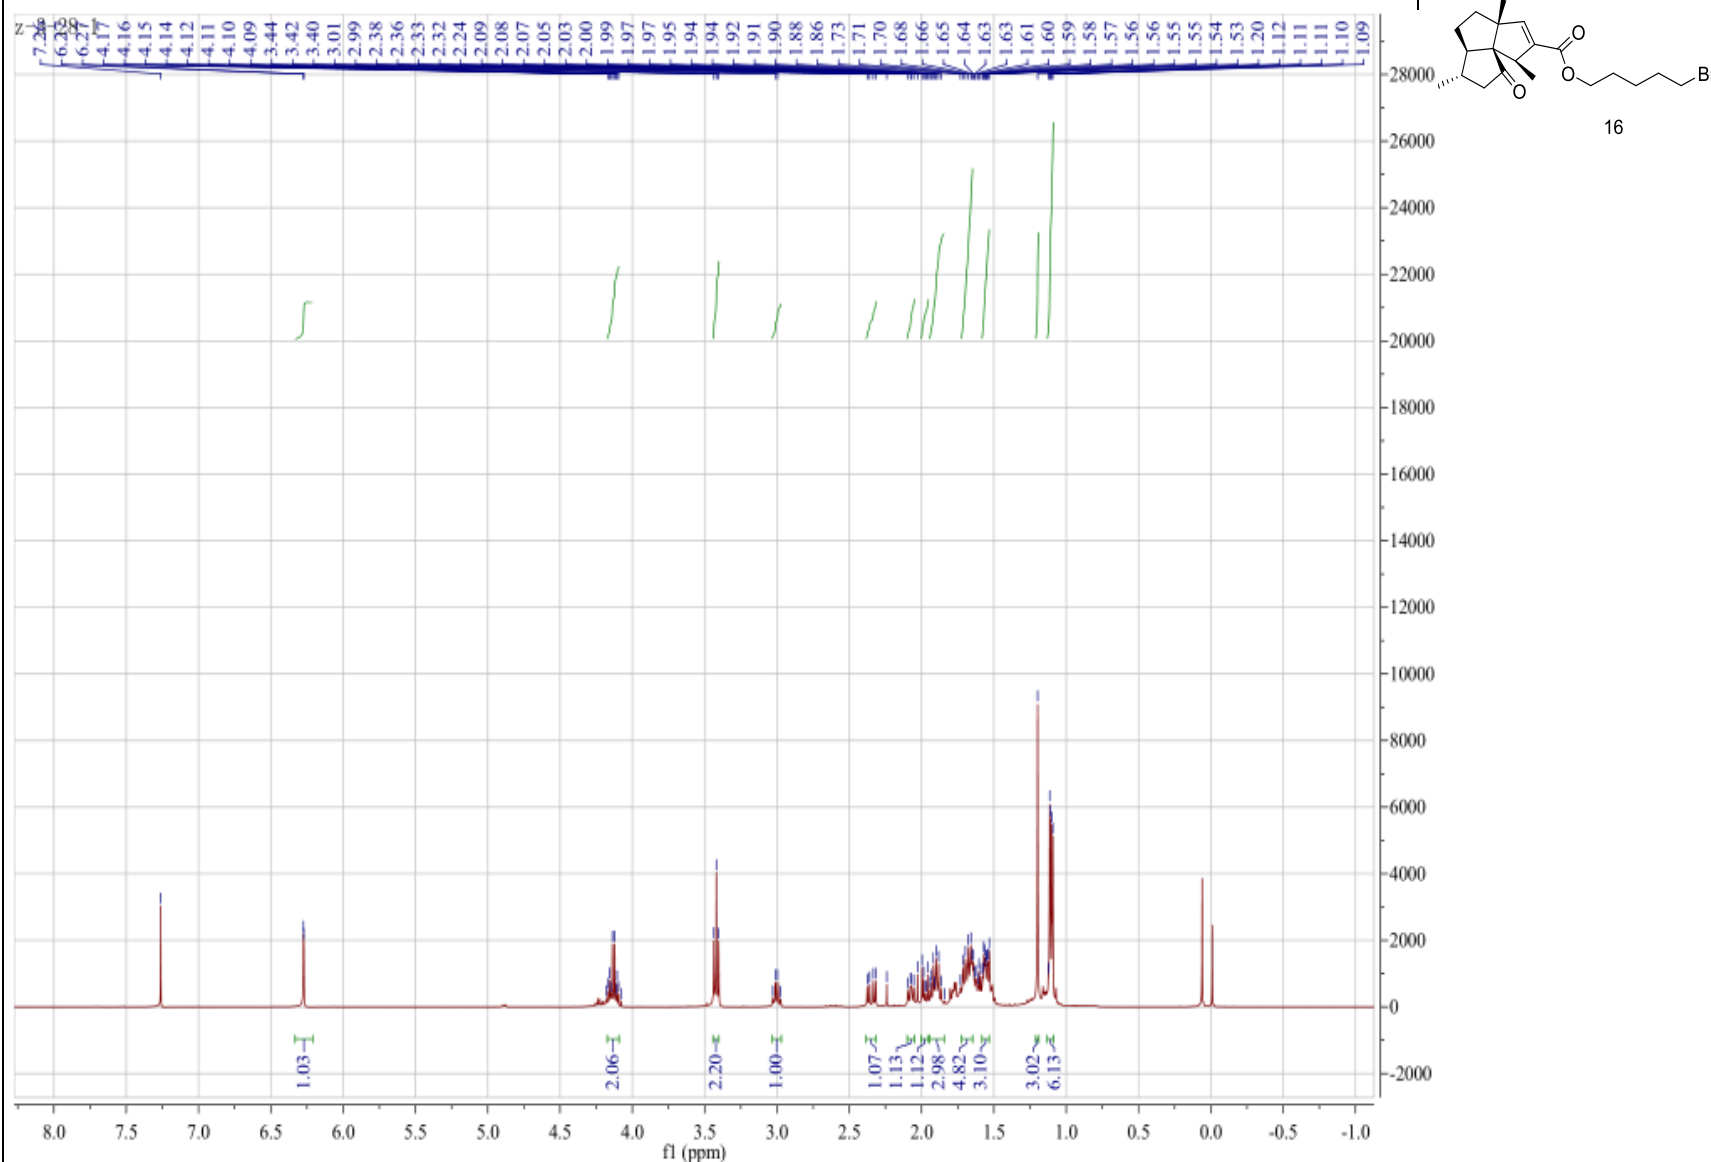

**Figure S37.**  $^{13}\text{C}$  NMR (100 MHz,  $\text{CDCl}_3$ ) of compound **16**

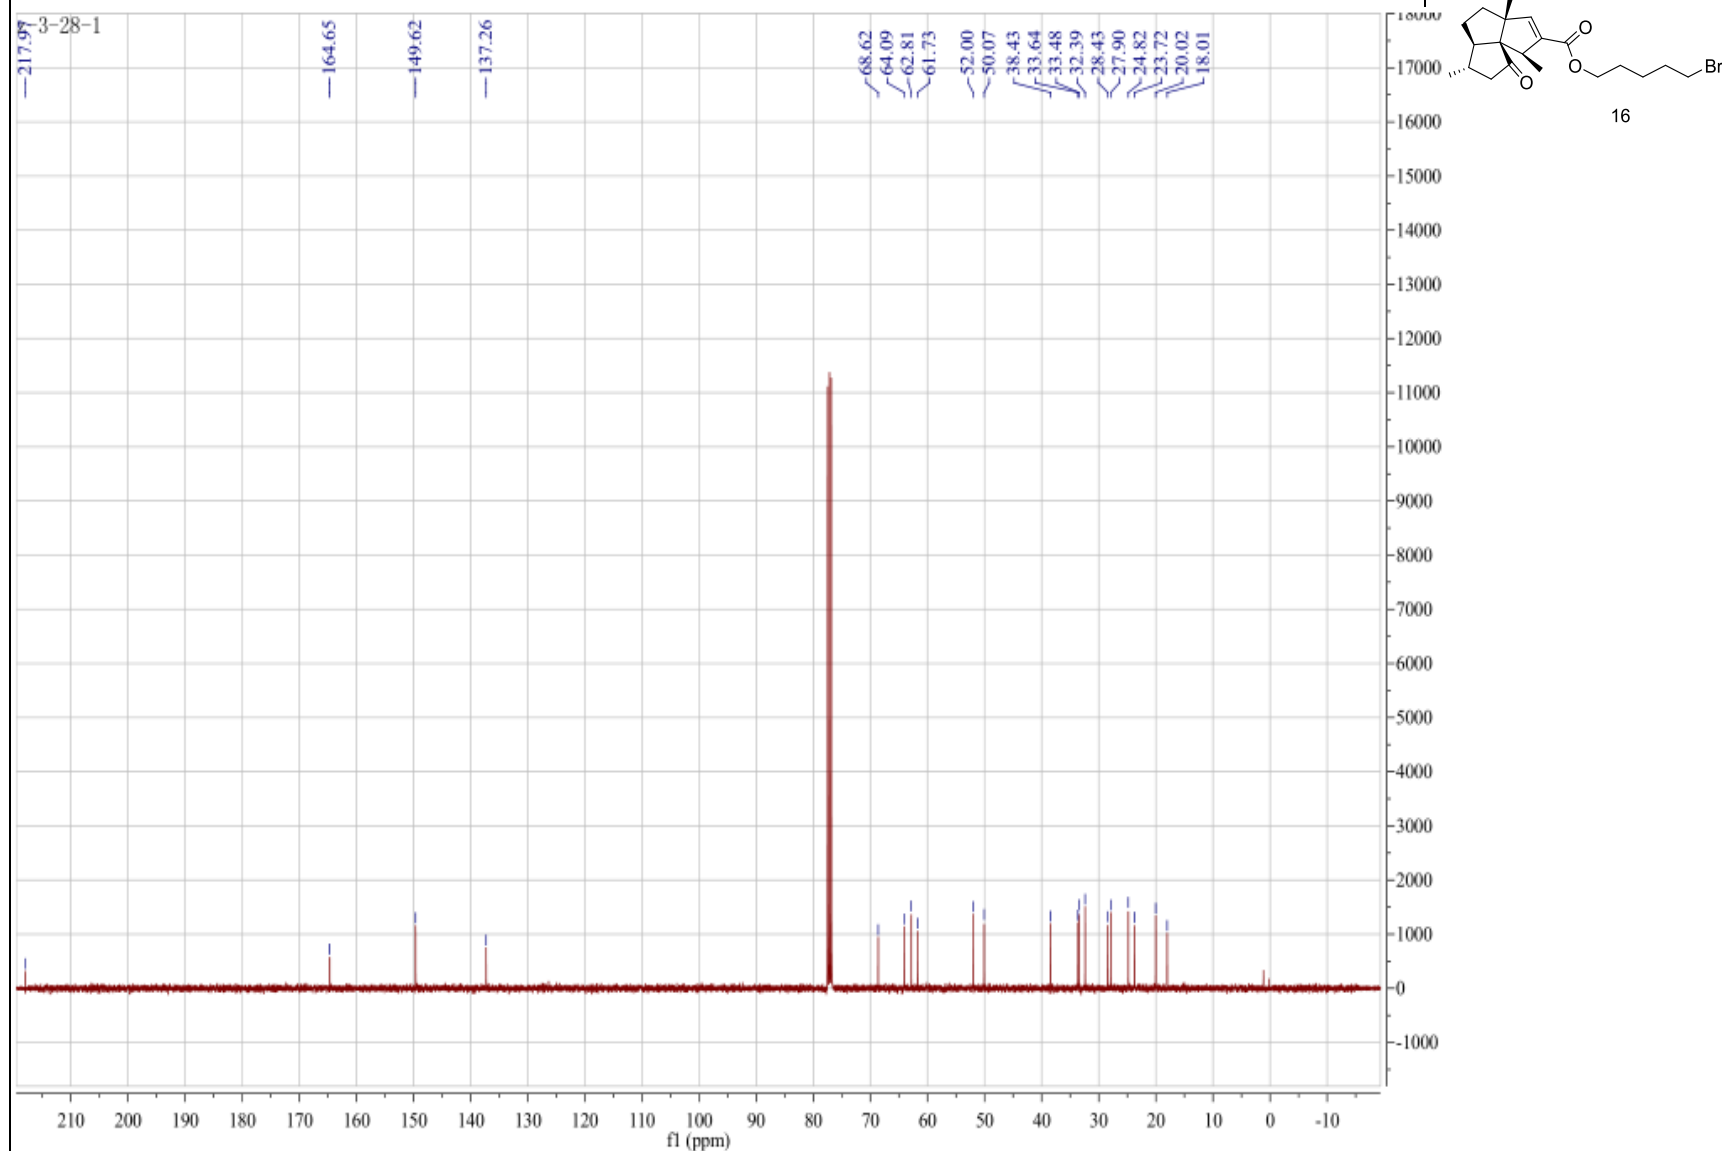

**Figure S38.**  $^1\text{H}$  NMR (400 MHz,  $\text{CDCl}_3$ ) of compound 17

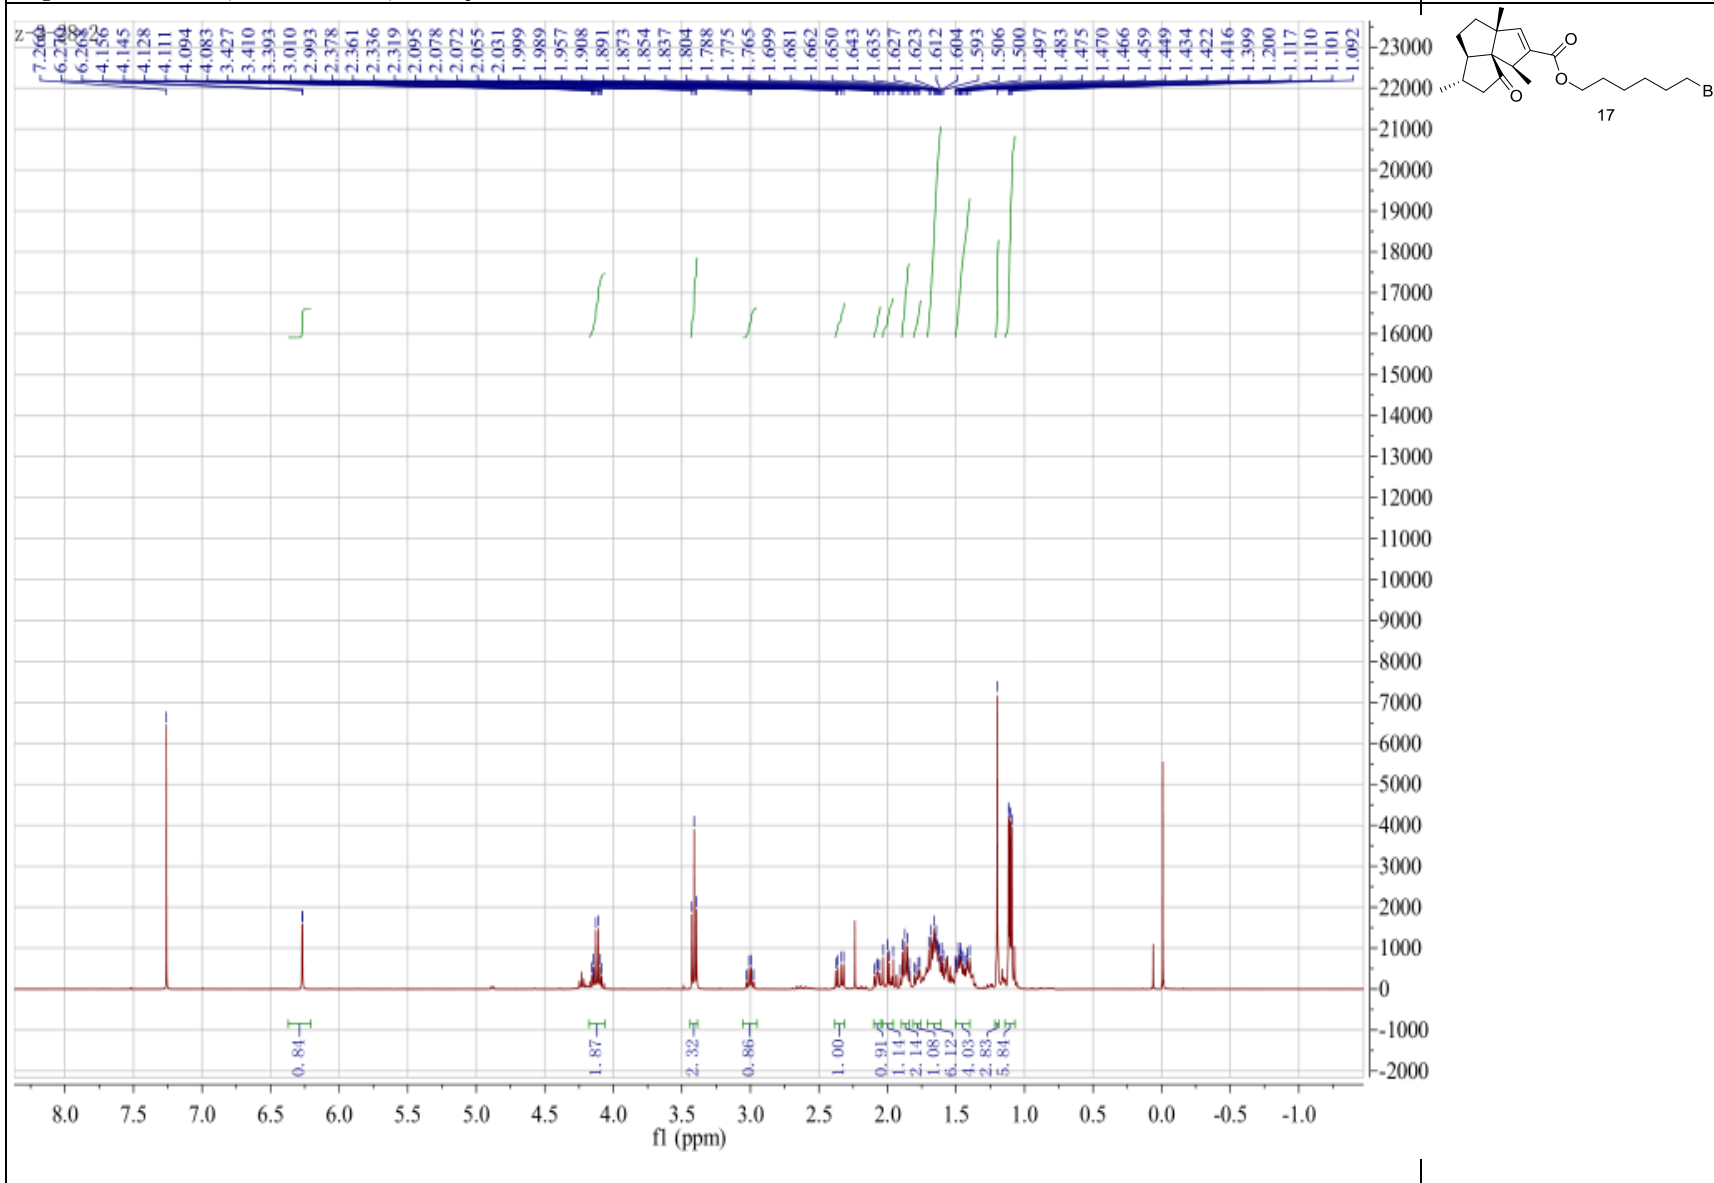



**Figure S39.**  $^{13}\text{C}$  NMR (100 MHz,  $\text{CDCl}_3$ ) of compound **17**

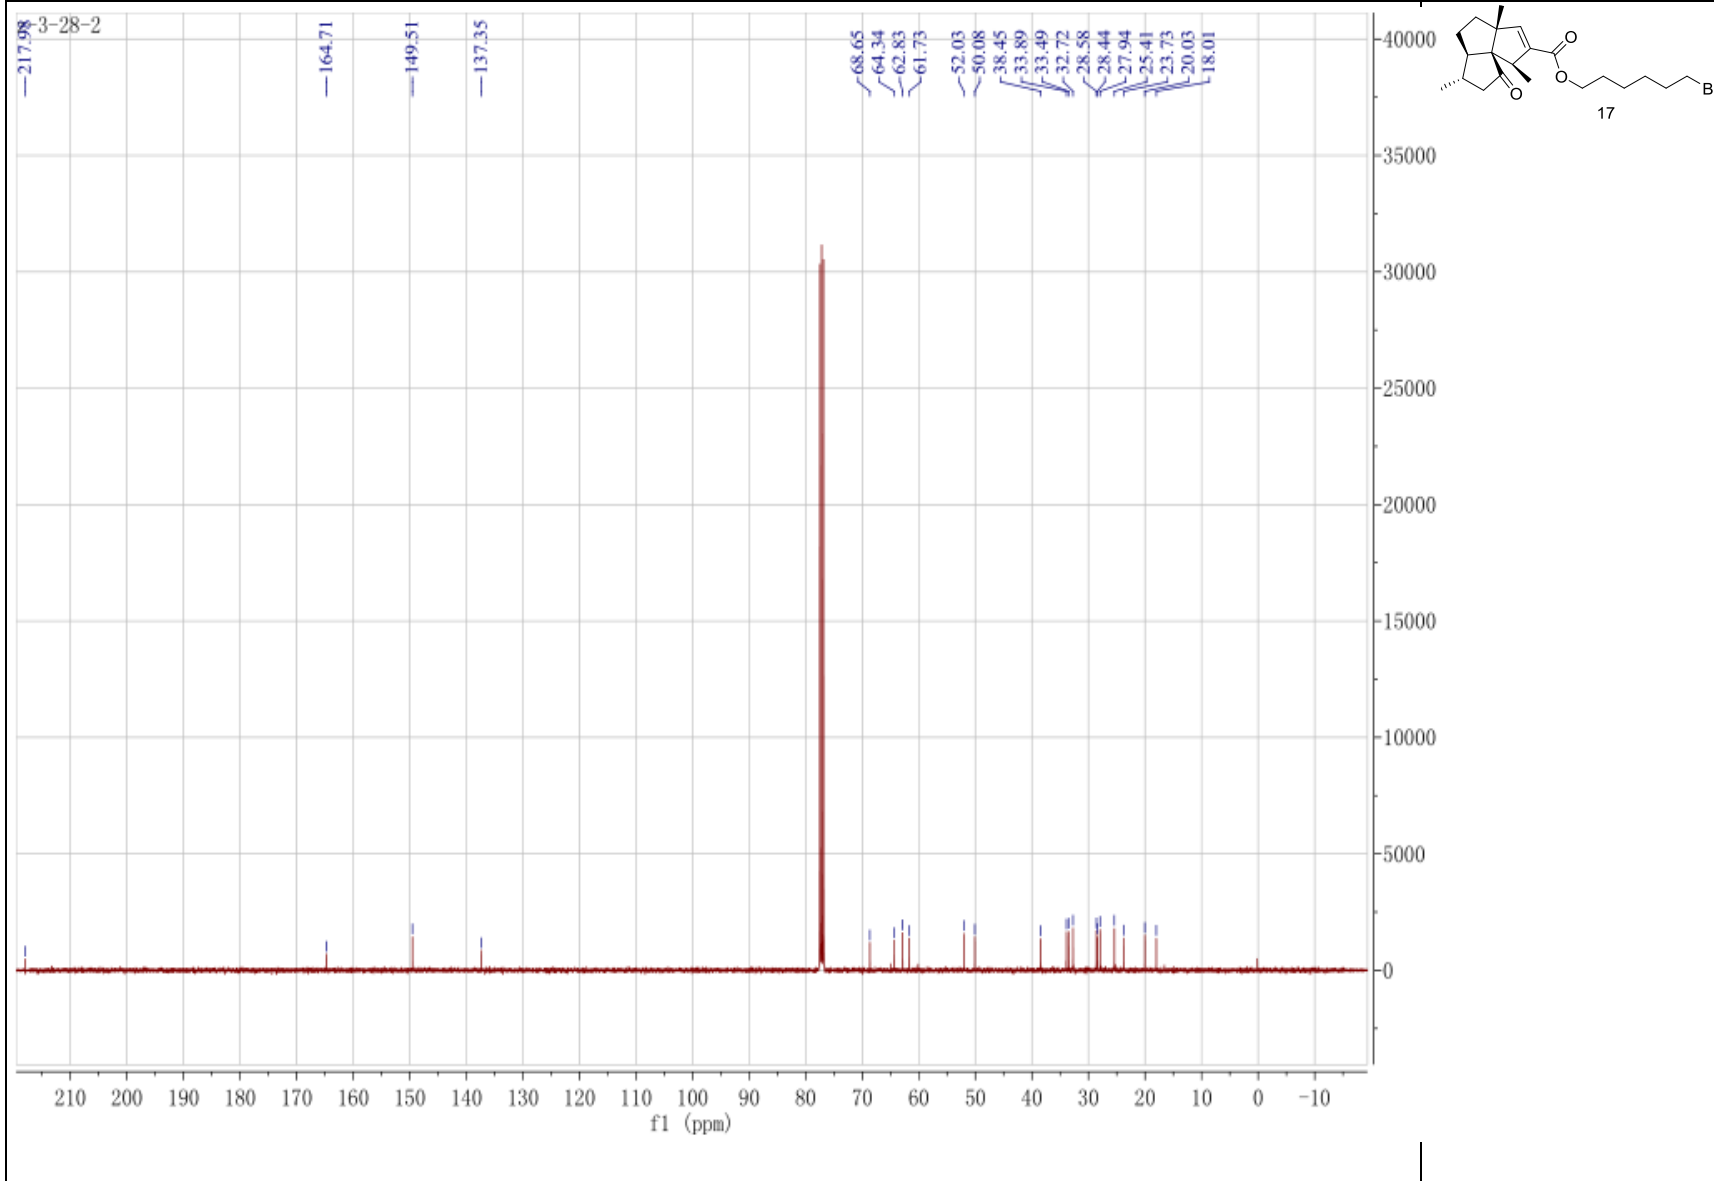

**Figure S40.**  $^1\text{H}$  NMR (400 MHz,  $\text{CDCl}_3$ ) of compound **18**

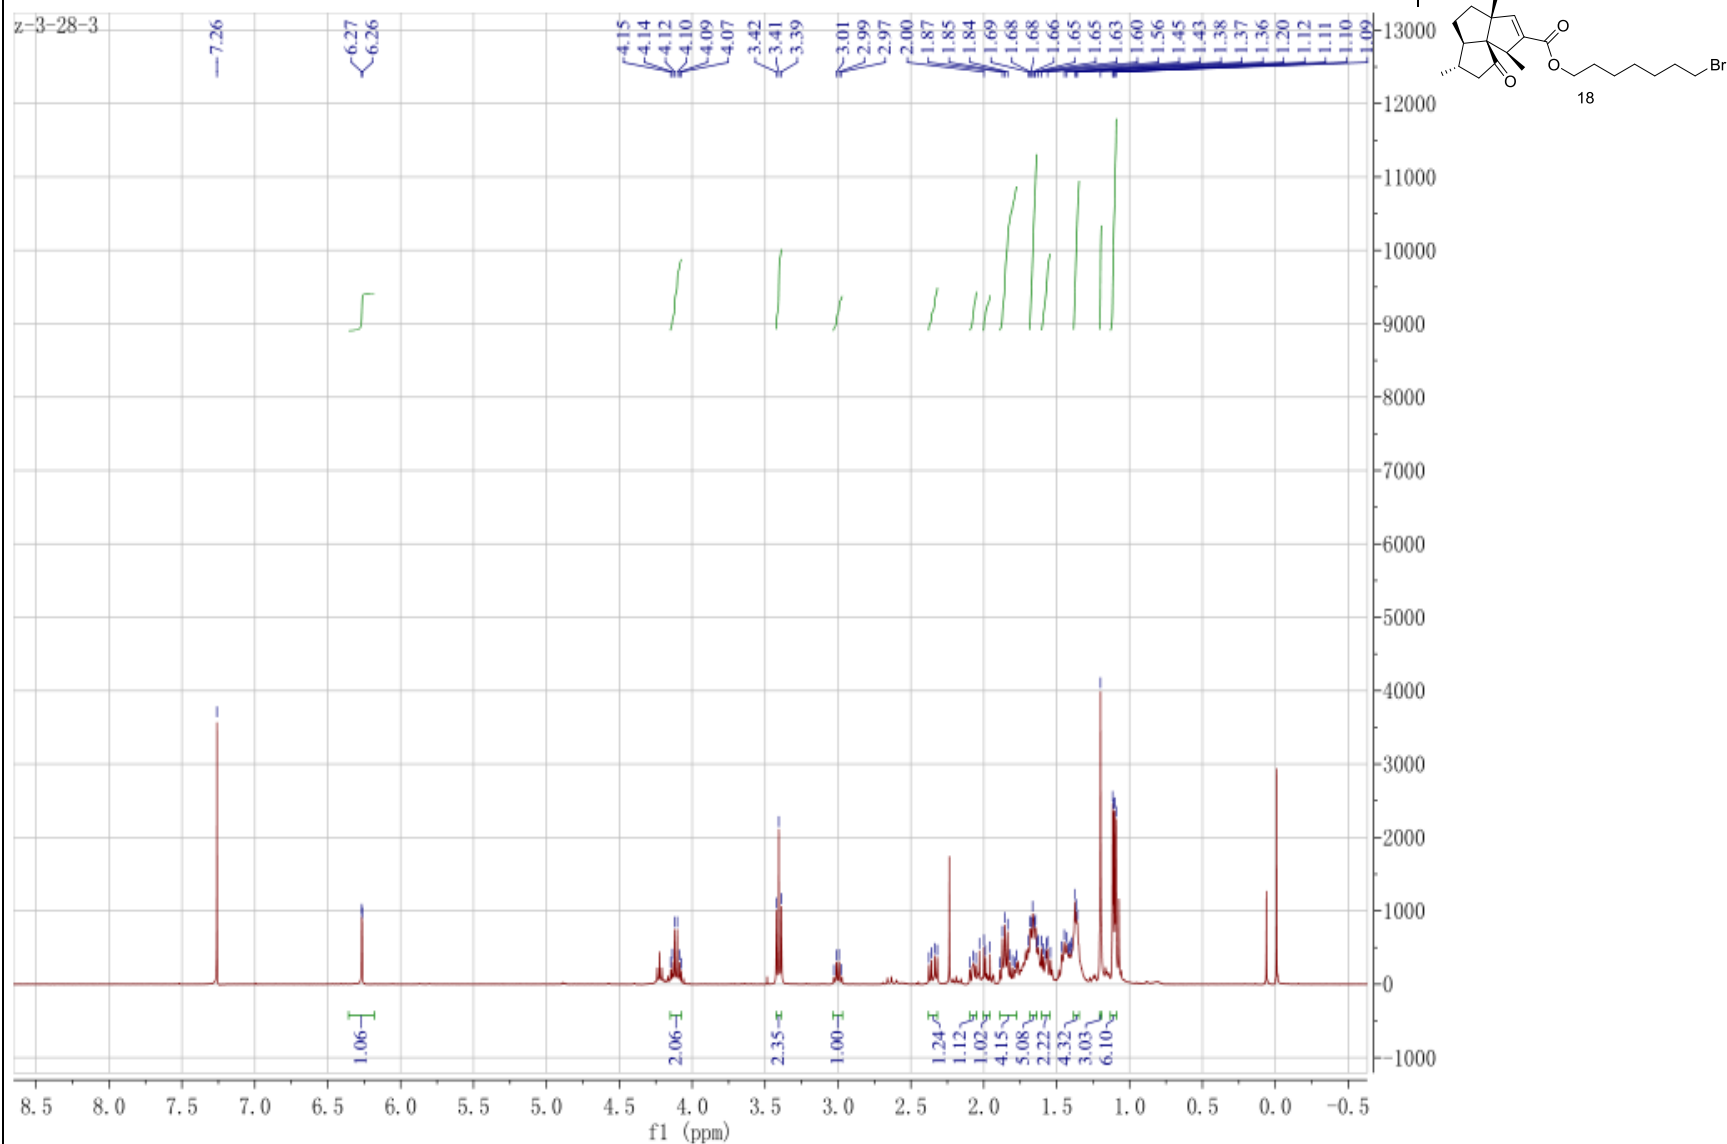

**Figure S41.**  $^{13}\text{C}$  NMR (100 MHz,  $\text{CDCl}_3$ ) of compound **18**

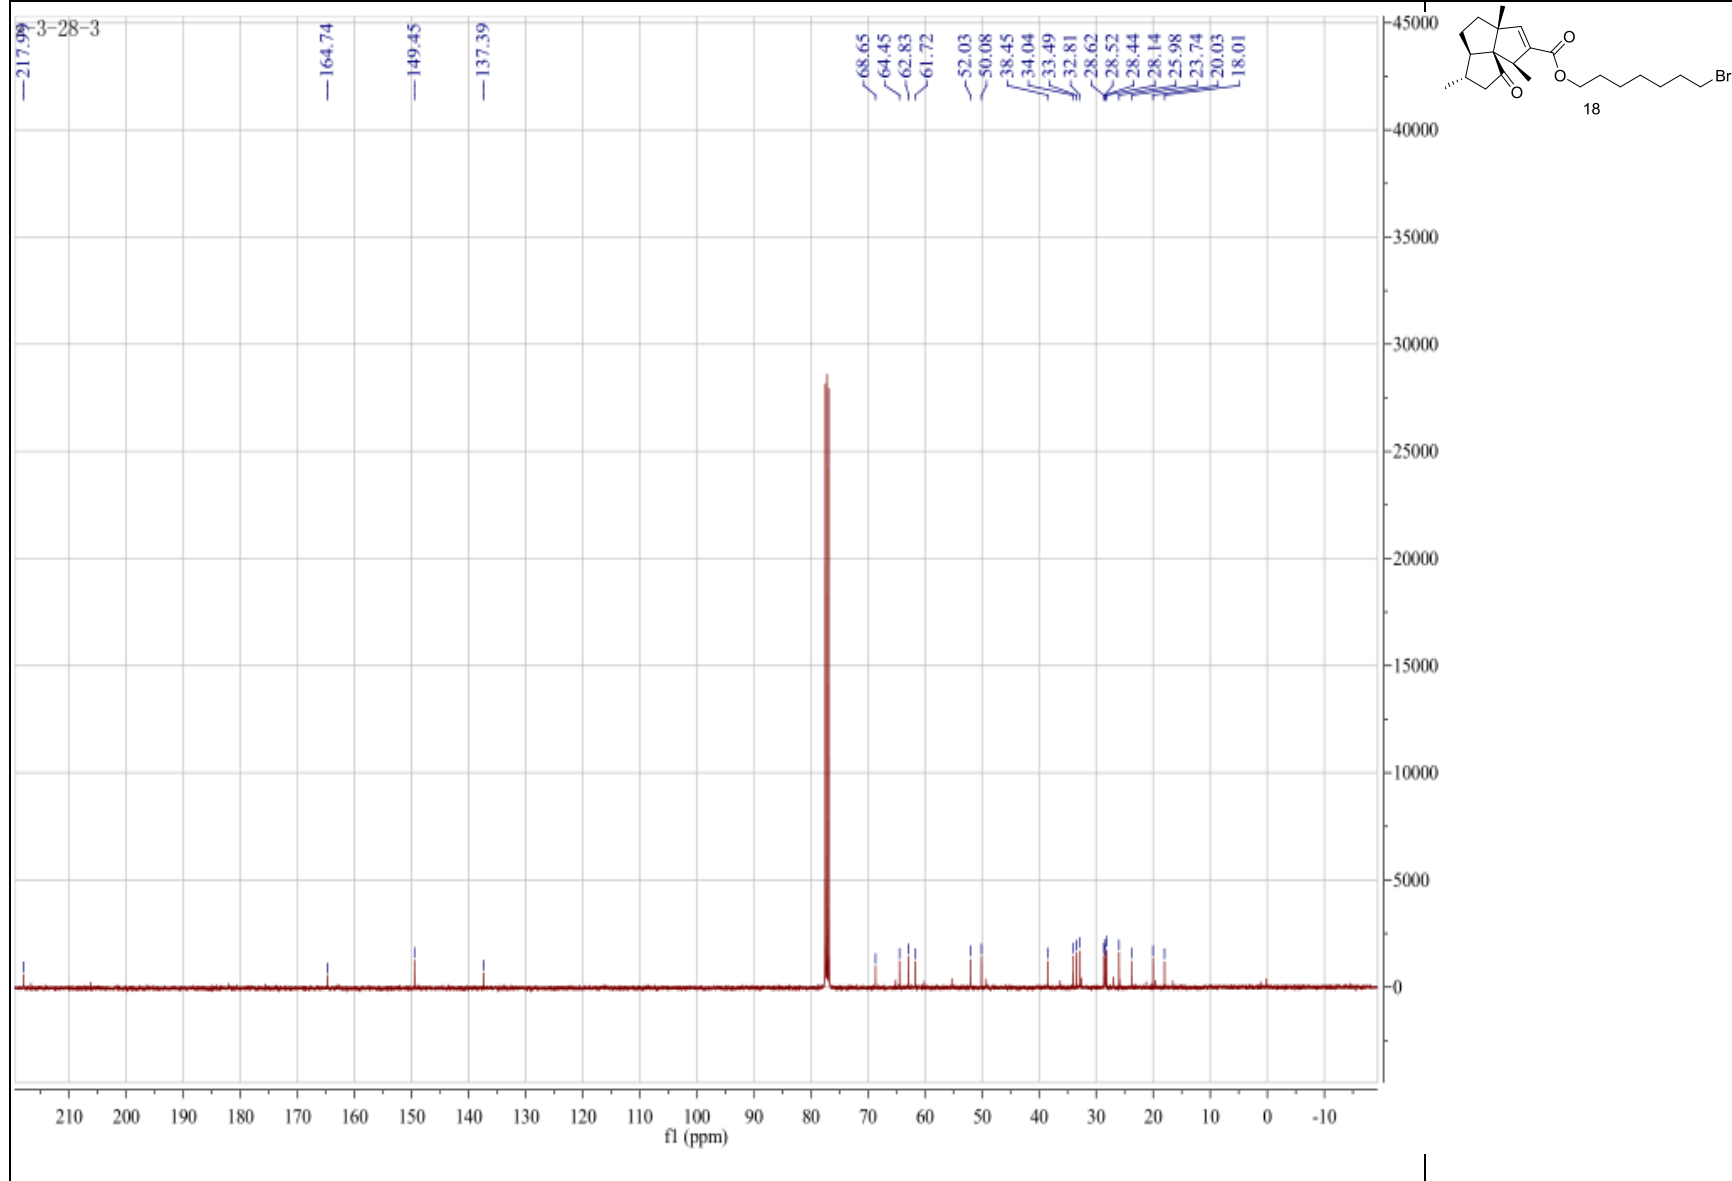

**Figure S42.**  $^1\text{H}$  NMR (400 MHz,  $\text{CDCl}_3$ ) of compound **19**

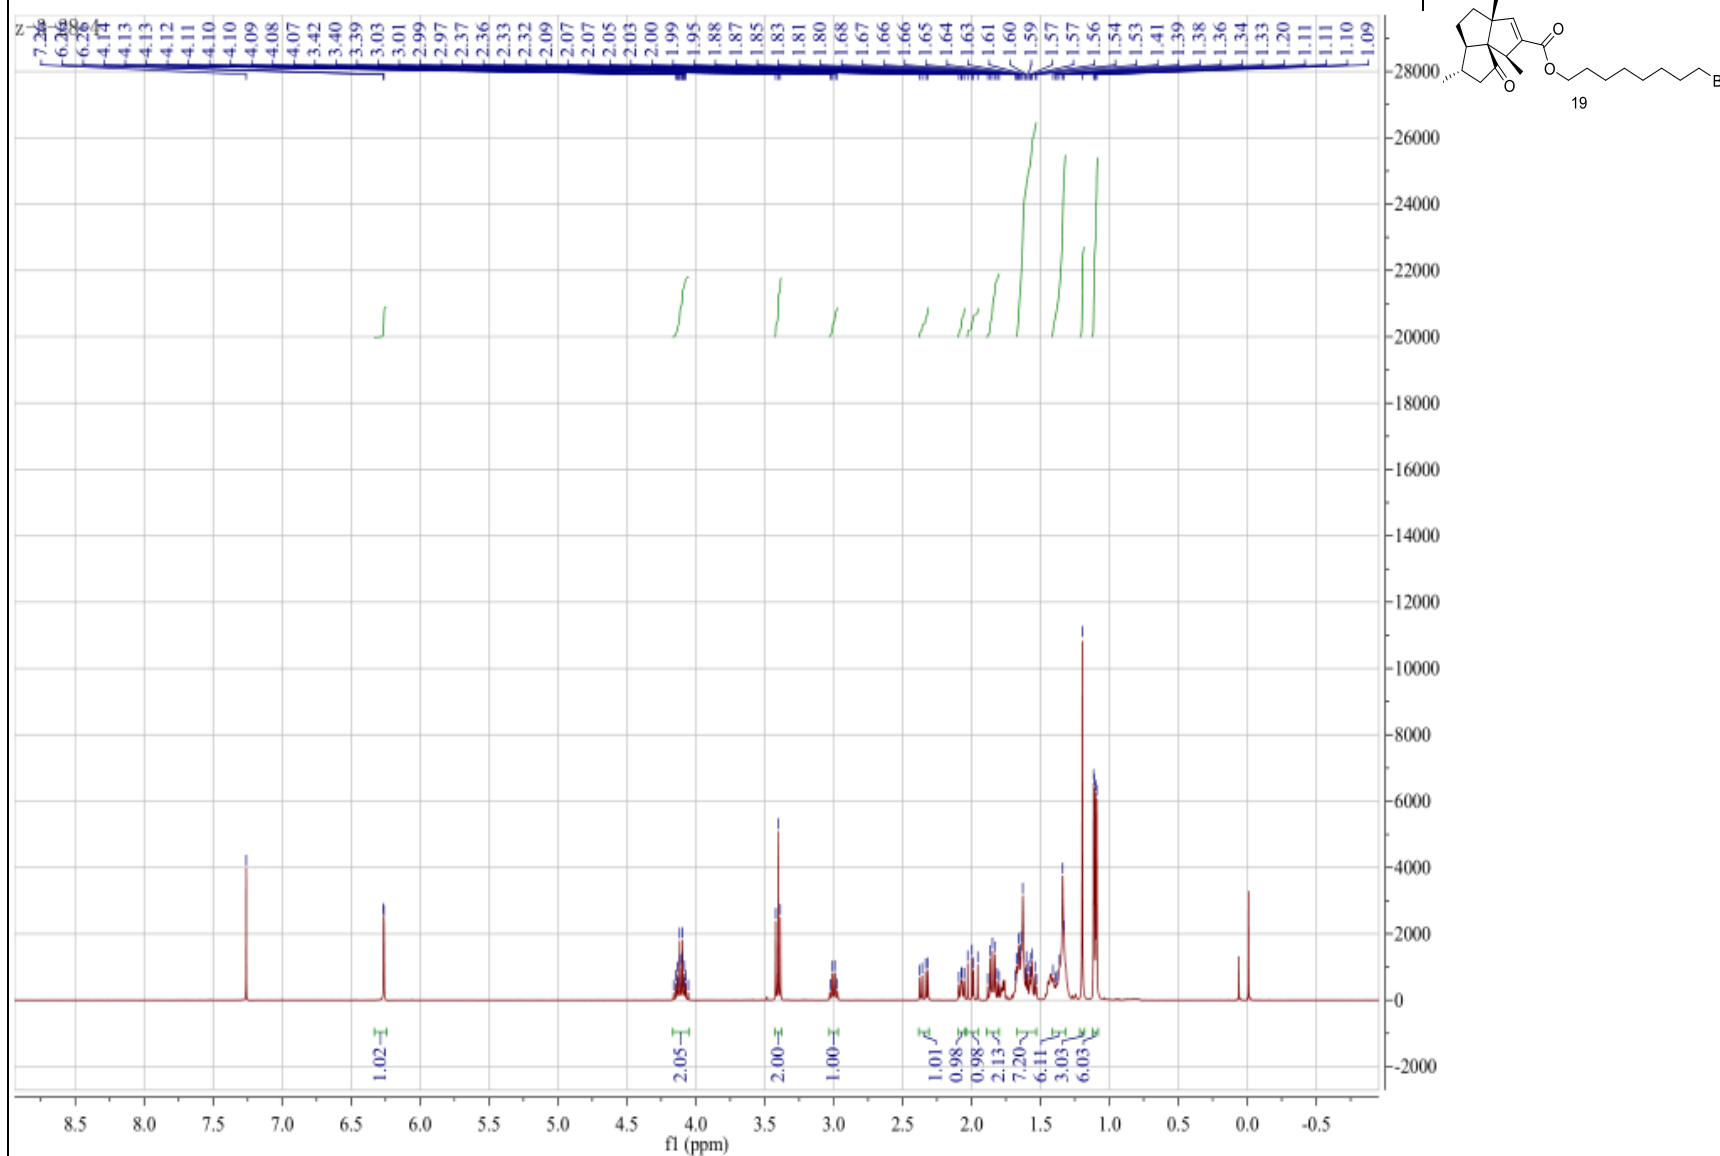

**Figure S43.**  $^{13}\text{C}$  NMR (100 MHz,  $\text{CDCl}_3$ ) of compound **19**

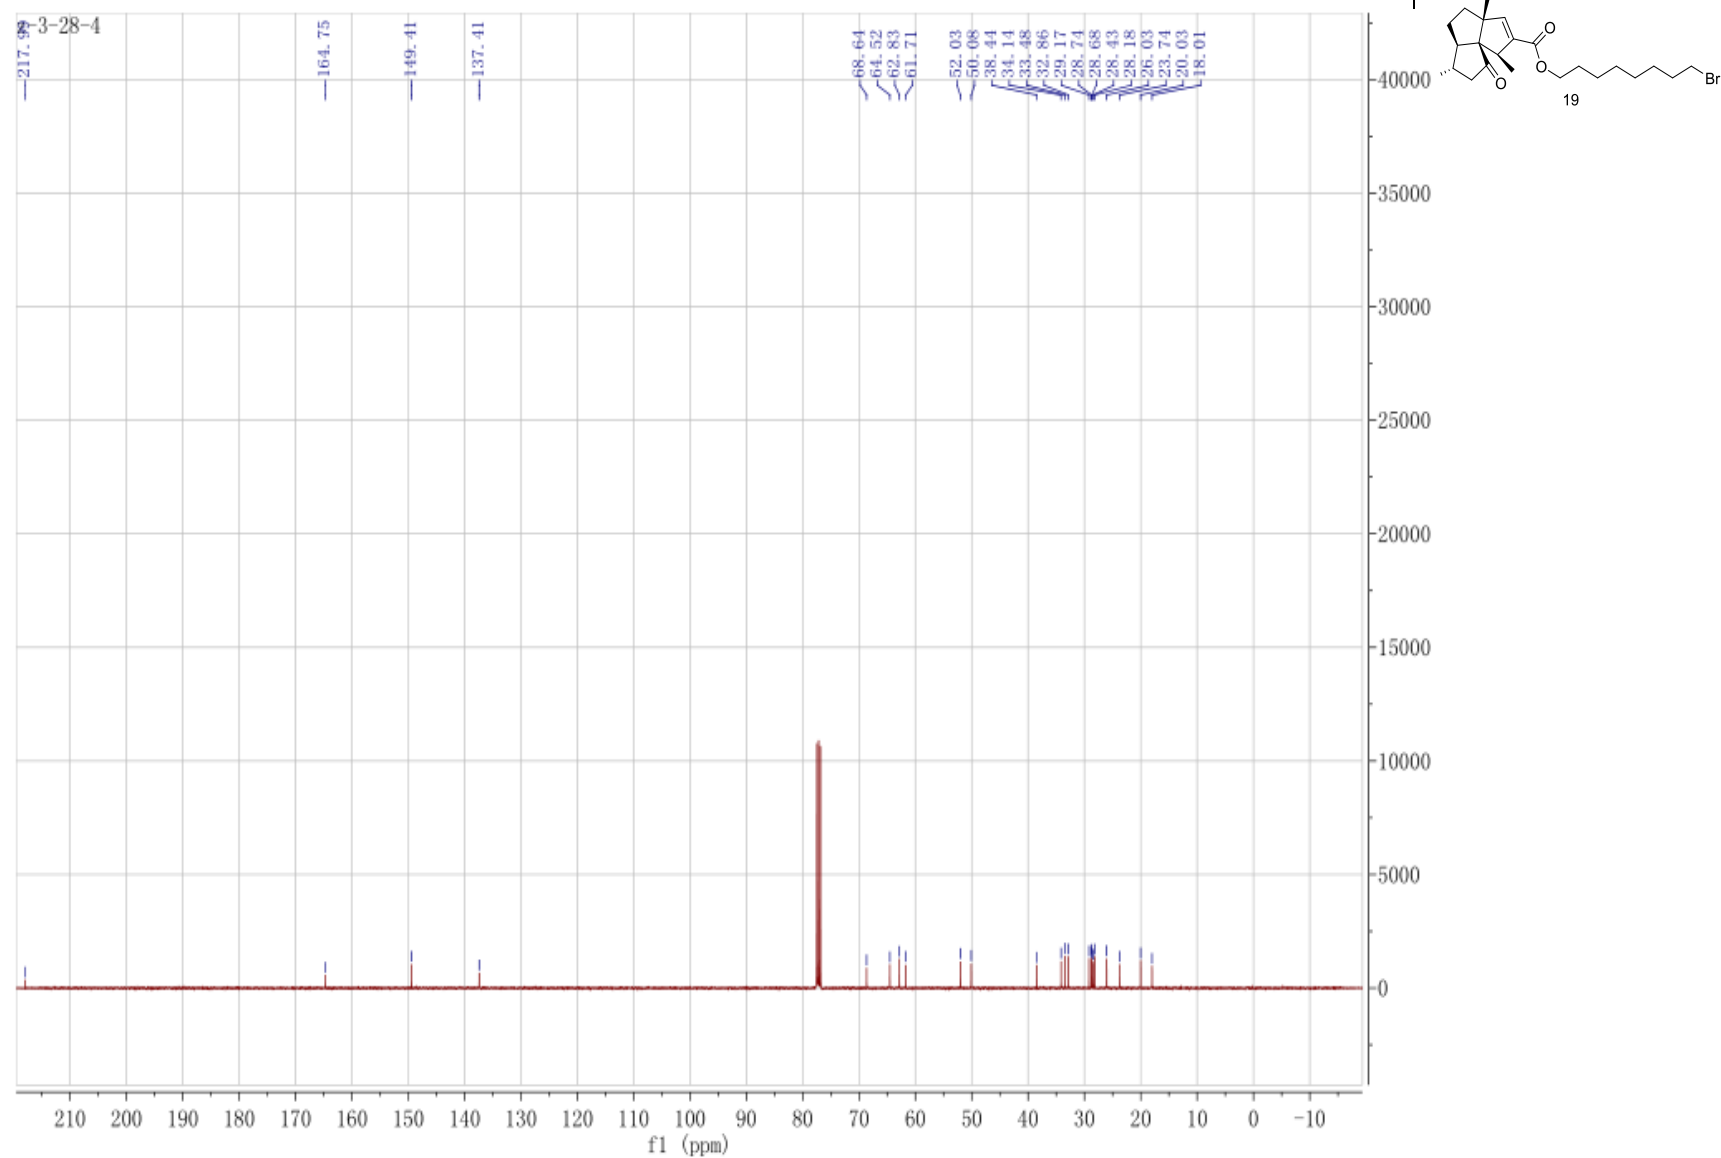

**Figure S44.**  $^1\text{H}$  NMR (400 MHz,  $\text{CDCl}_3$ ) of compound **20**

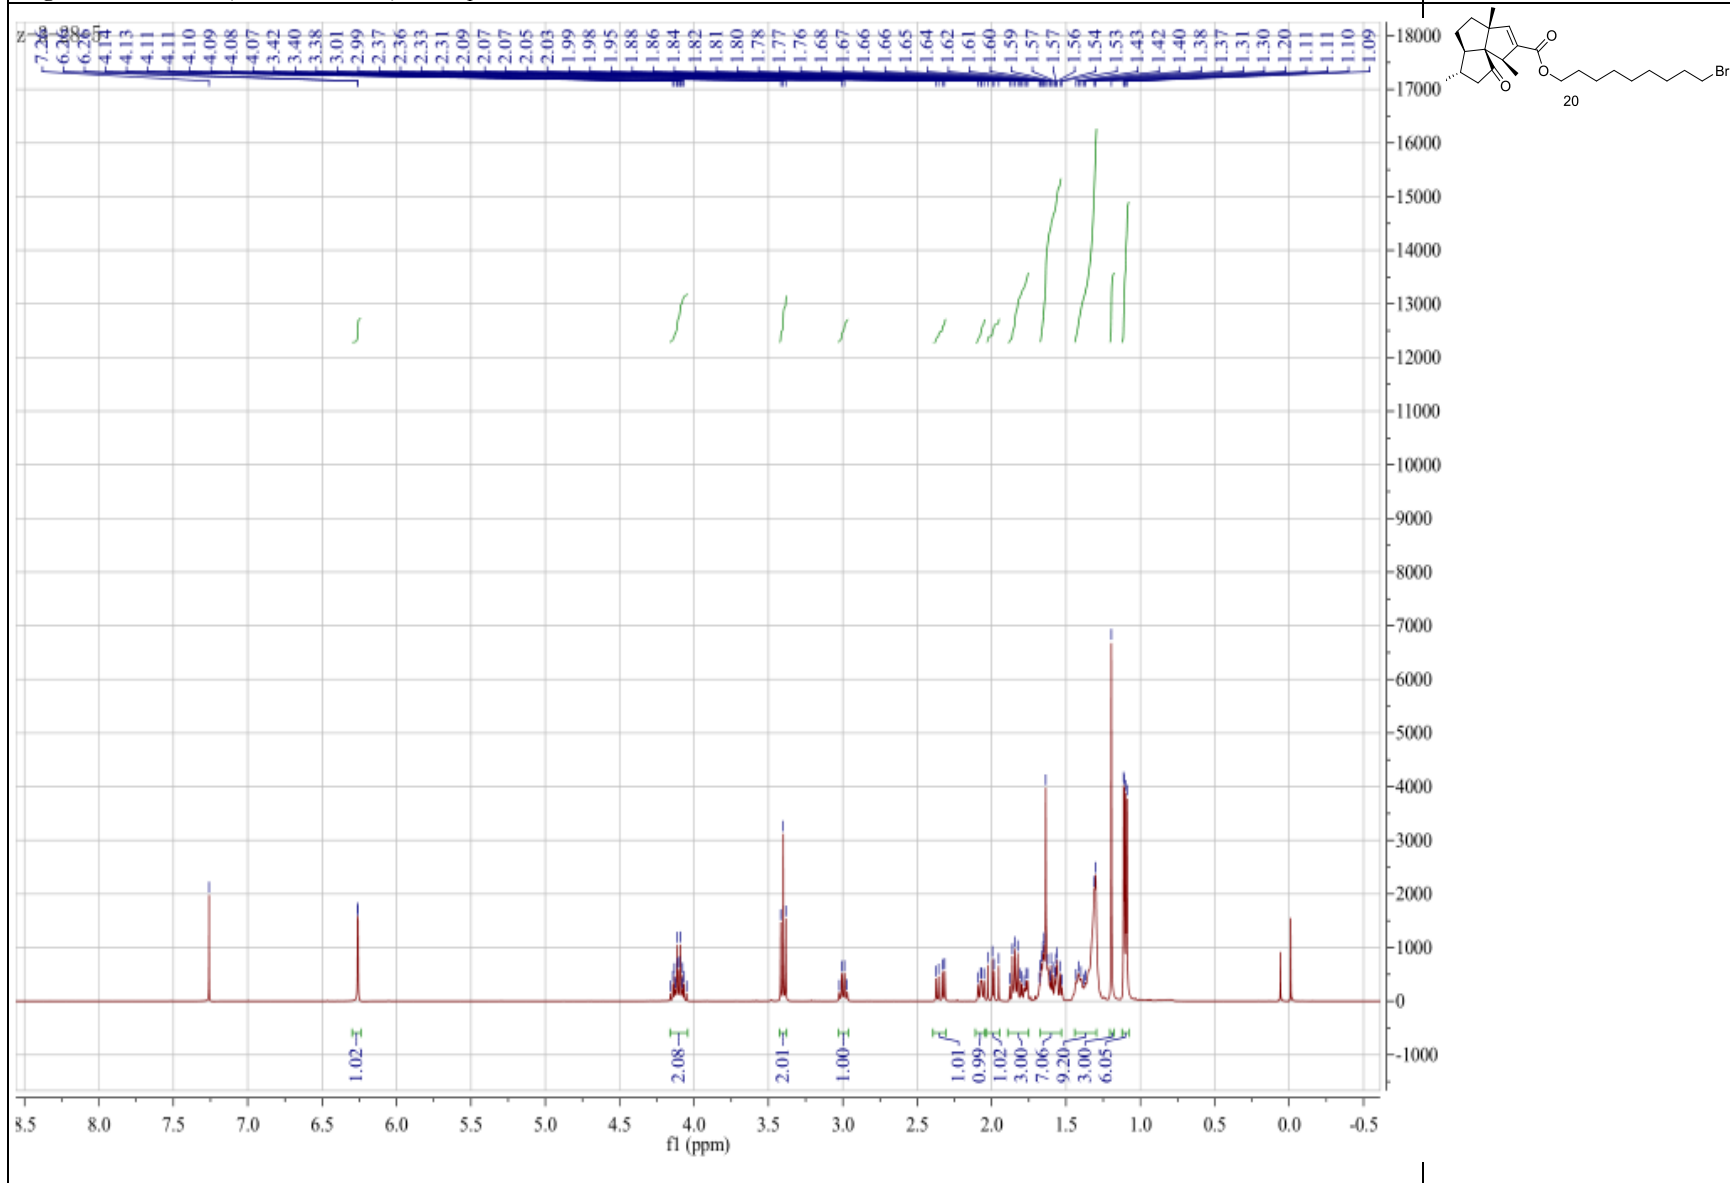

**Figure S45.**  $^{13}\text{C}$  NMR (100 MHz,  $\text{CDCl}_3$ ) of compound **20**

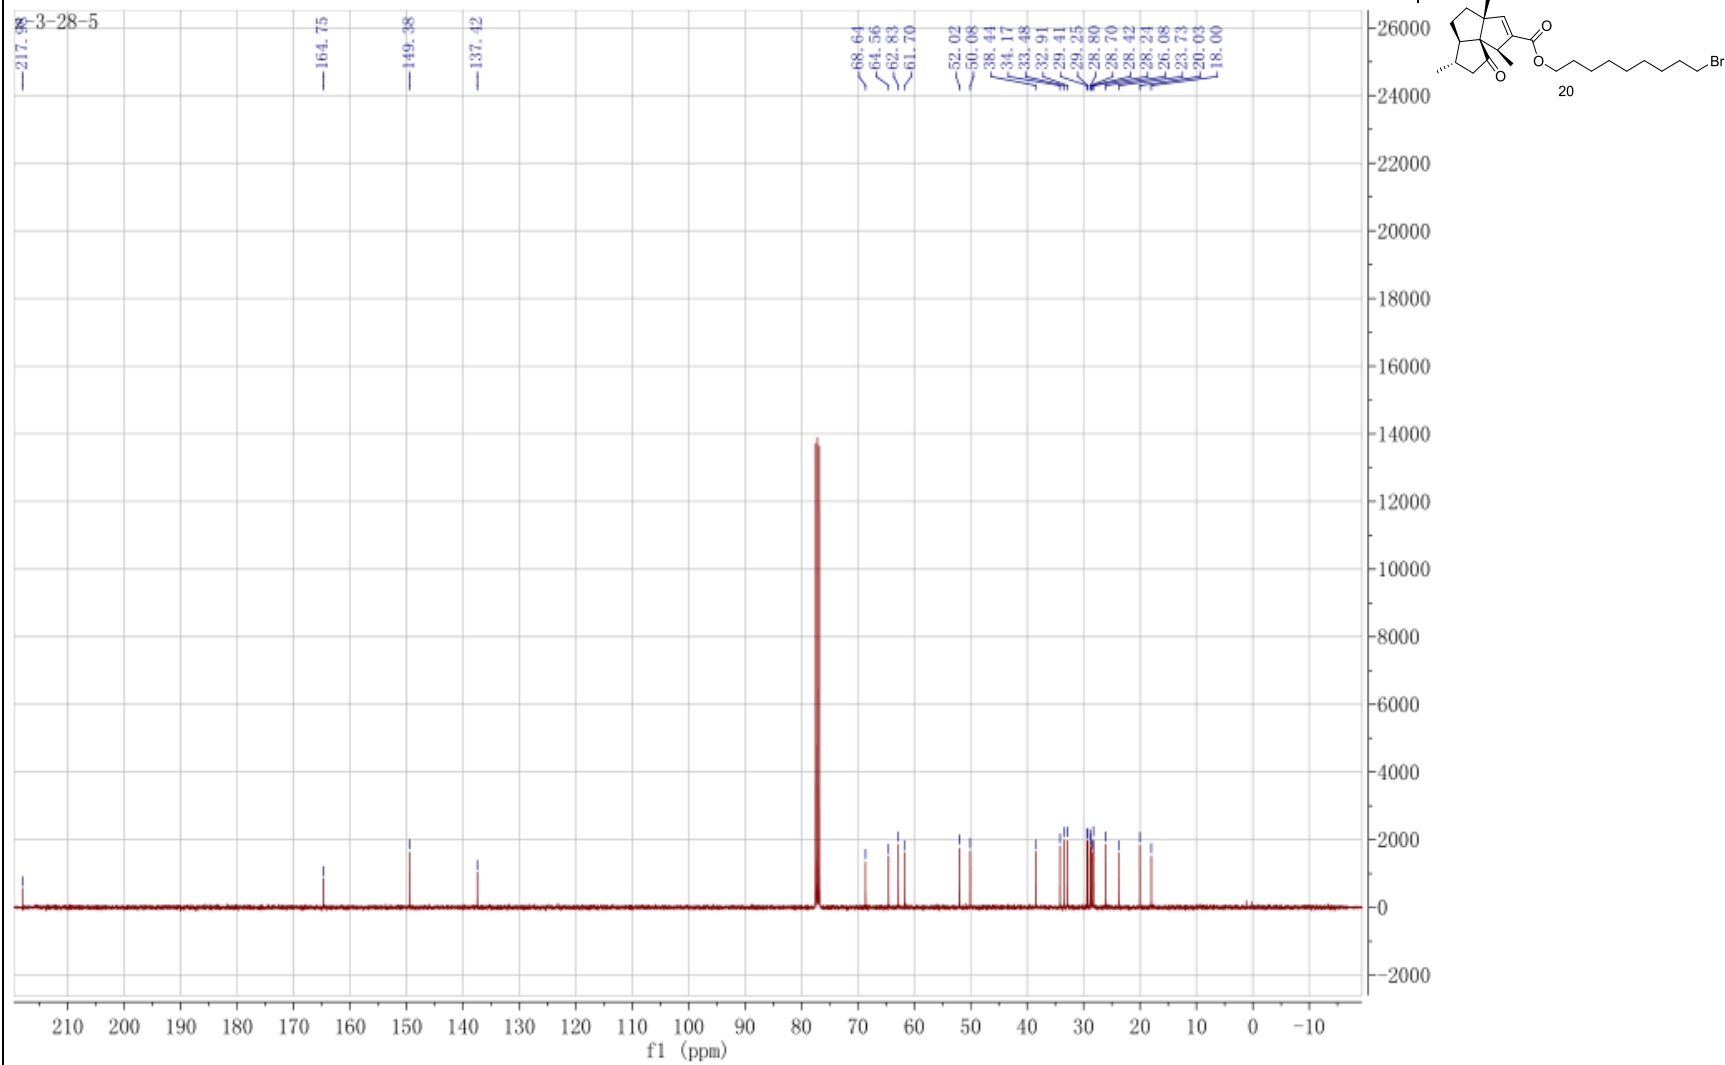

**Figure S46.**  $^1\text{H}$  NMR (300 MHz,  $\text{CDCl}_3$ ) of compound **21**

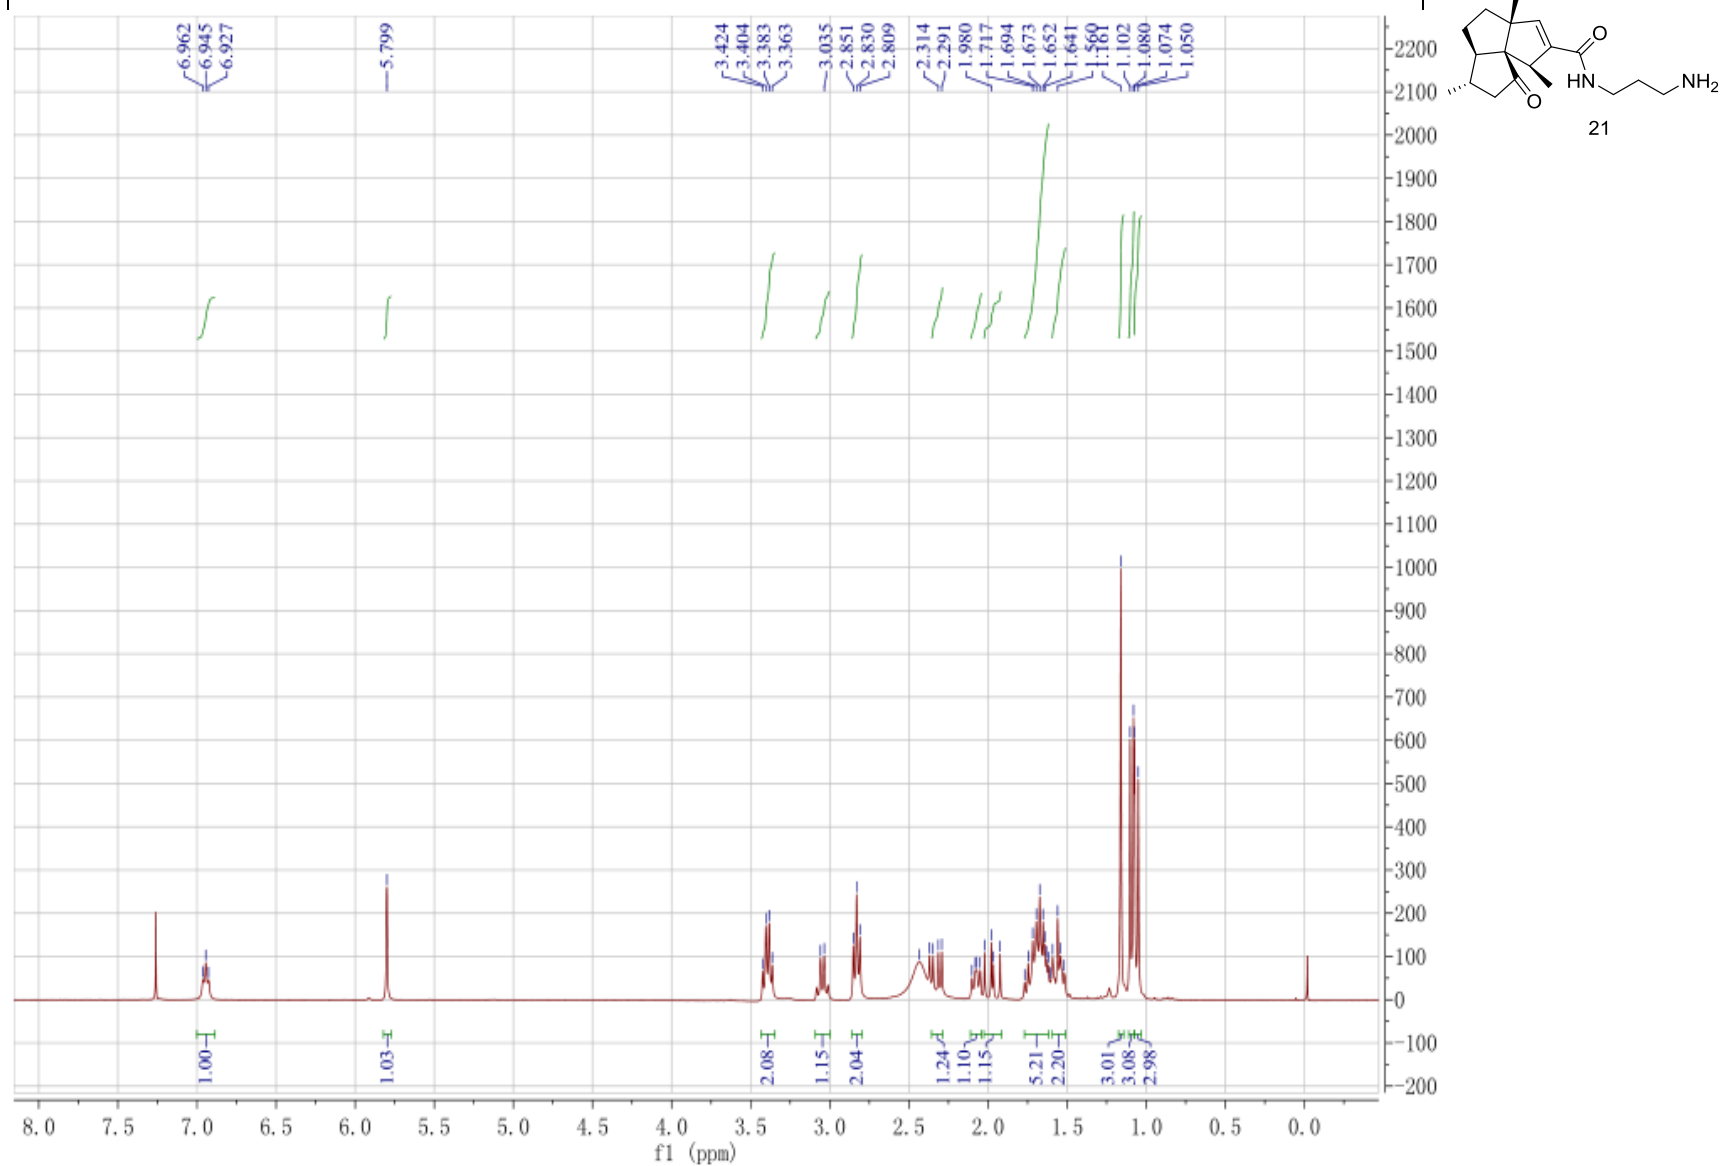



**Figure S47.**  $^{13}\text{C}$  NMR (75 MHz,  $\text{CDCl}_3$ ) of compound **21**

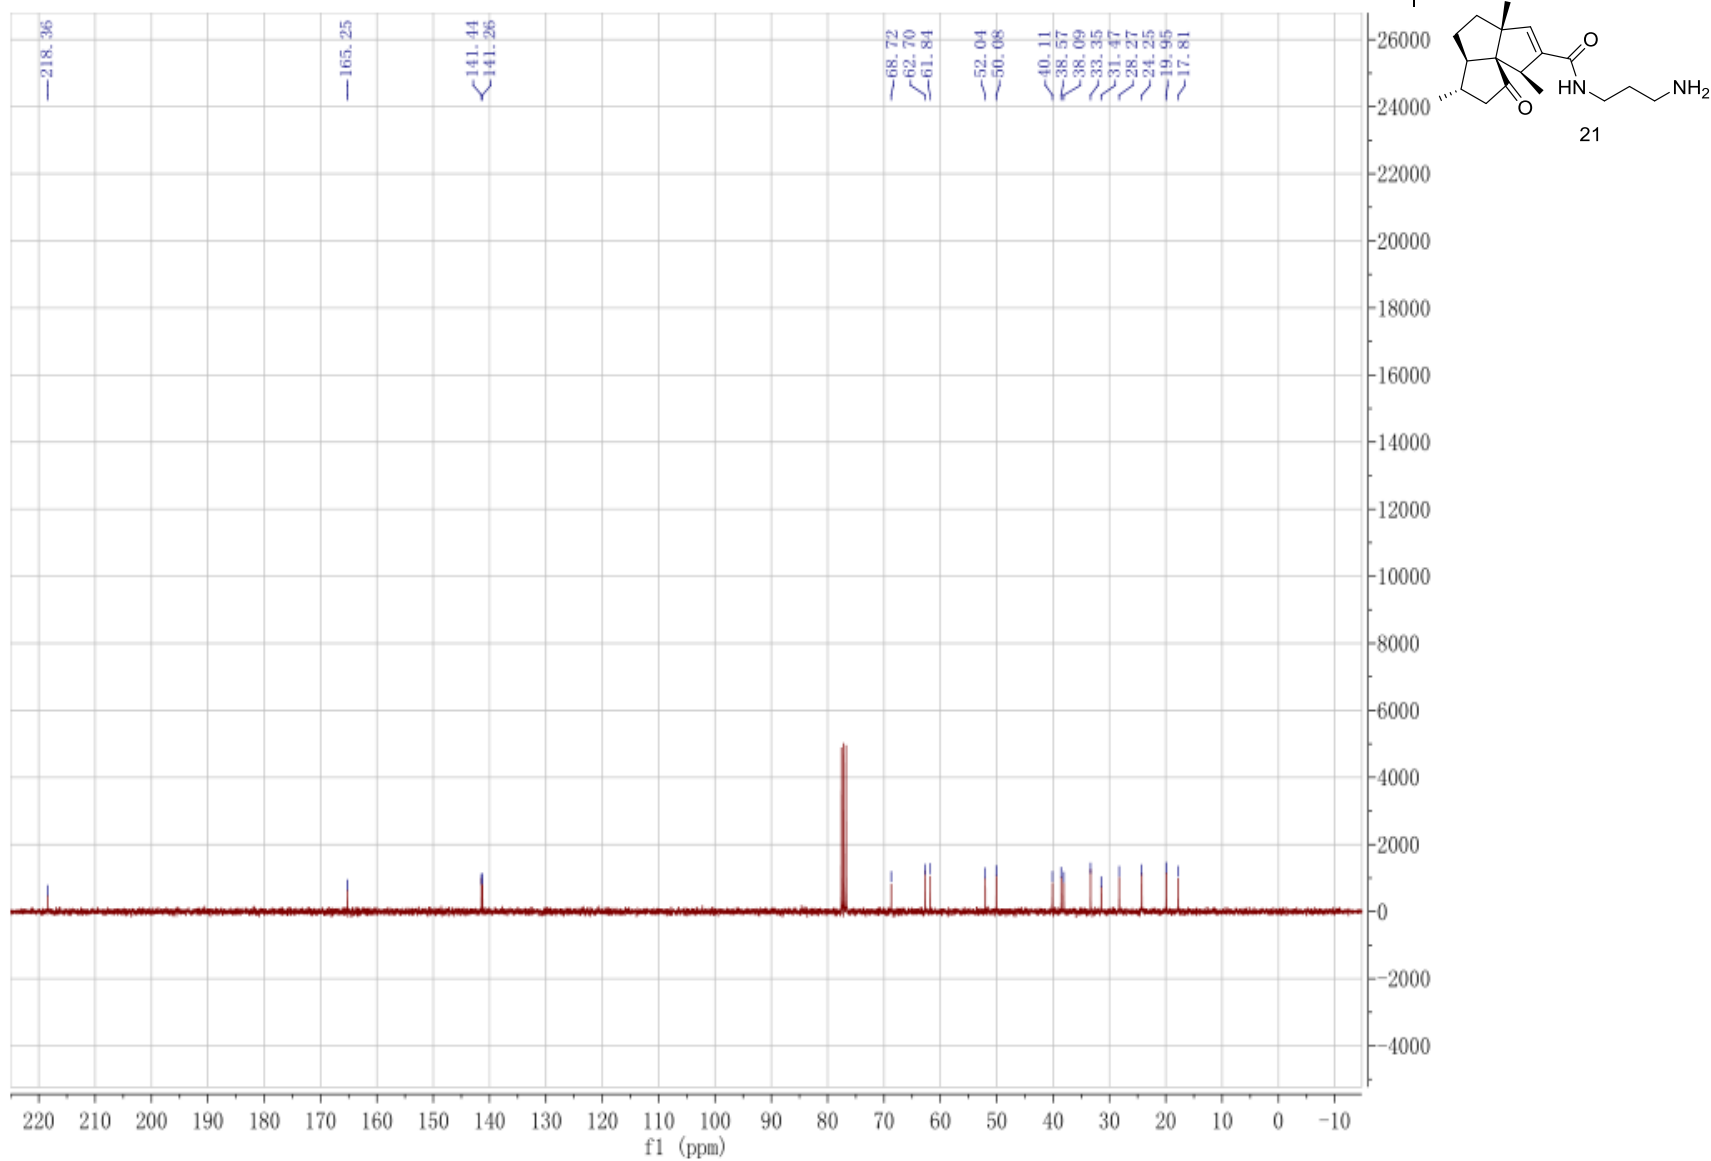

**Figure S48.**  $^1\text{H}$  NMR (300 MHz,  $\text{CDCl}_3$ ) of compound **22**

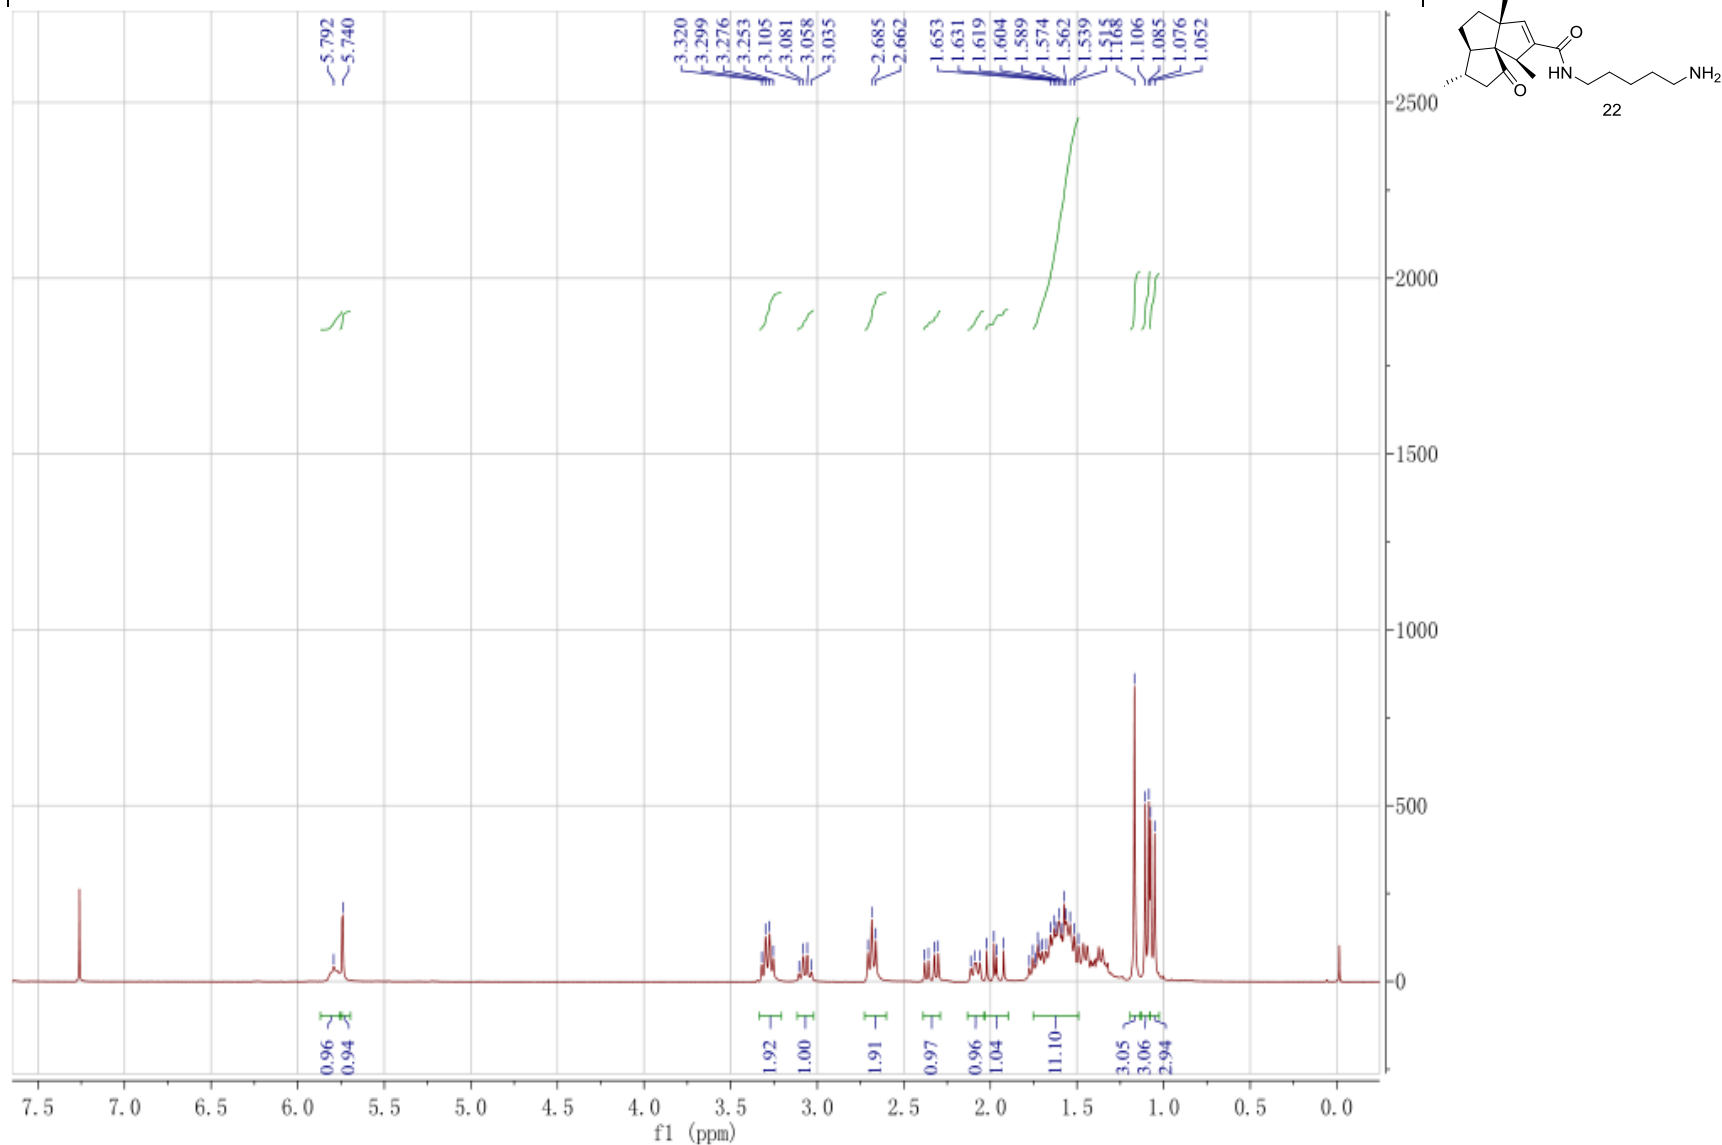

Figure S49.  $^{13}\text{C}$  NMR (75 MHz,  $\text{CDCl}_3$ ) of compound 22

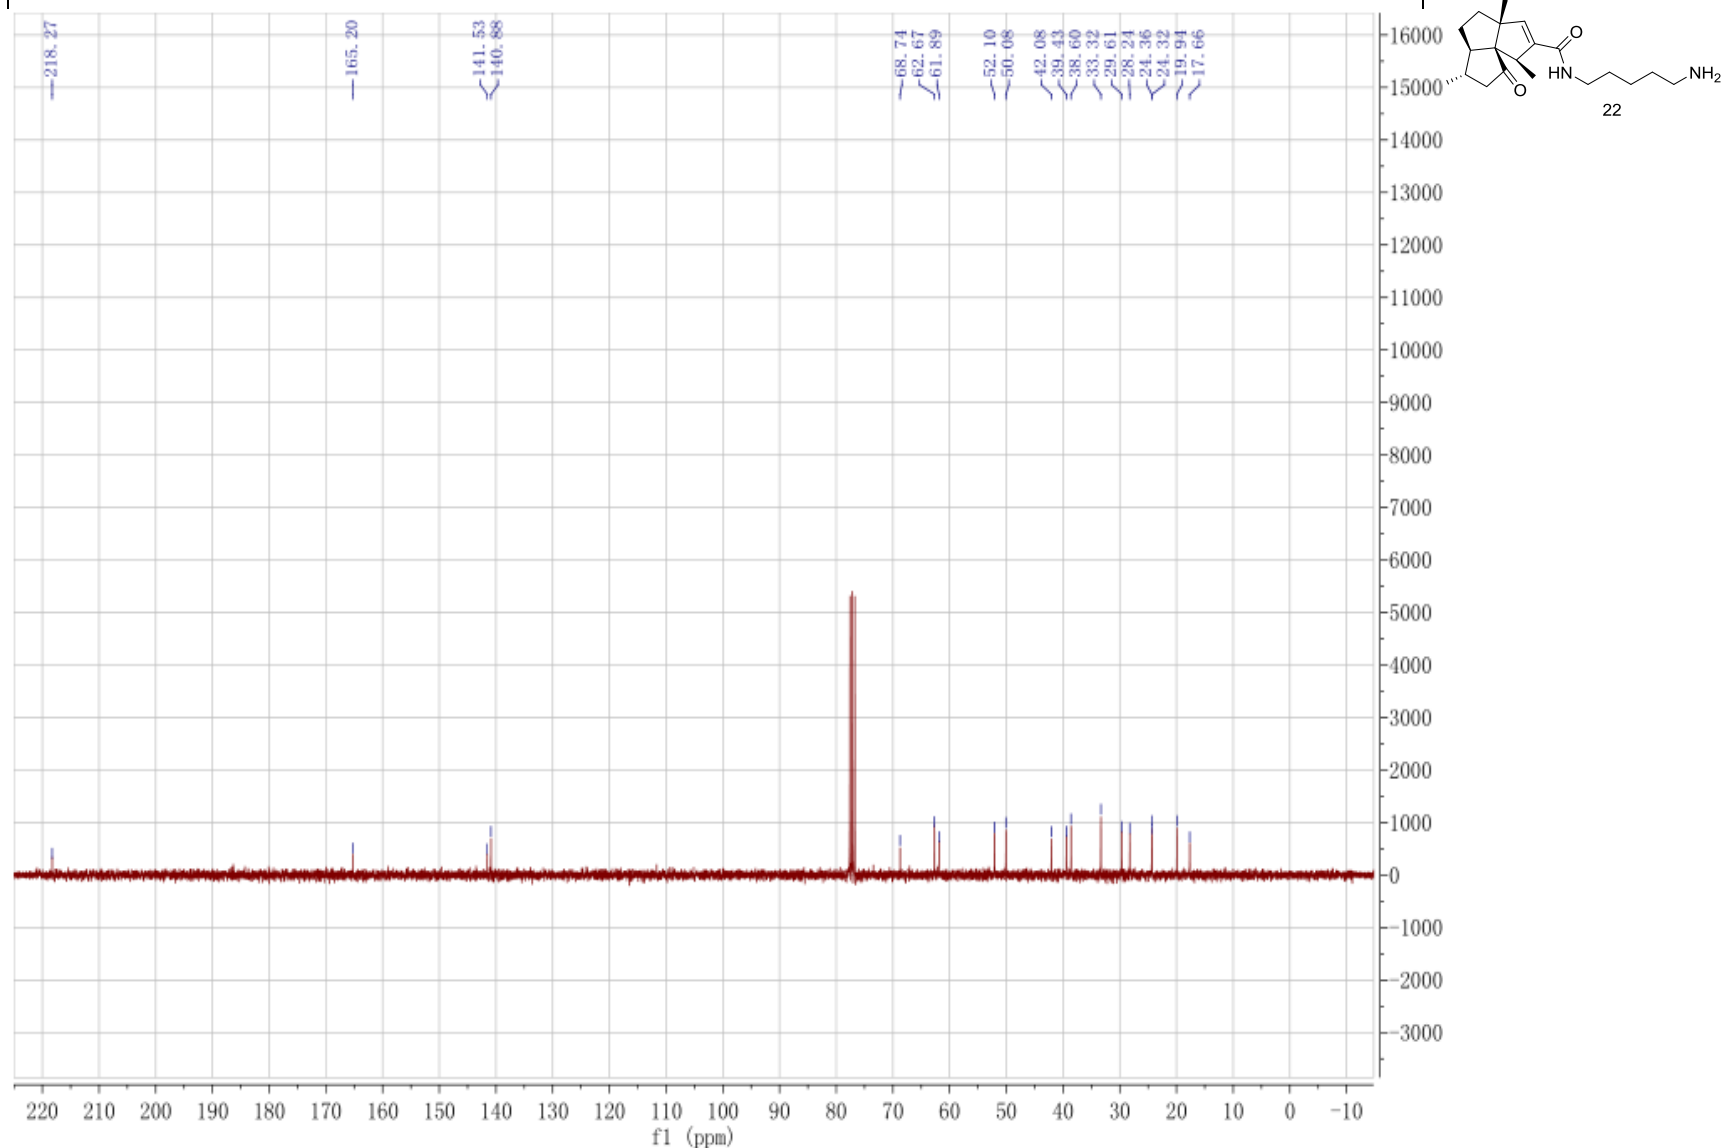

**Figure S50.**  $^1\text{H}$  NMR (300 MHz,  $\text{CDCl}_3$ ) of compound **23**

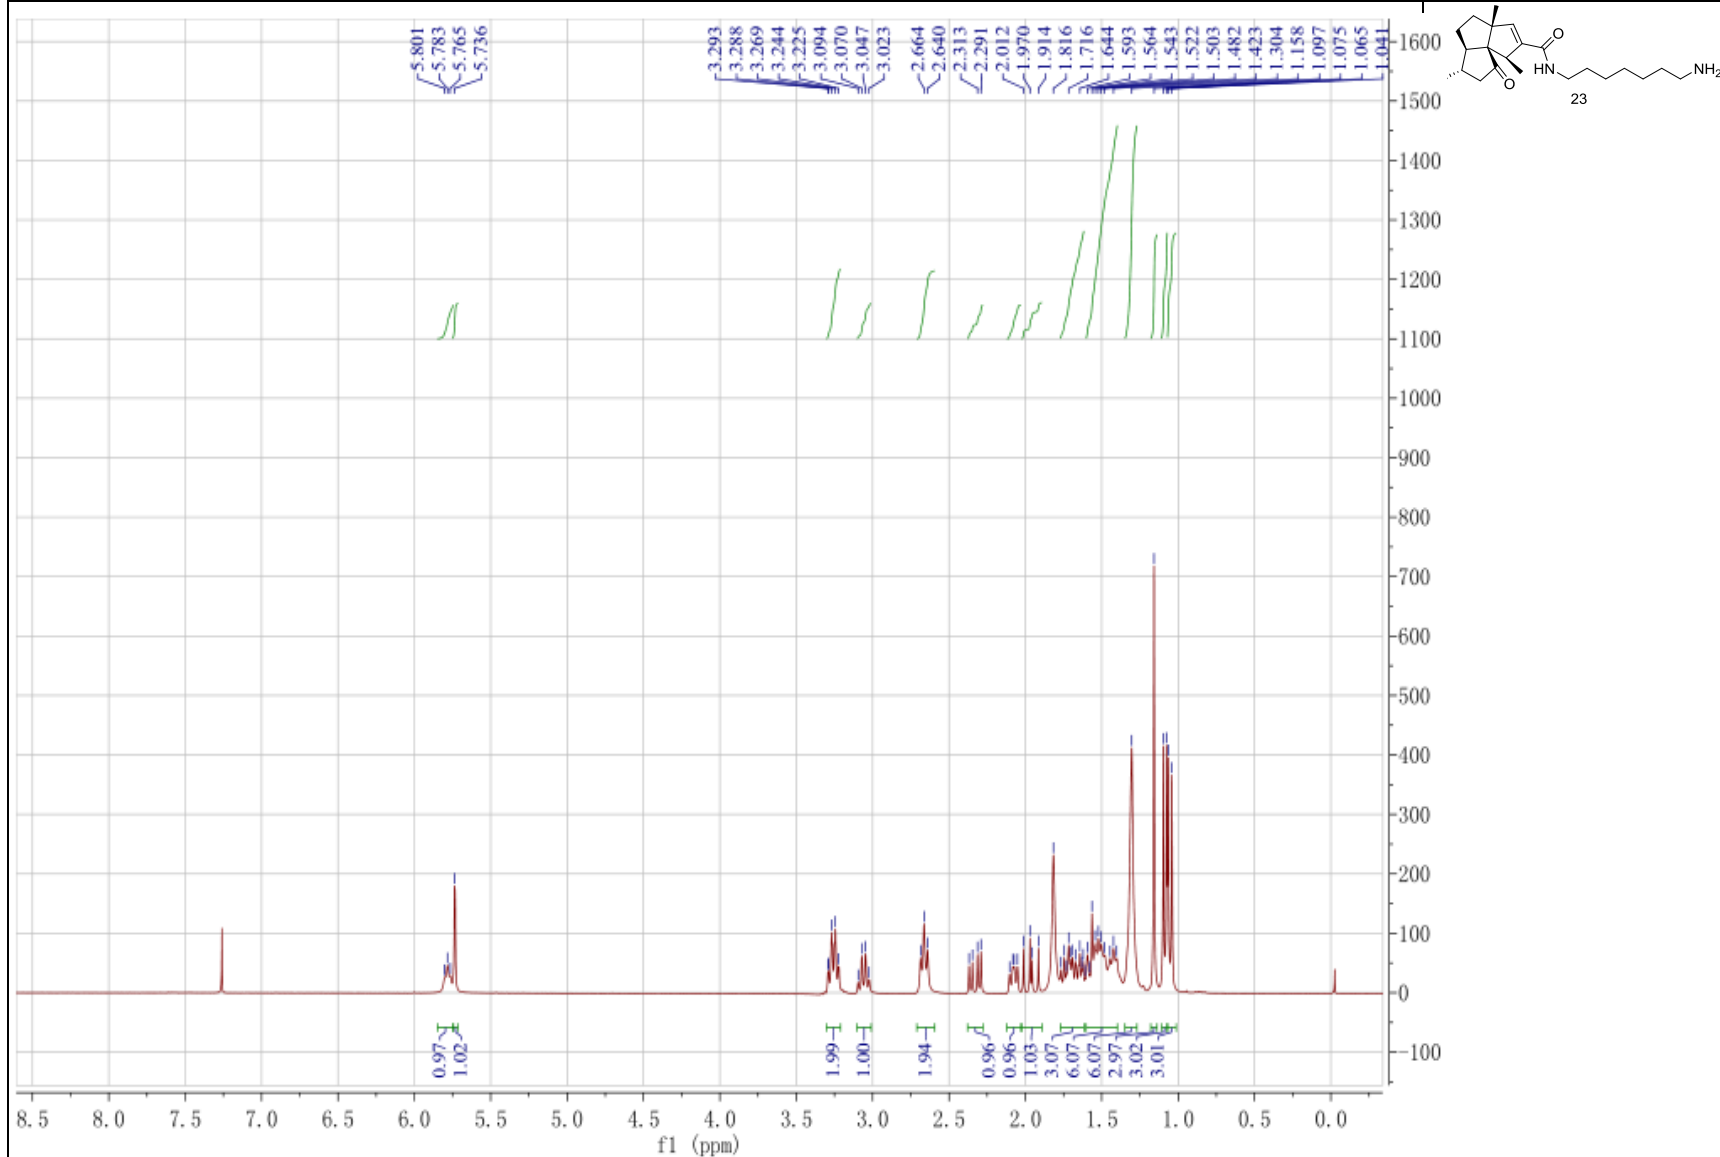

**Figure S51.**  $^{13}\text{C}$  NMR (75 MHz,  $\text{CDCl}_3$ ) of compound **23**

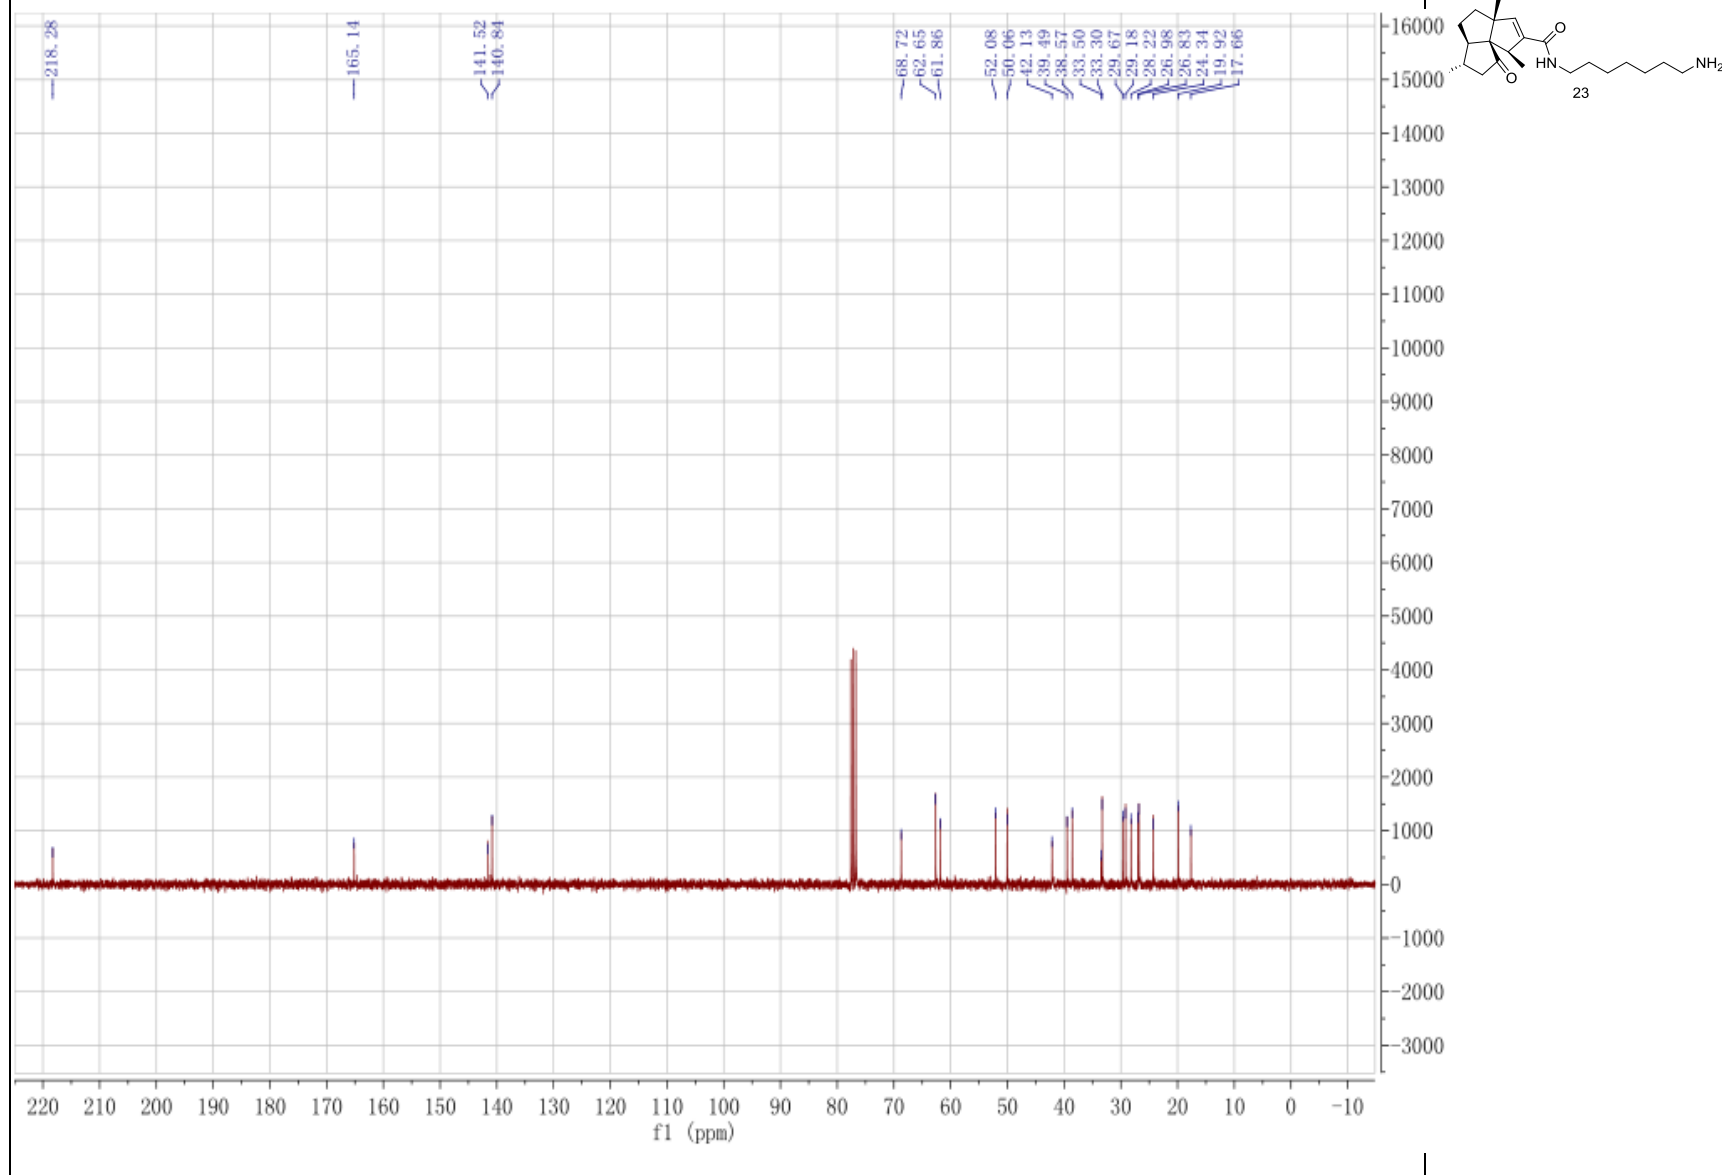

**Figure S52.**  $^1\text{H}$  NMR (300 MHz,  $\text{CDCl}_3$ ) of compound **24**

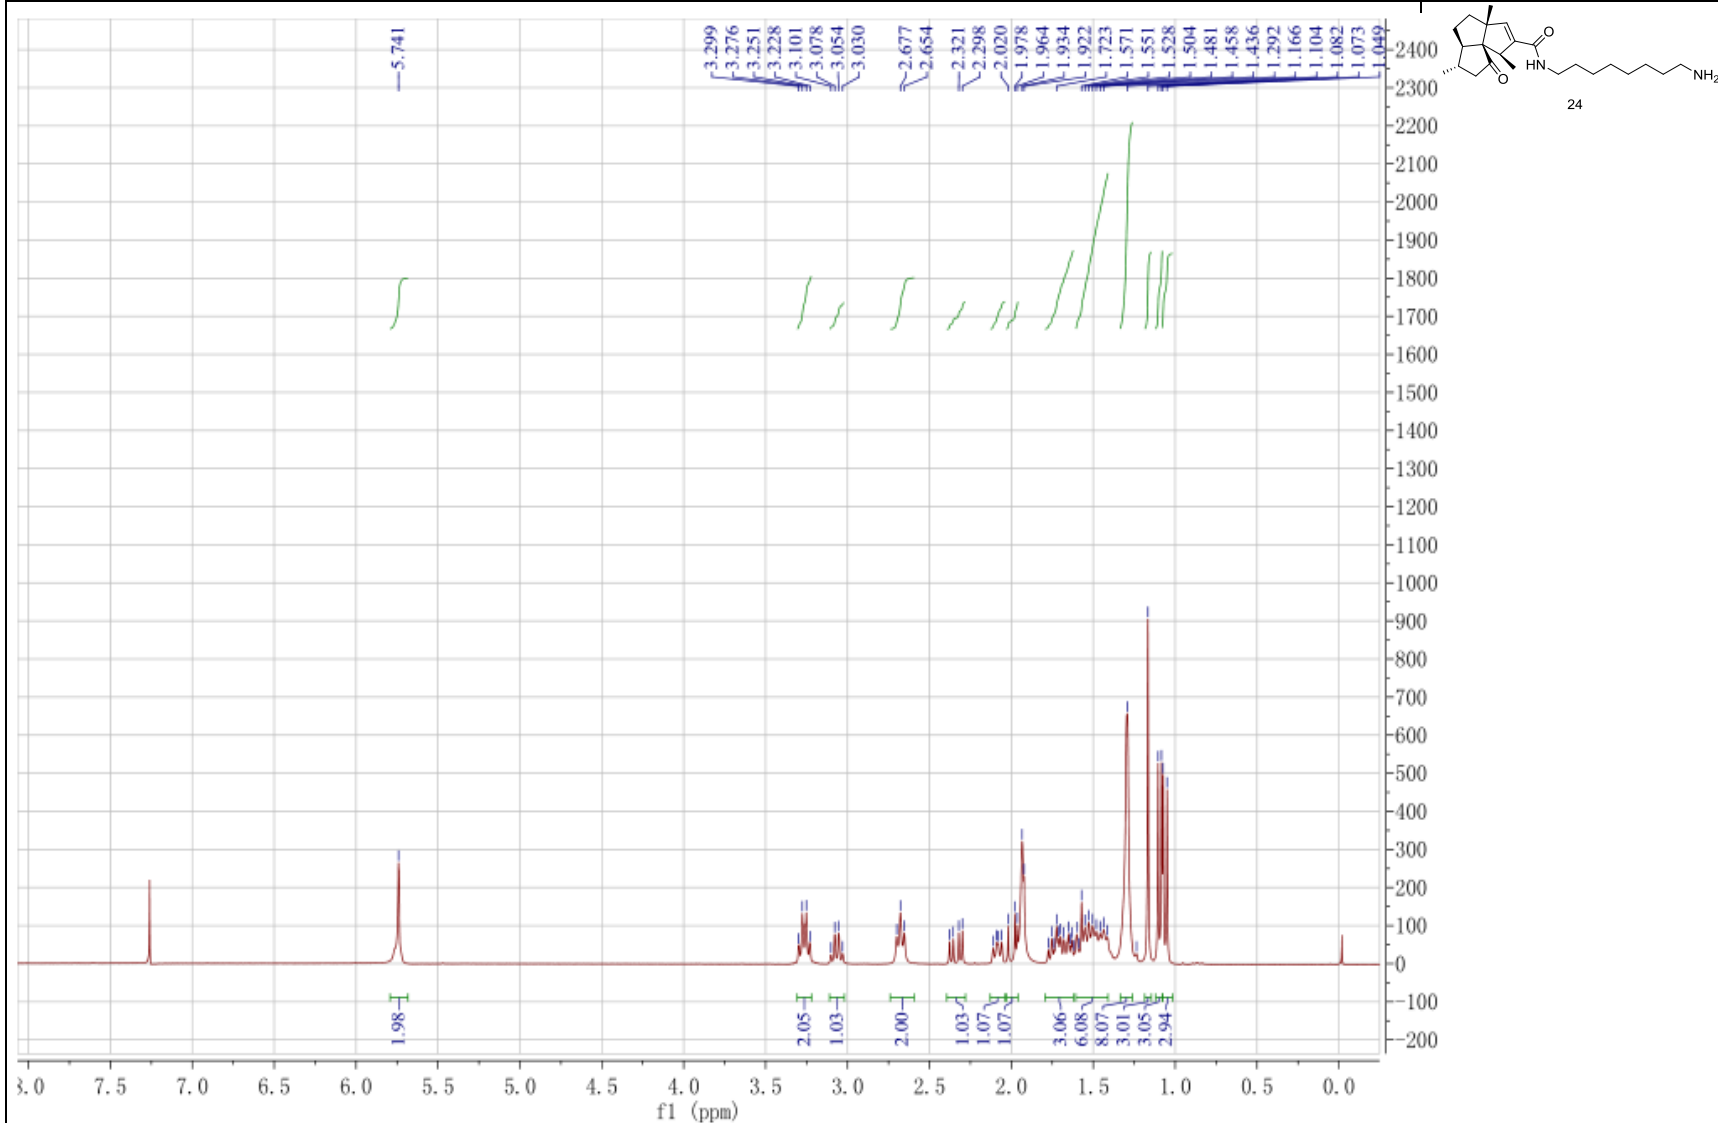

**Figure S53.**  $^{13}\text{C}$  NMR (75 MHz,  $\text{CDCl}_3$ ) of compound **24**

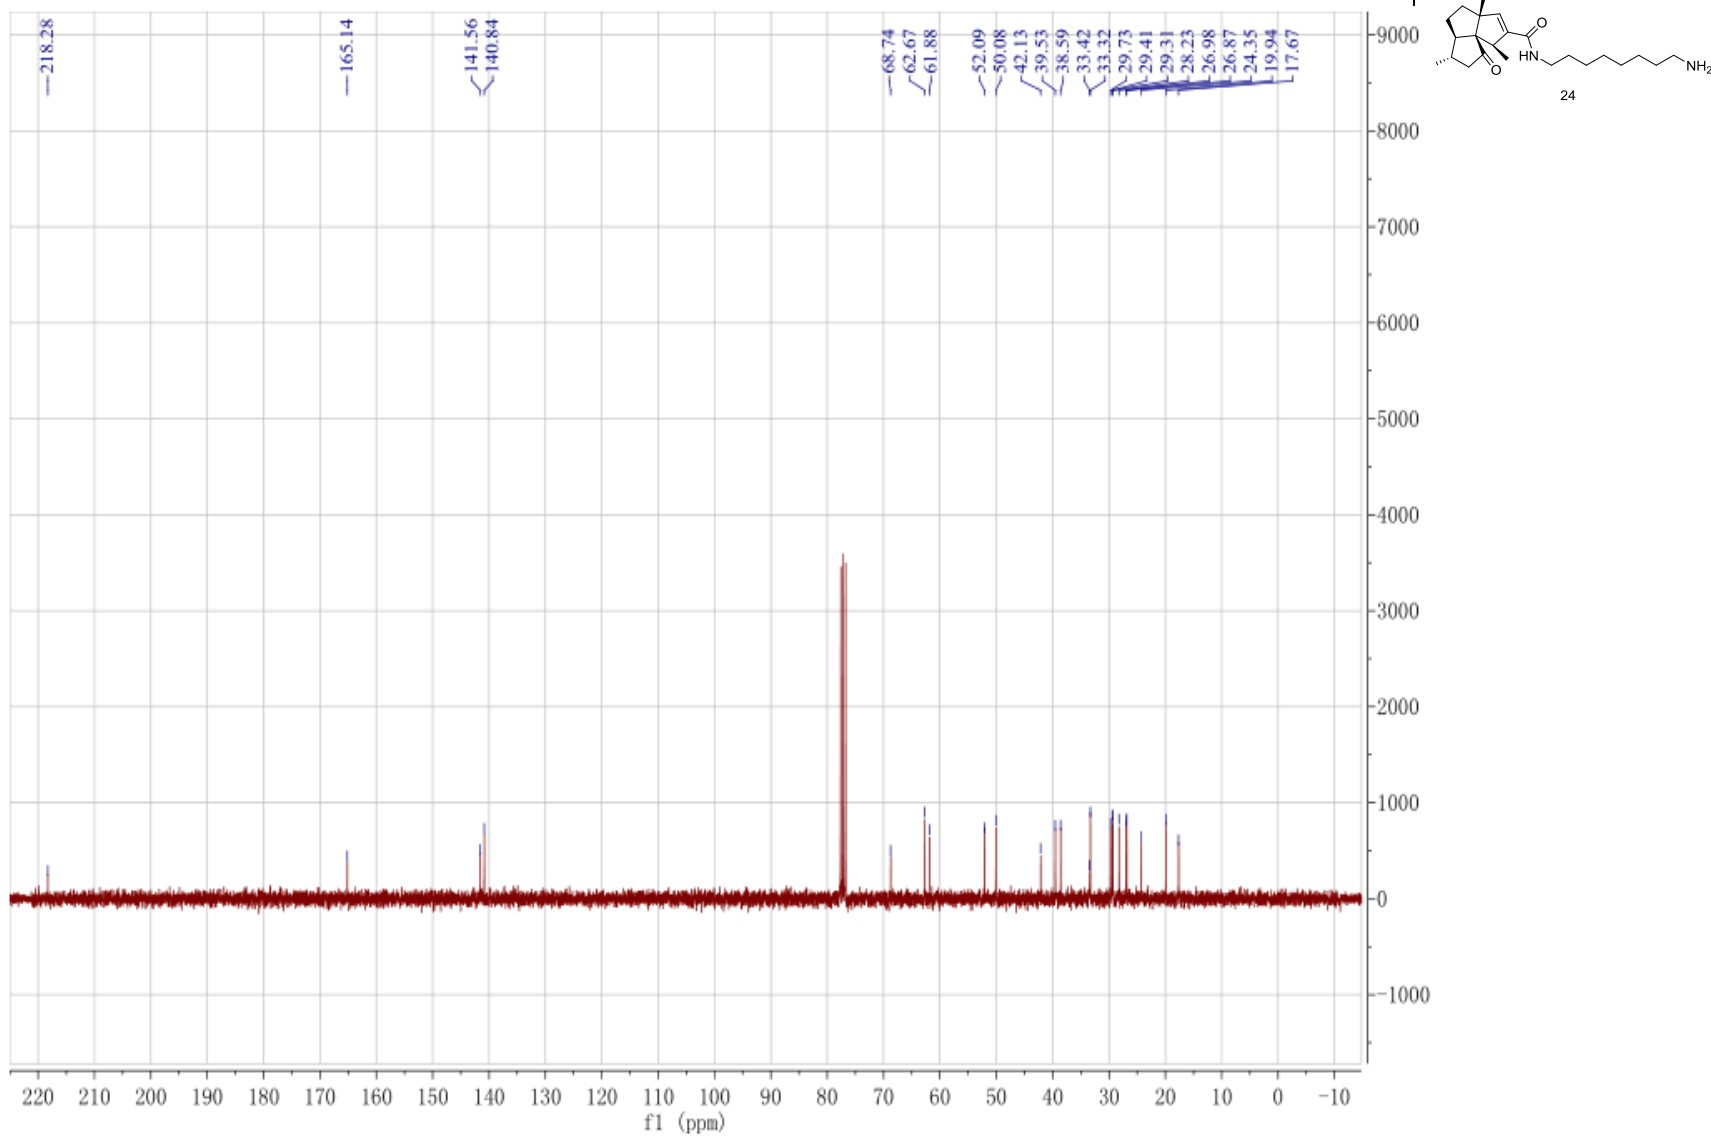

**Figure S54.**  $^1\text{H}$  NMR (300 MHz,  $\text{CDCl}_3$ ) of compound **25**

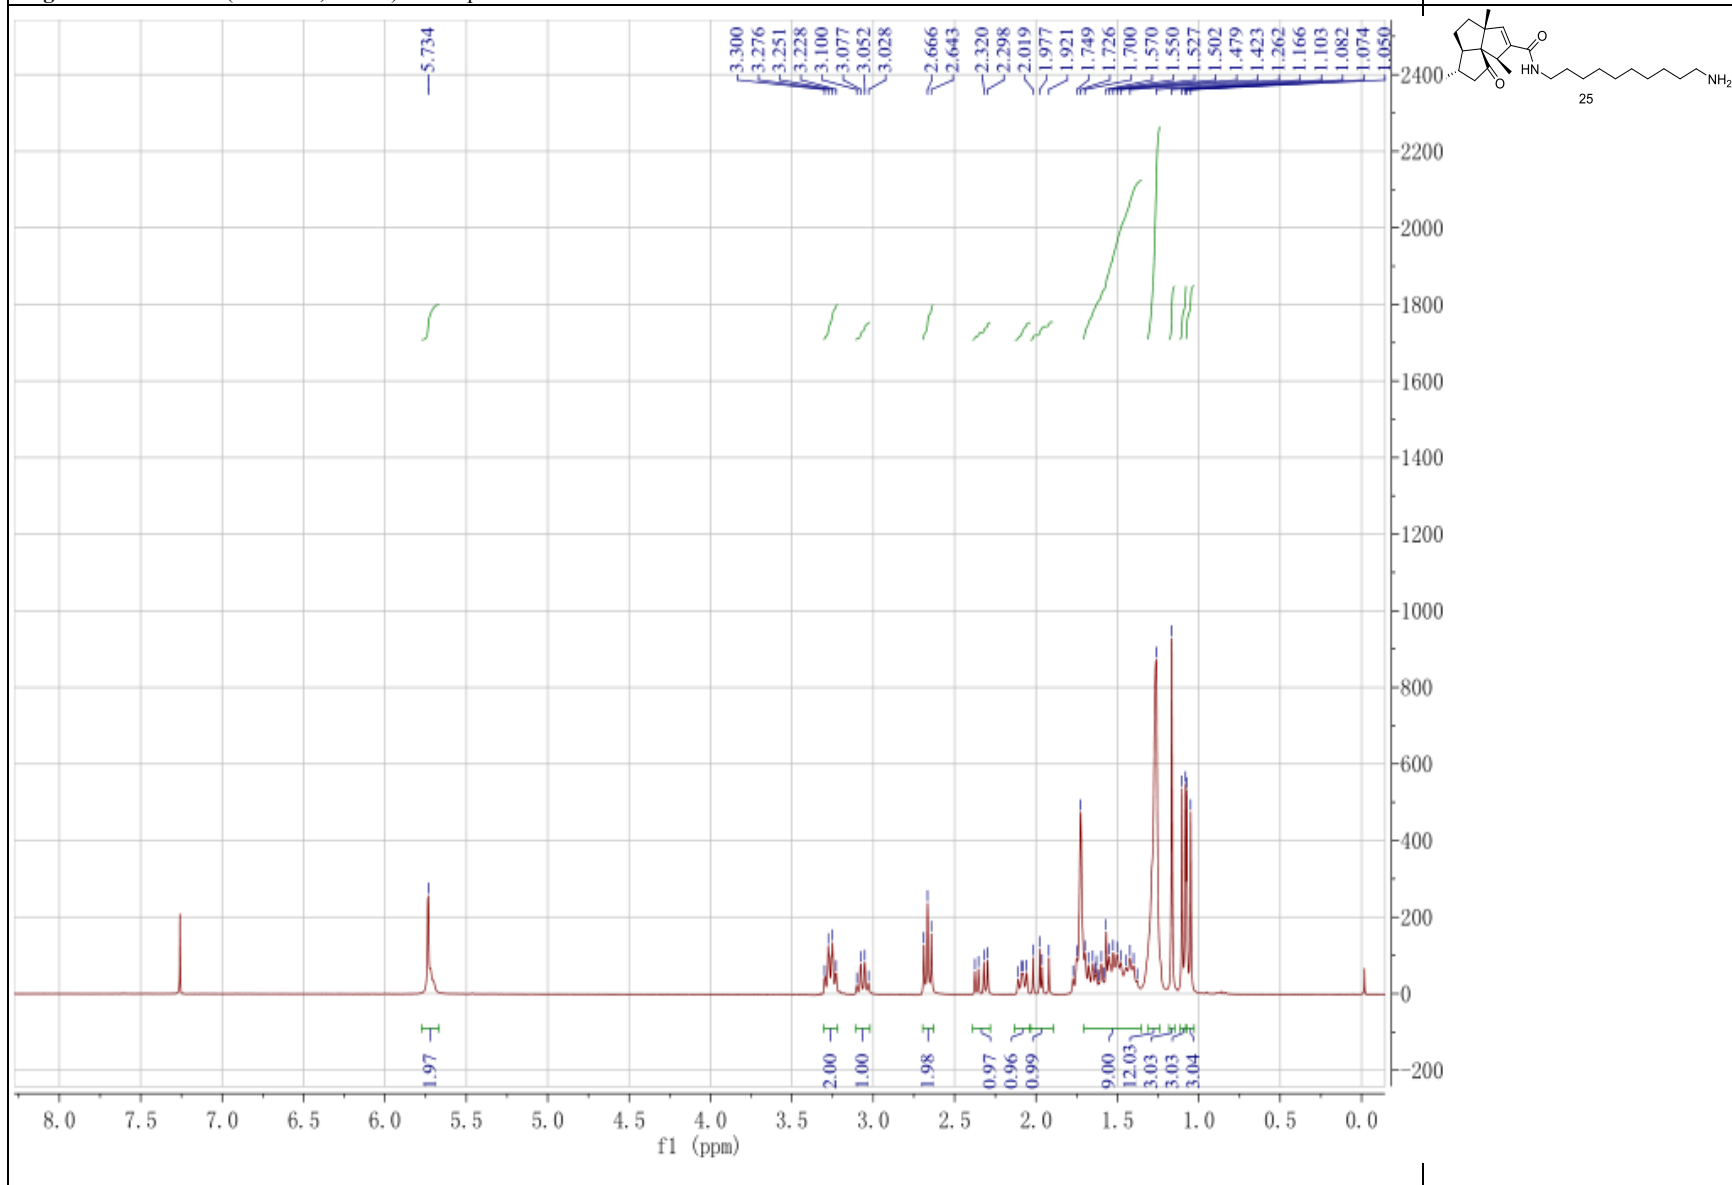



Figure S55.  $^{13}\text{C}$  NMR (75 MHz,  $\text{CDCl}_3$ ) of compound **25**

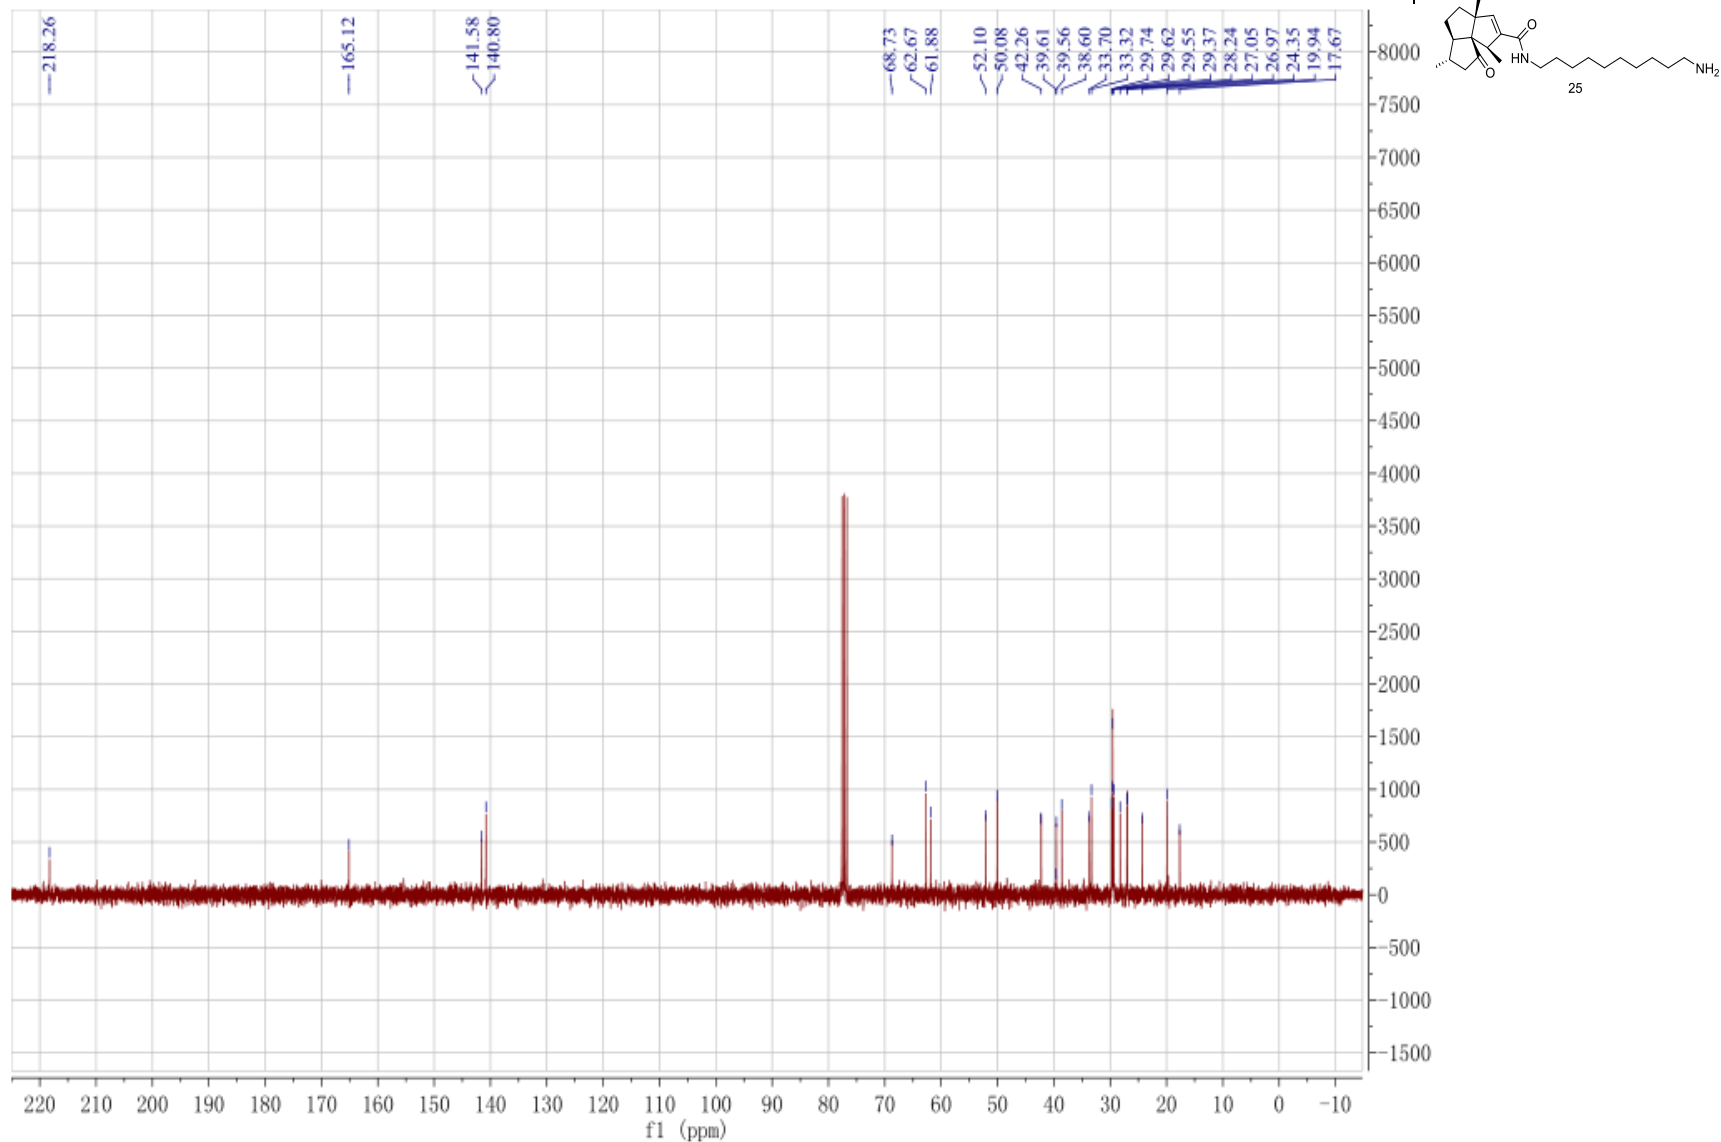

**Figure S56.**  $^1\text{H}$  NMR (300 MHz,  $\text{CDCl}_3$ ) of compound **26**

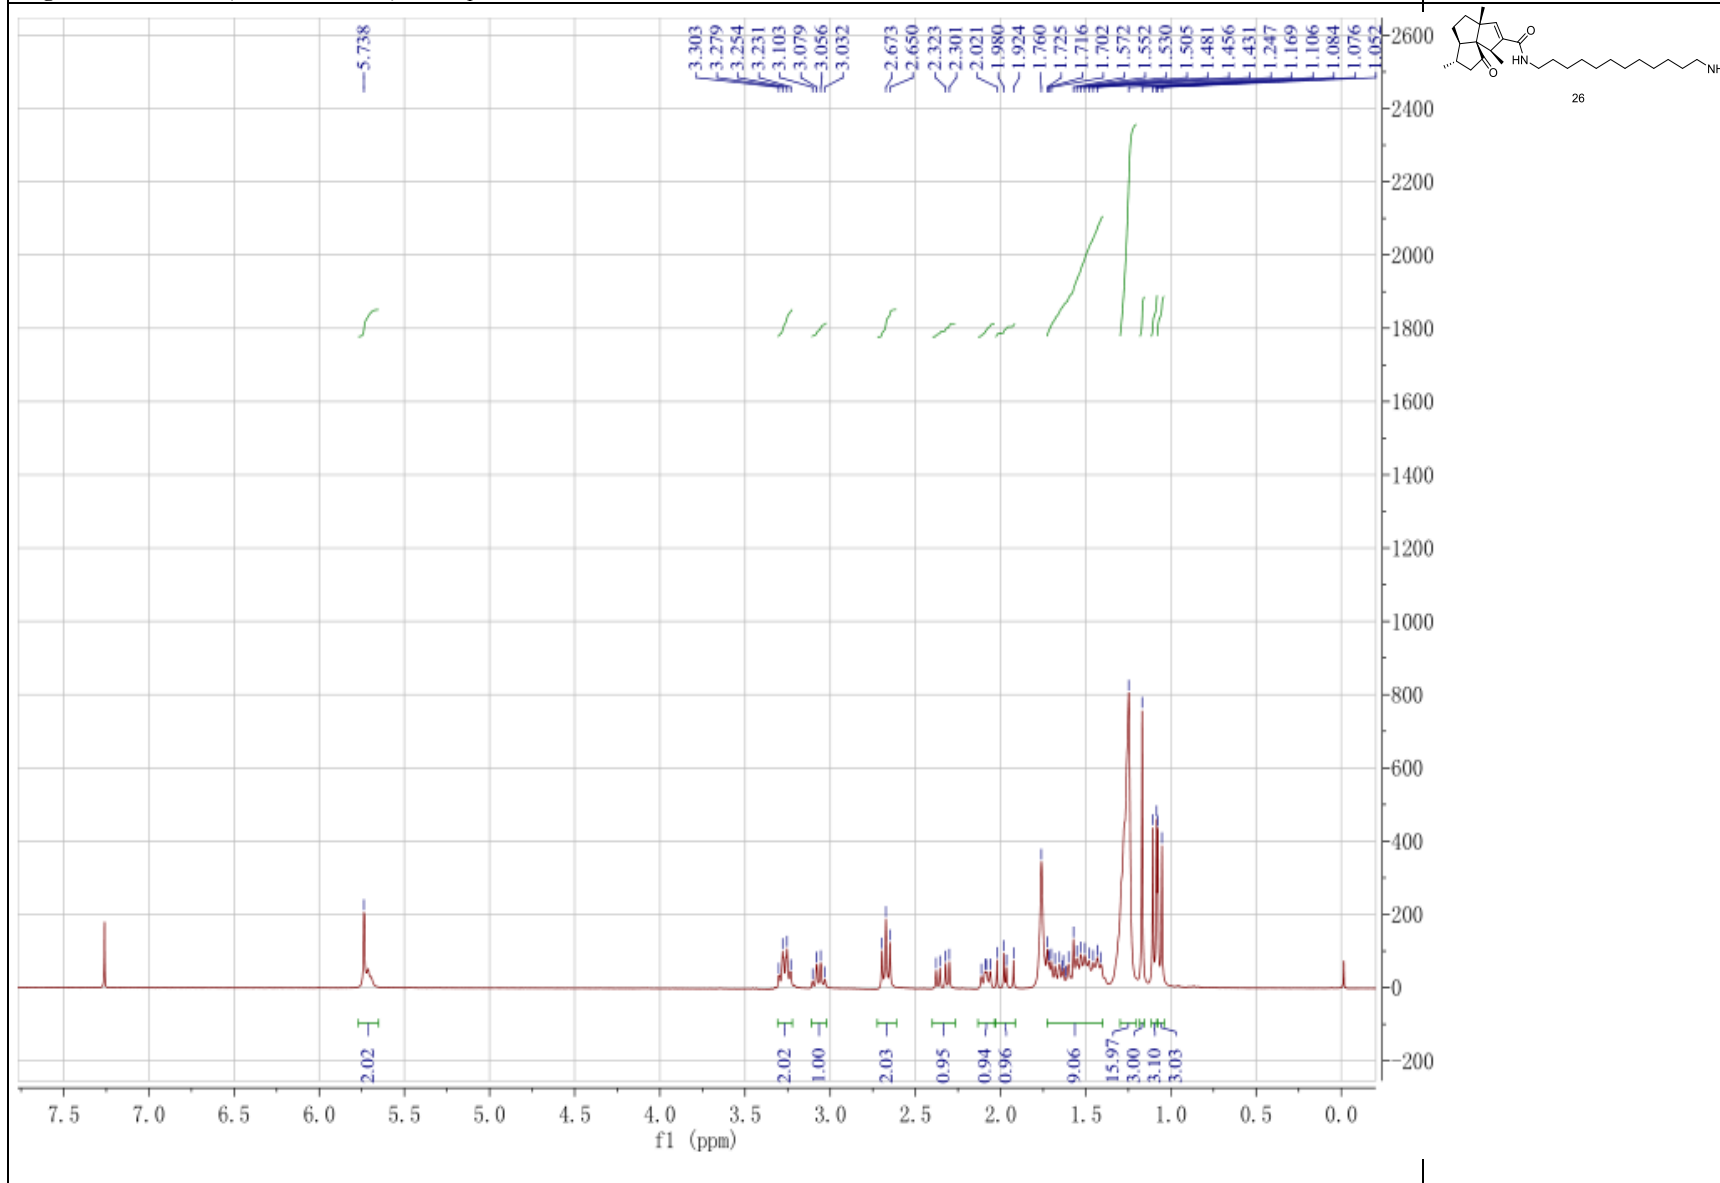

Figure S57.  $^{13}\text{C}$  NMR (75 MHz,  $\text{CDCl}_3$ ) of compound **26**

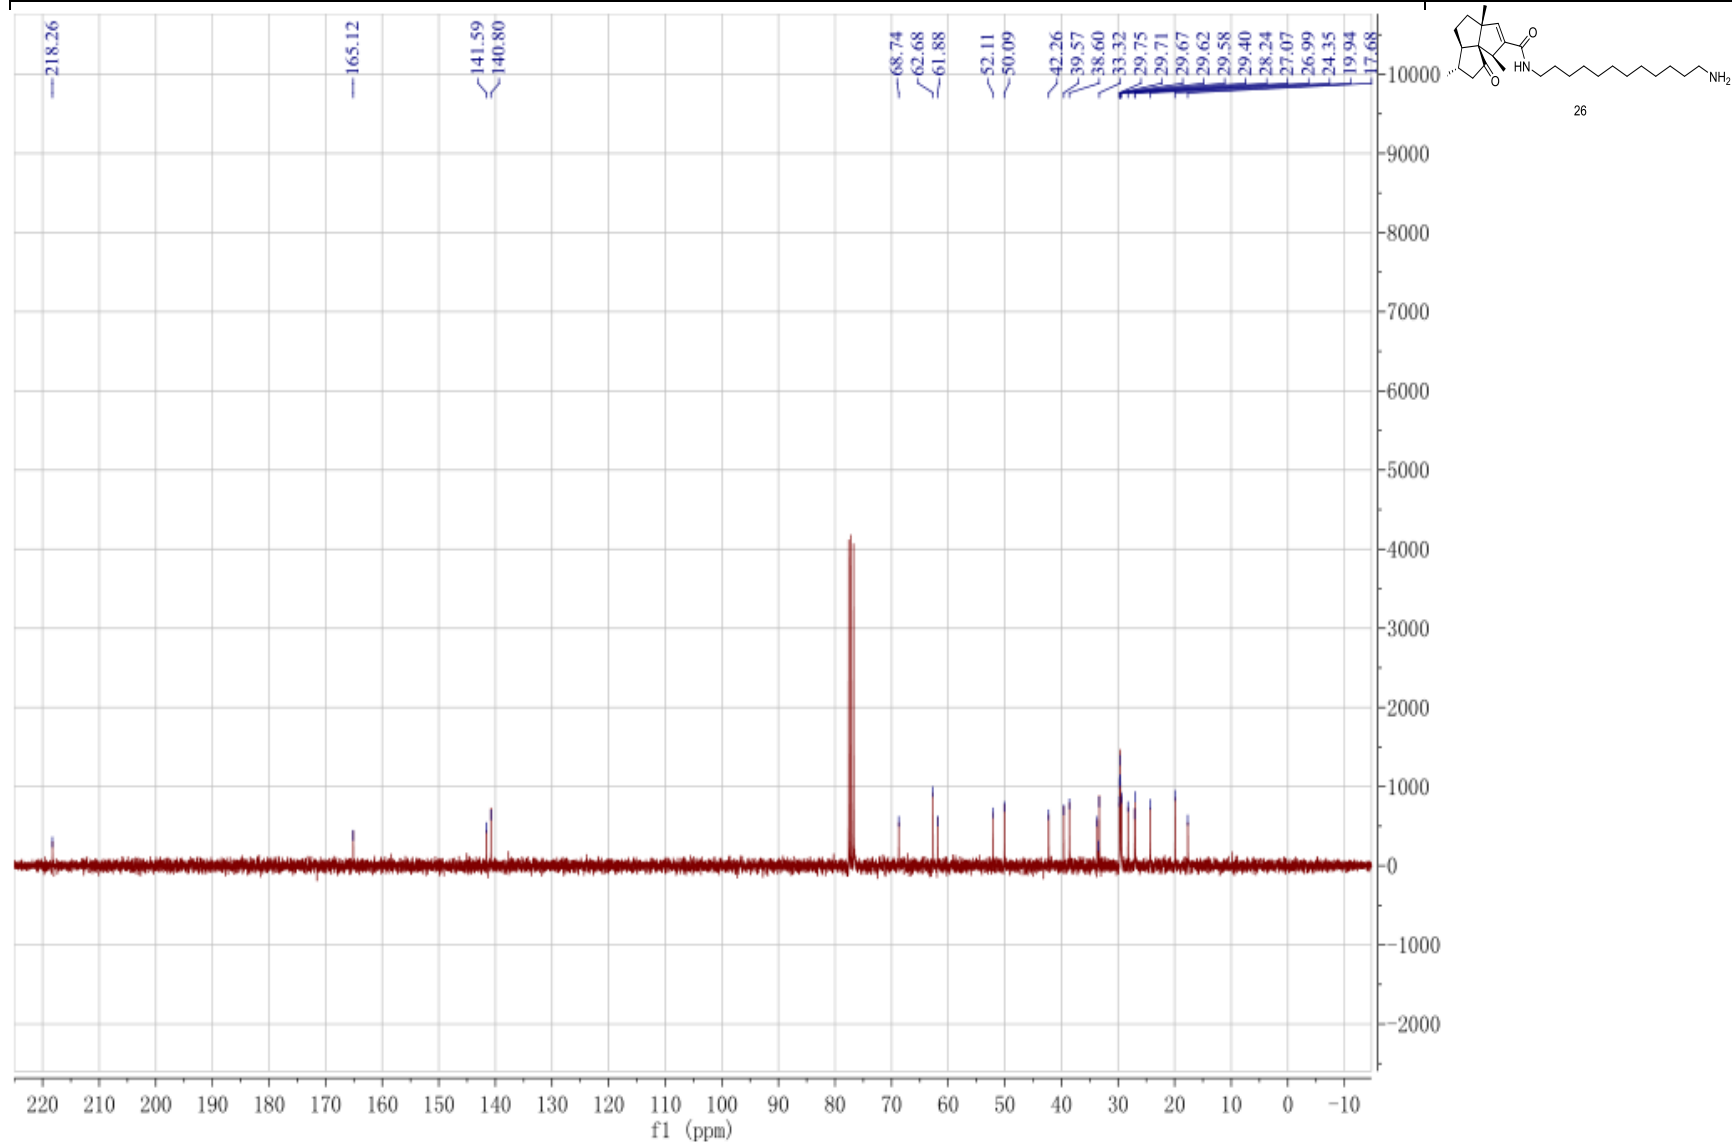

Figure S58. HRMS of compound 4

zi-10, MW=264, NH3; neg. ion  
bri140808\_10 184 (3.067) Cm (187:189-1:74)

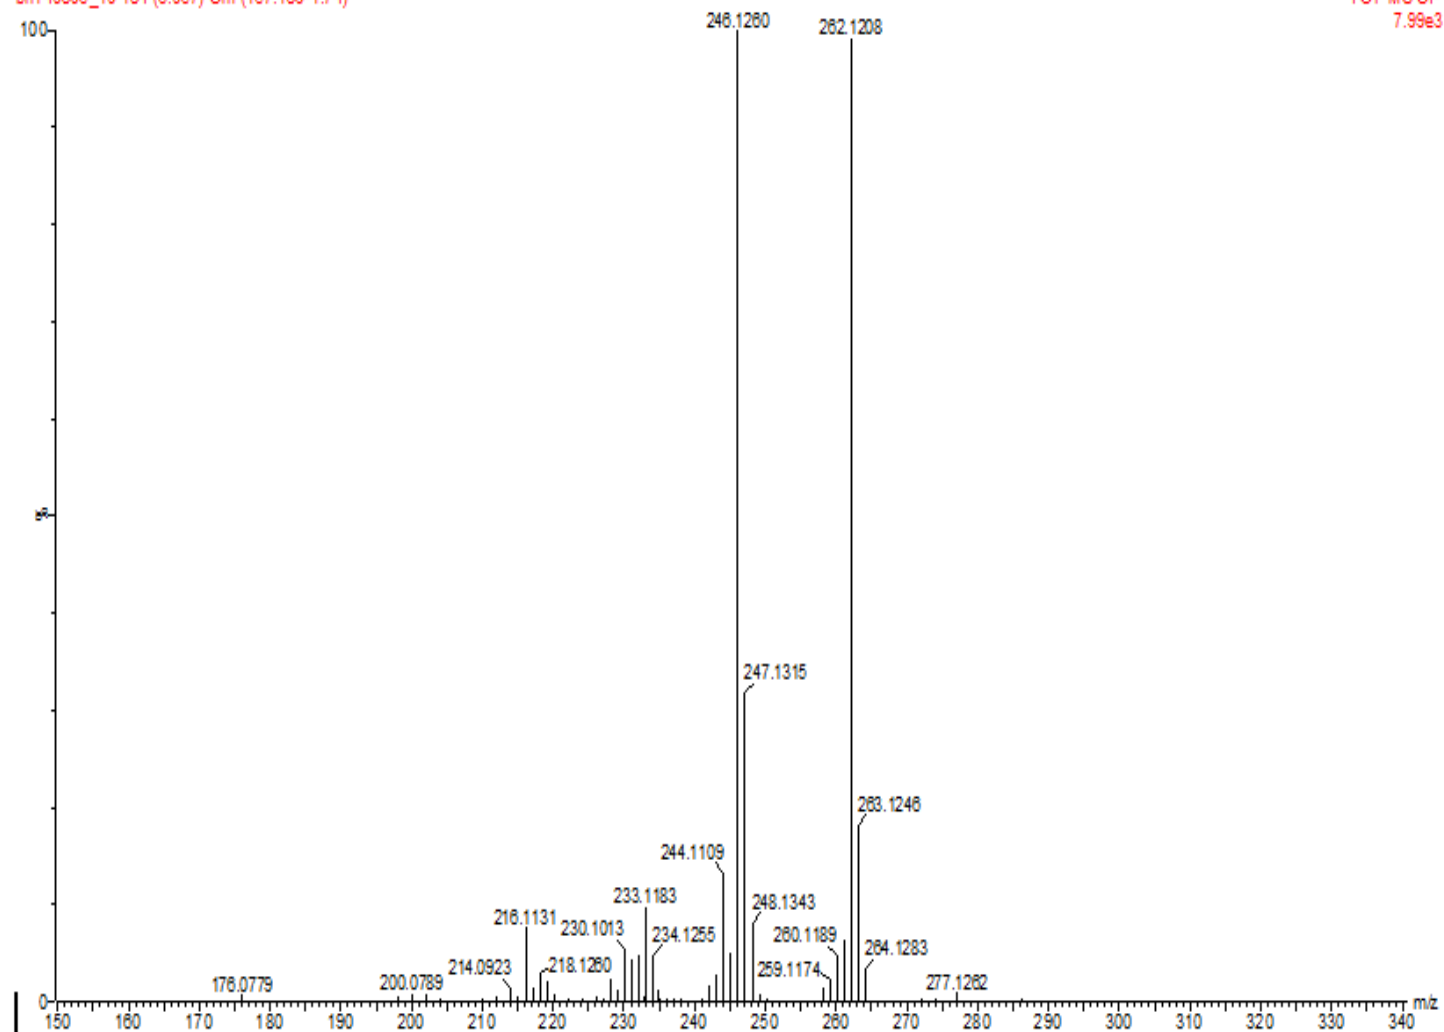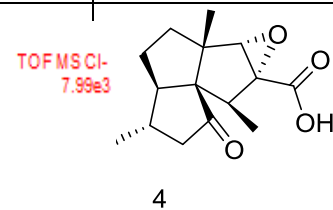

**Figure S59.** HRMS of compound **5**

**z**-**5**, MW=338, NH3; neg. ion  
bri140808\_5 89 (1.484) Cm (89.92-1.64)

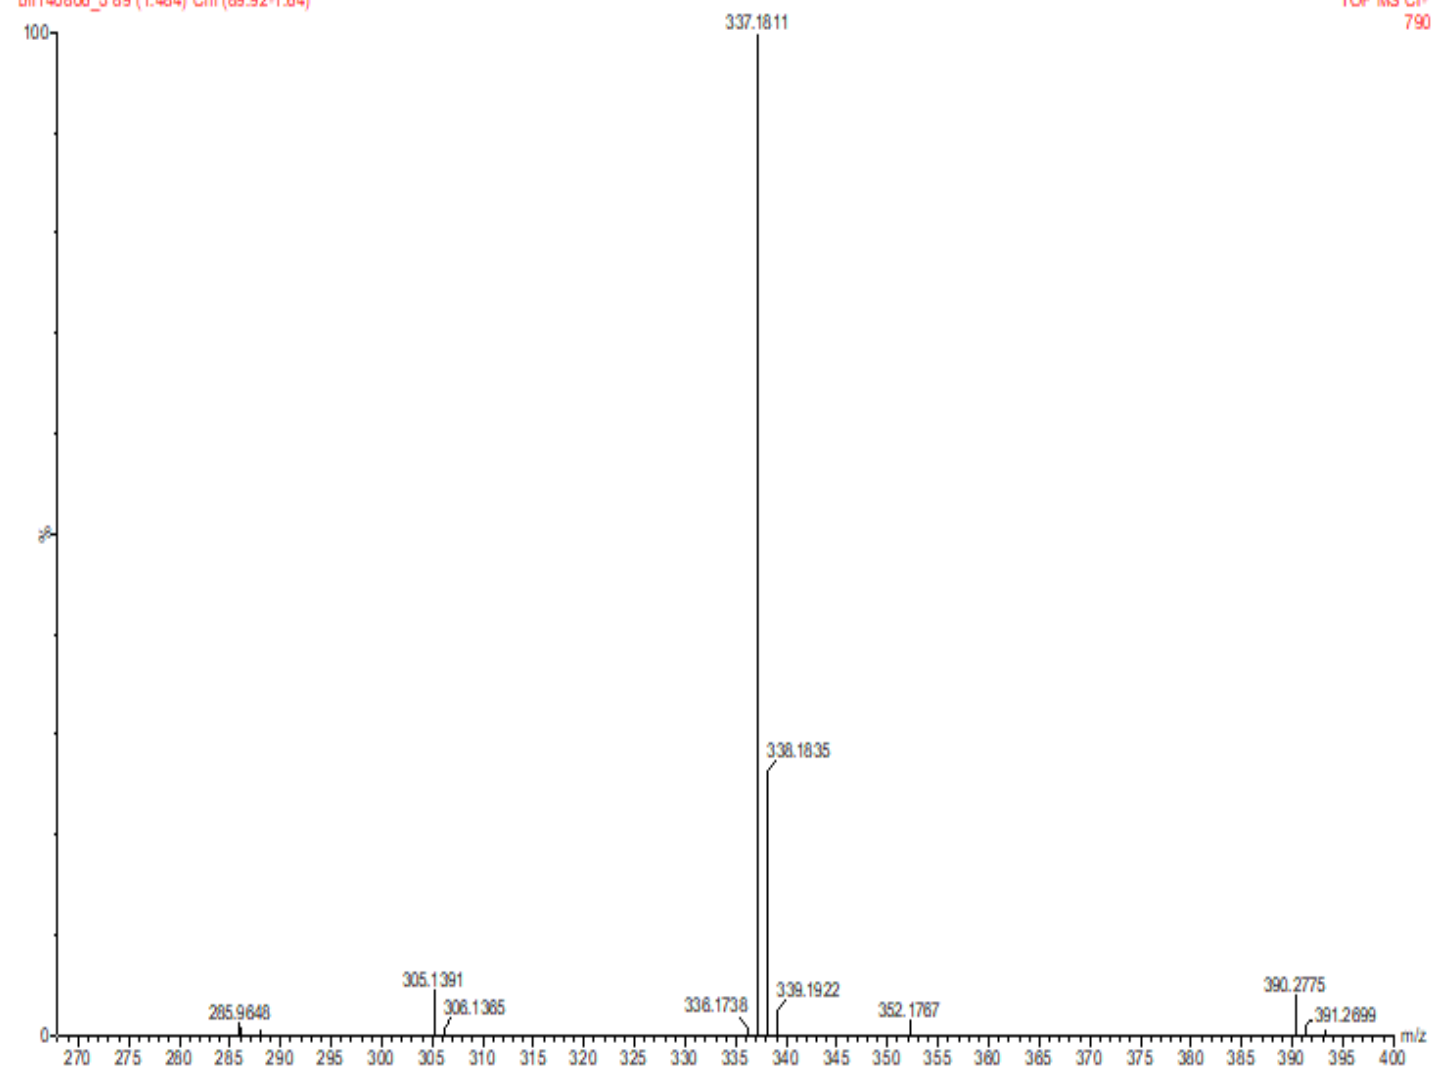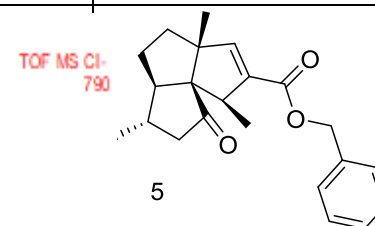

Figure S60. HRMS of compound 8

z-6, MW=406, NH3; neg. ion  
bn140806\_8 148 (2.467) Cm (145.160-1:105)

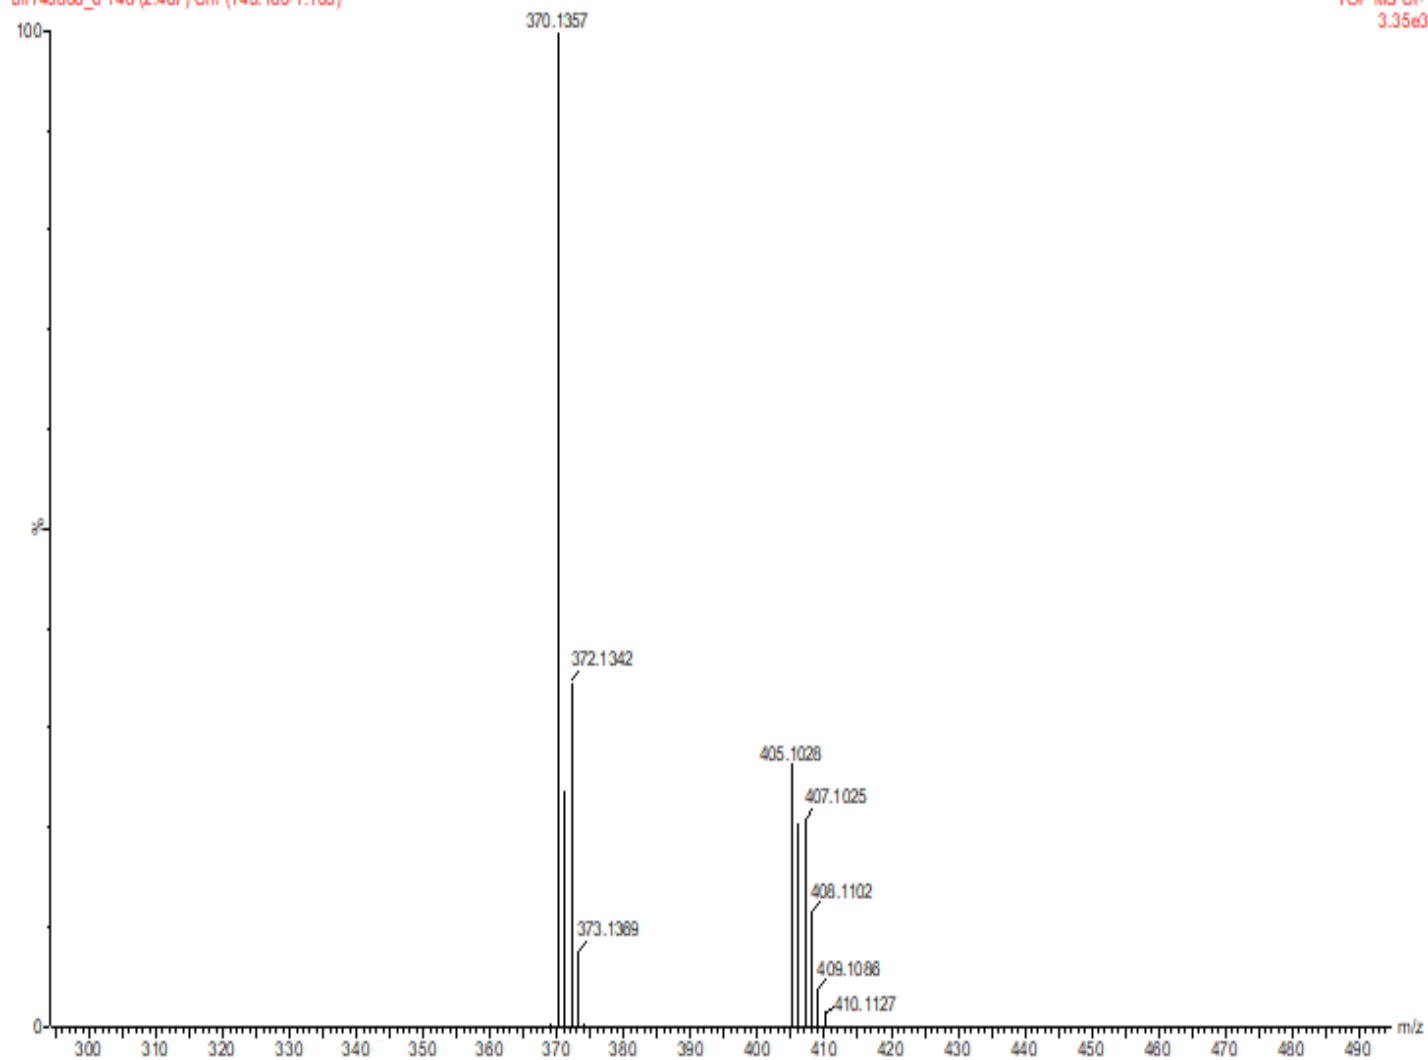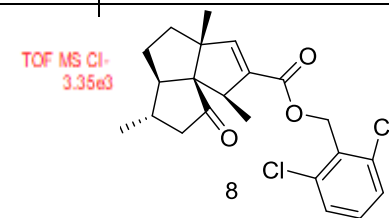

**Figure S61.** HRMS of compound **10**

z: 9, MW=372, NH3; neg. ion  
bri140806\_9 90 (1.500) Cm (90.96-1.67)

TOF MS Cl-  
551

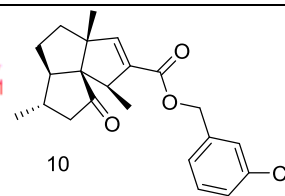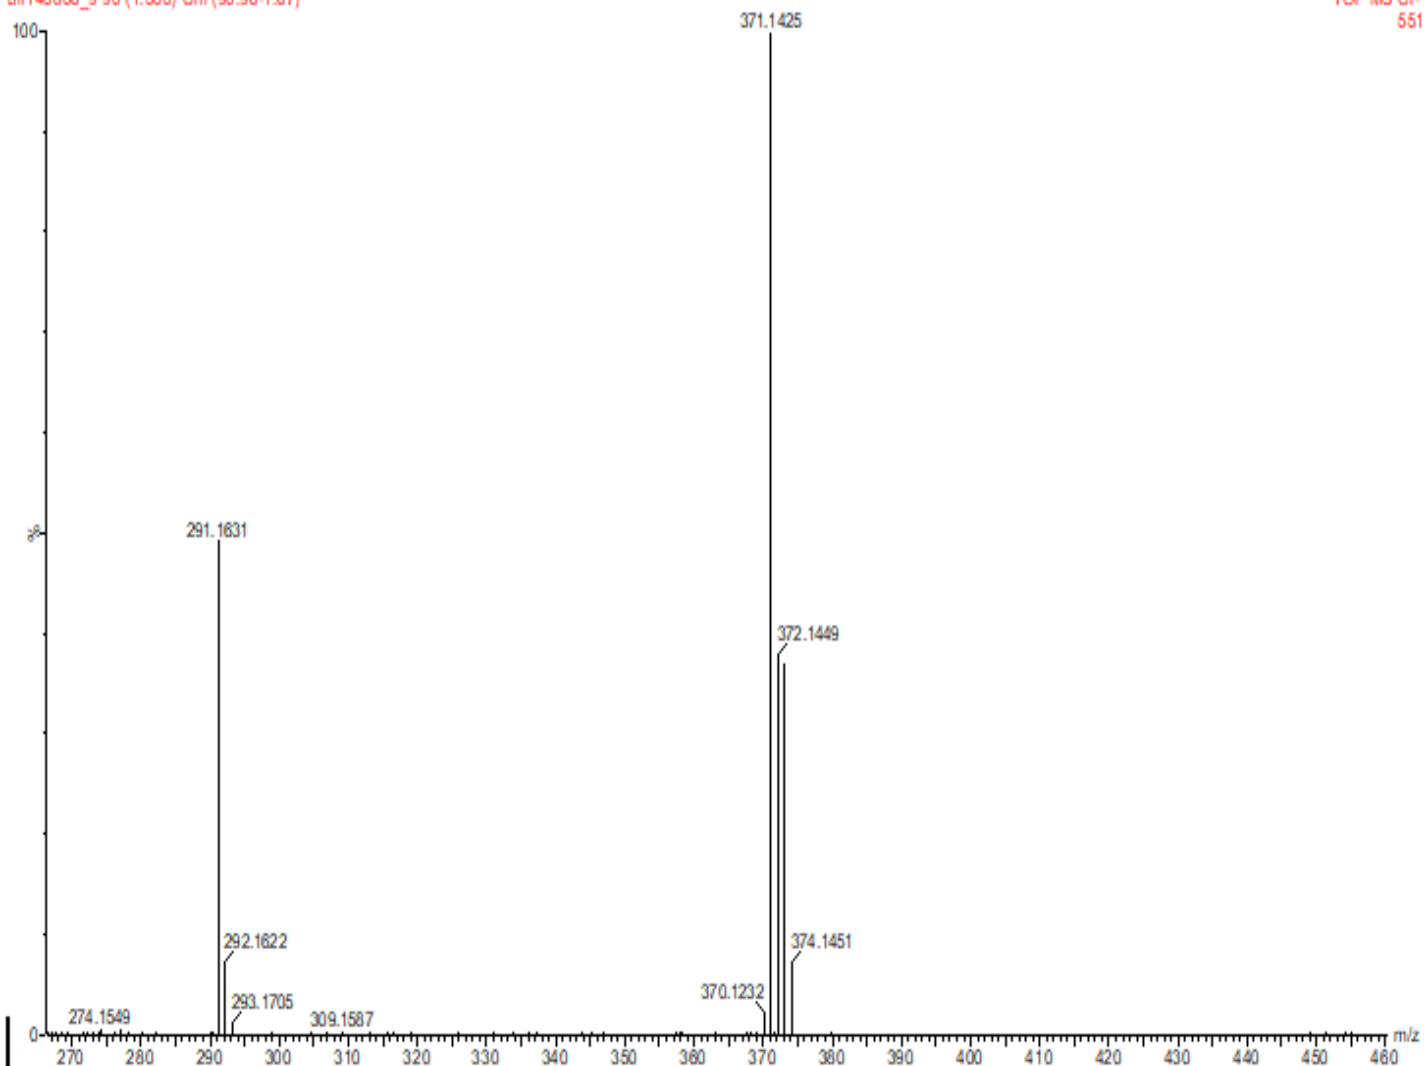

**Figure S62.** HRMS of compound **11**

$z+7$ , MW=368, NH3; neg. ion  
bri140808\_7 121 (2.017) Cm (118:122-1:105)

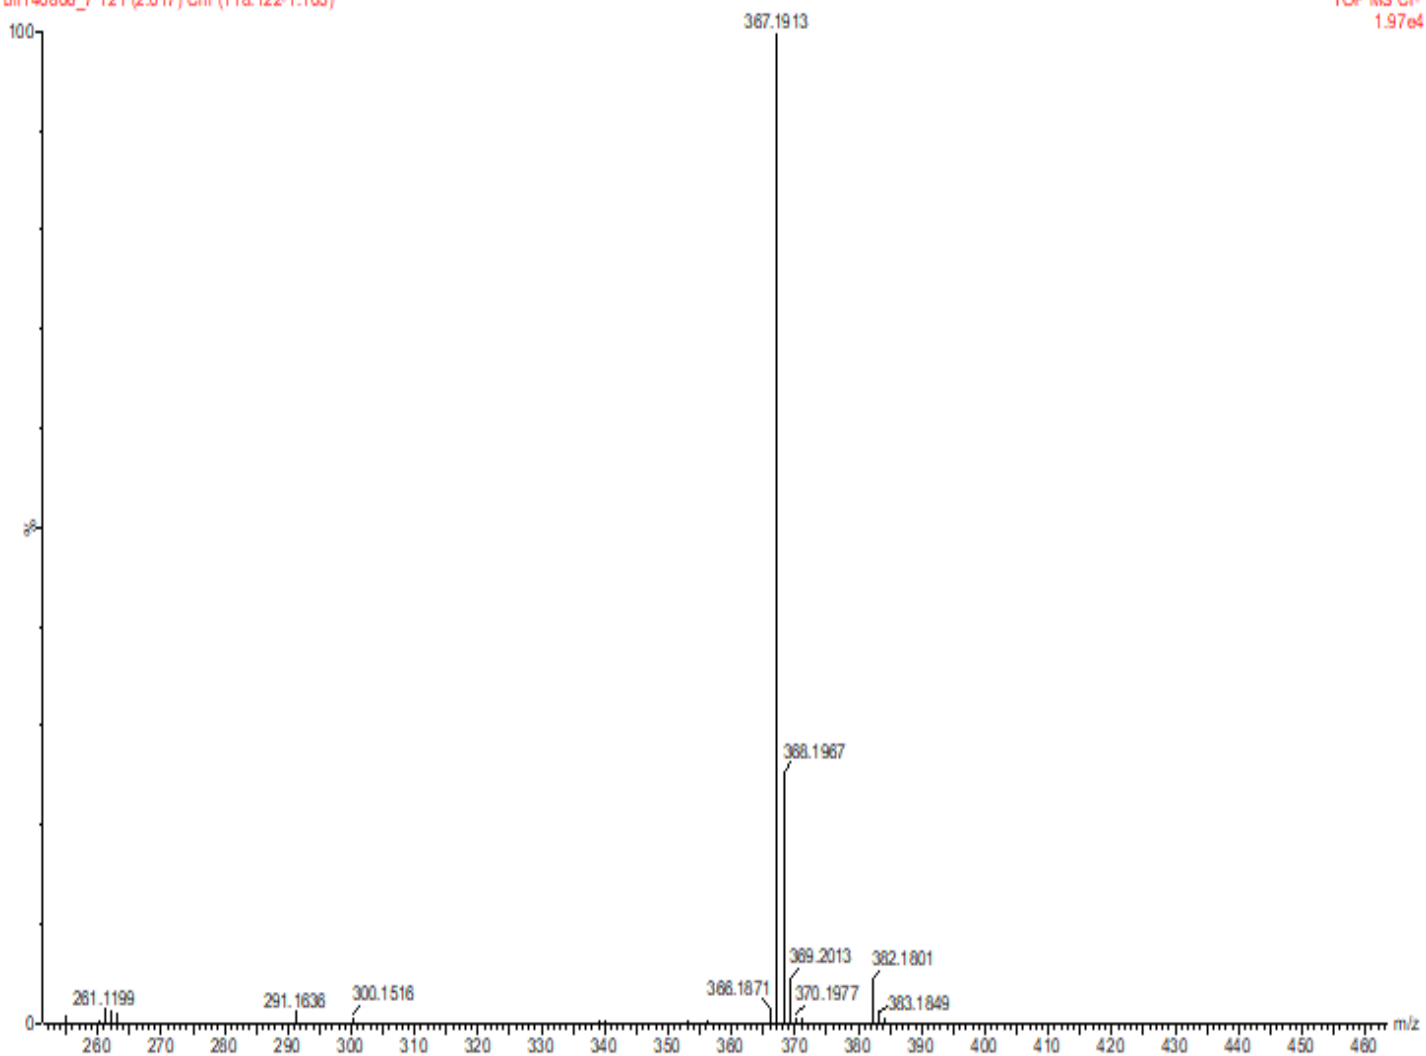

TOF MS CI-  
1.97e4

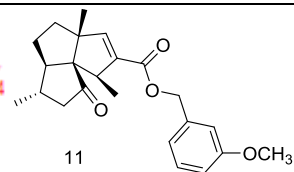



**Figure S63.** HRMS of compound **13**

**z<sup>-</sup>-4, MW=339, NH3; neg. ion**

br140806\_4 251 (4.184) Cm (248:257-1:193)

TOF MS Cl-  
1.06e4

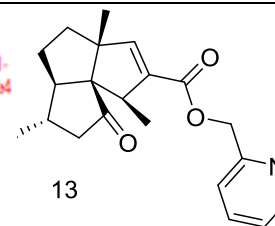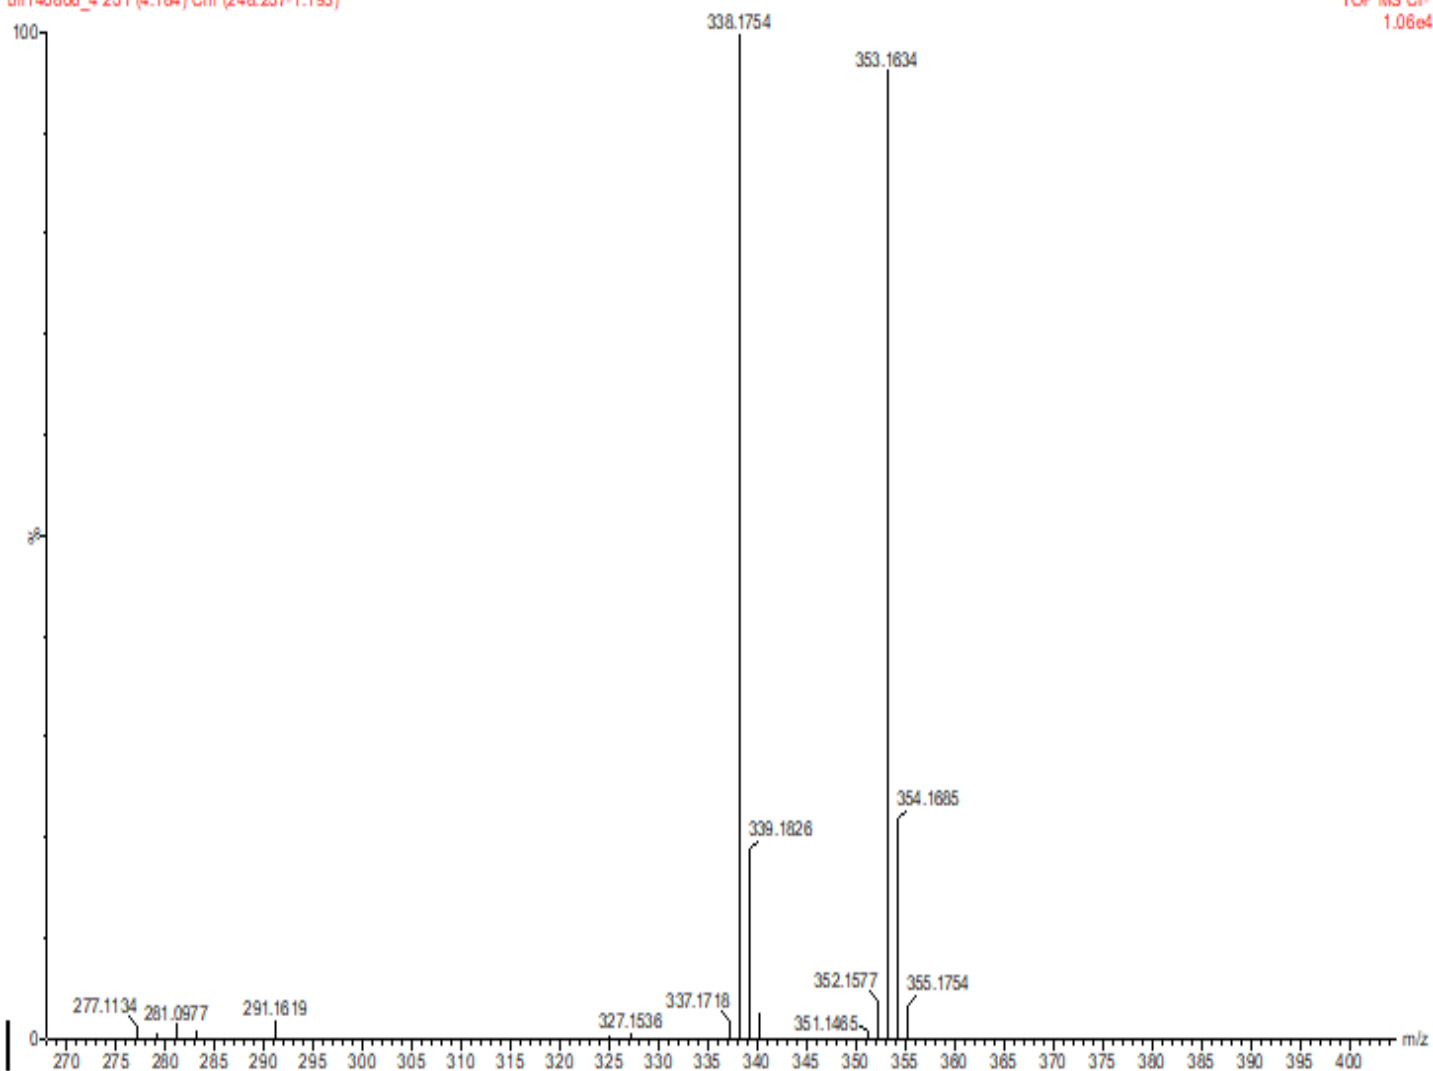

**Figure S64.** HRMS of compound **14**

z1-8, MW=339, NH3; neg. ion  
bn140806\_8 102 (1.700) Cm (98:102-1.88)

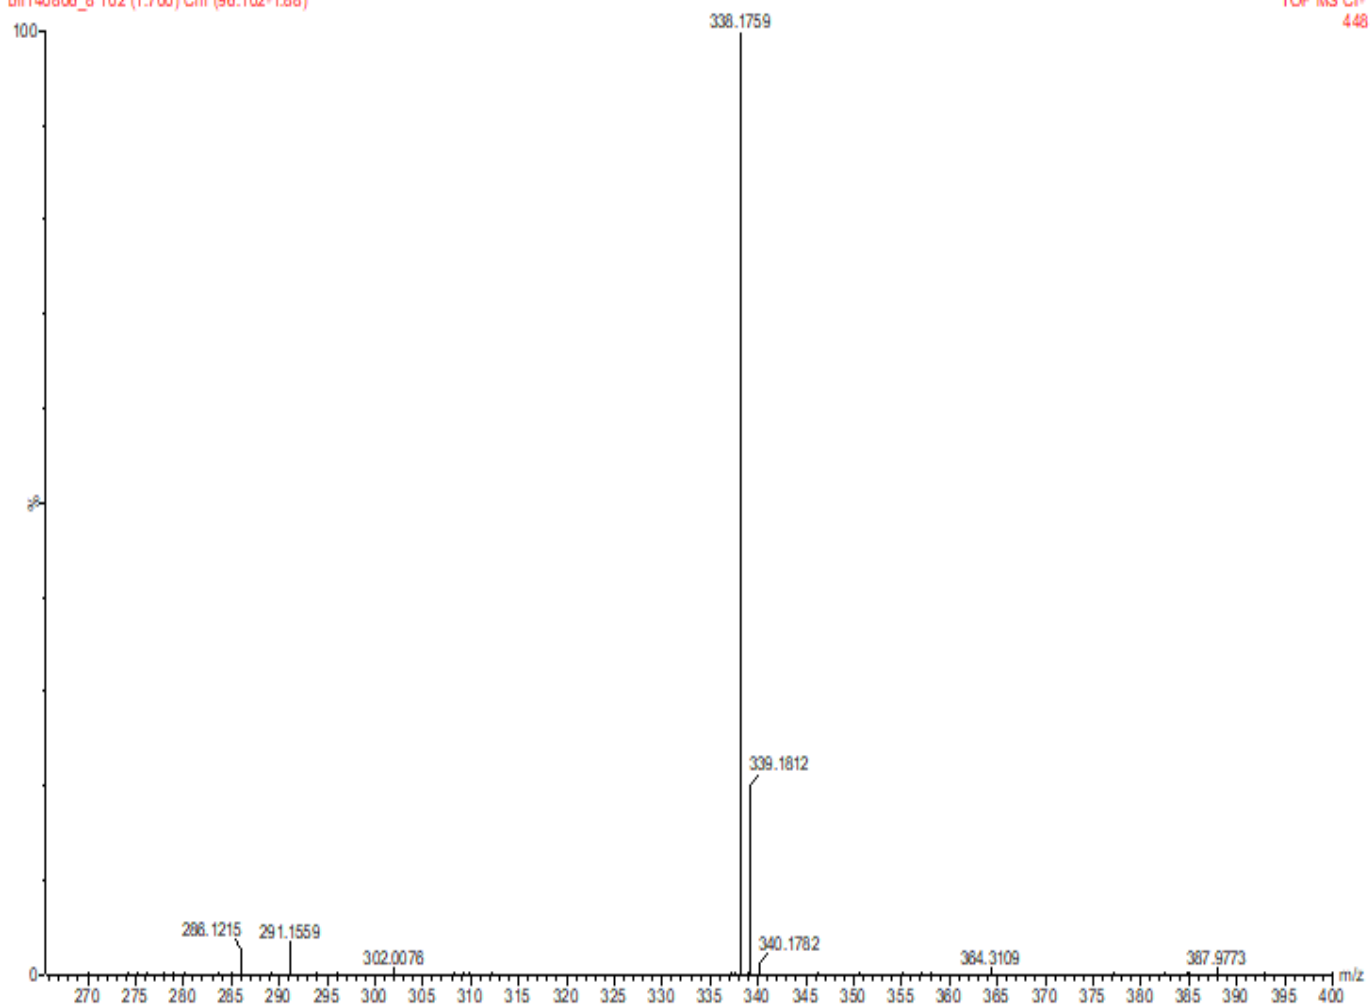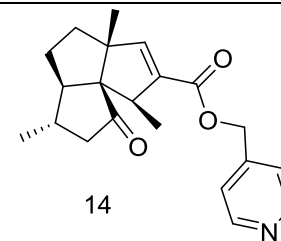

**Figure S65.** HRMS of compound **1**

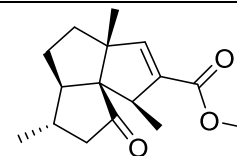

Spectrum from Data20190113-Z-3-15.wiff (sample 1) - Sample020, +TOF MS (100 - 1000) from 0.100 to 0.150 min

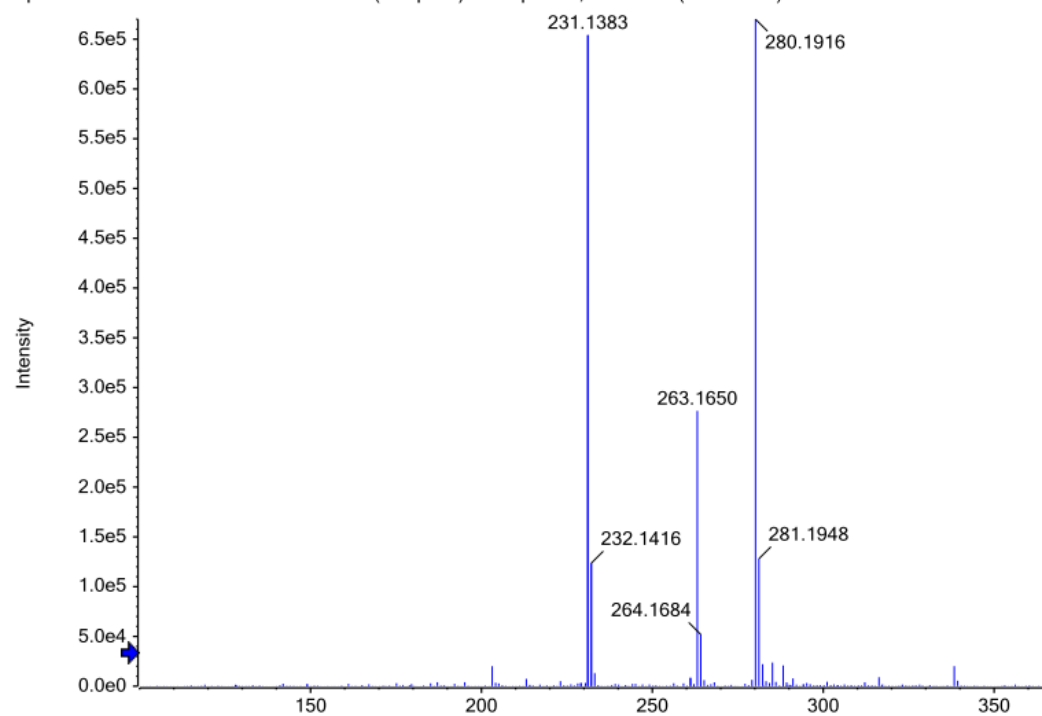

**Figure S66. HRMS of compound 2**

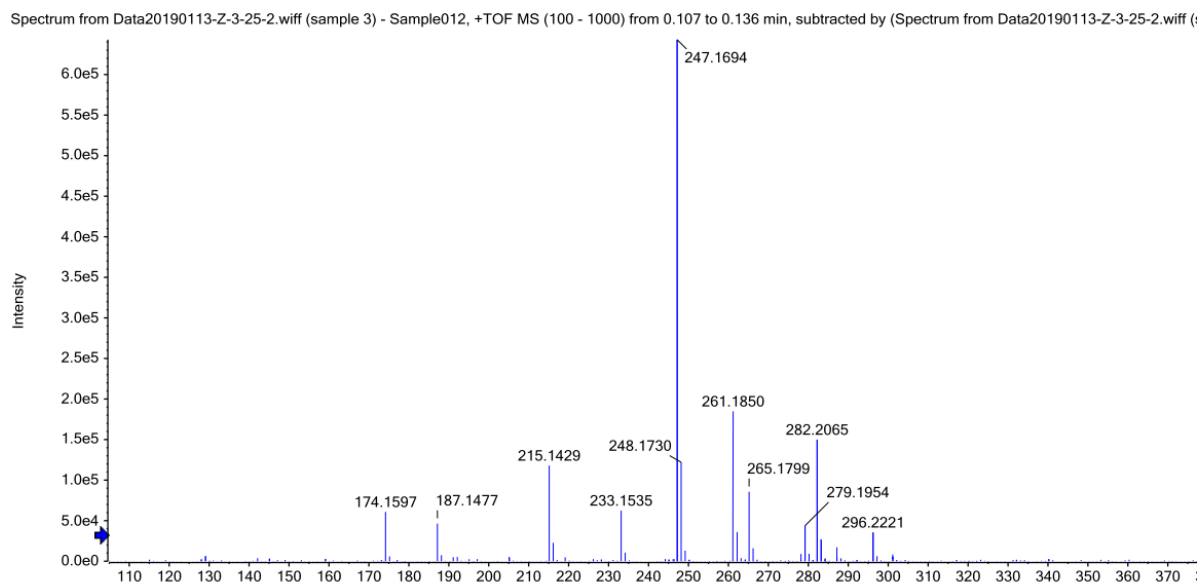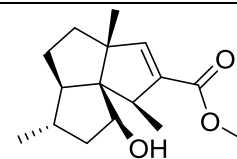

**Figure S67.** HRMS of compound **3**

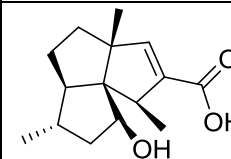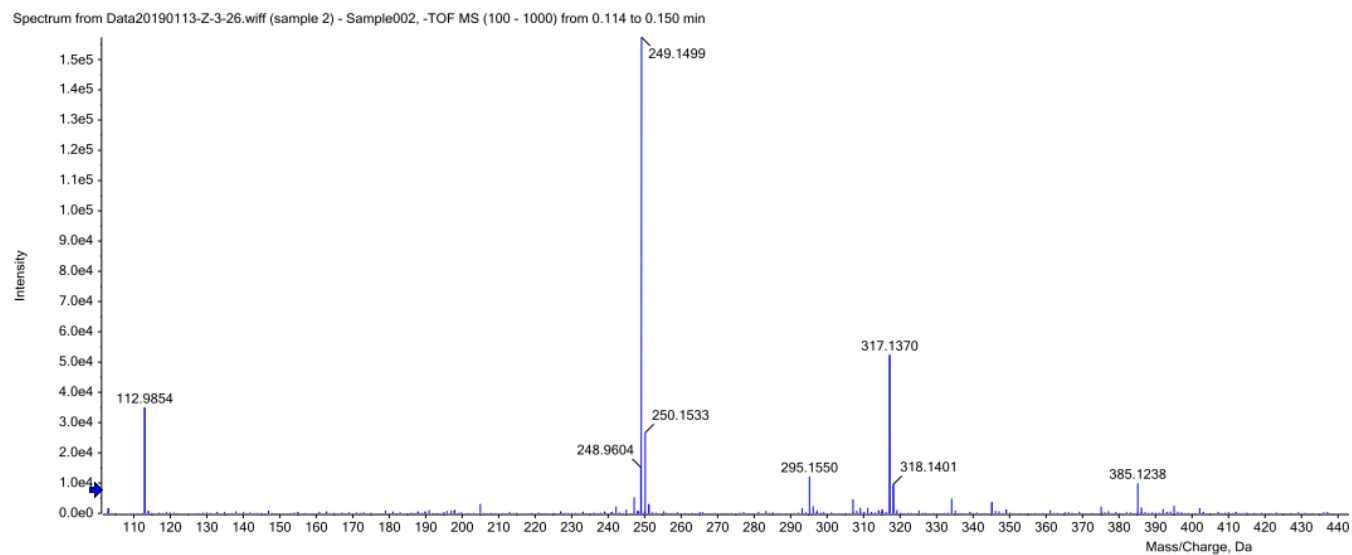

**Figure S68.** HRMS of compound **6**

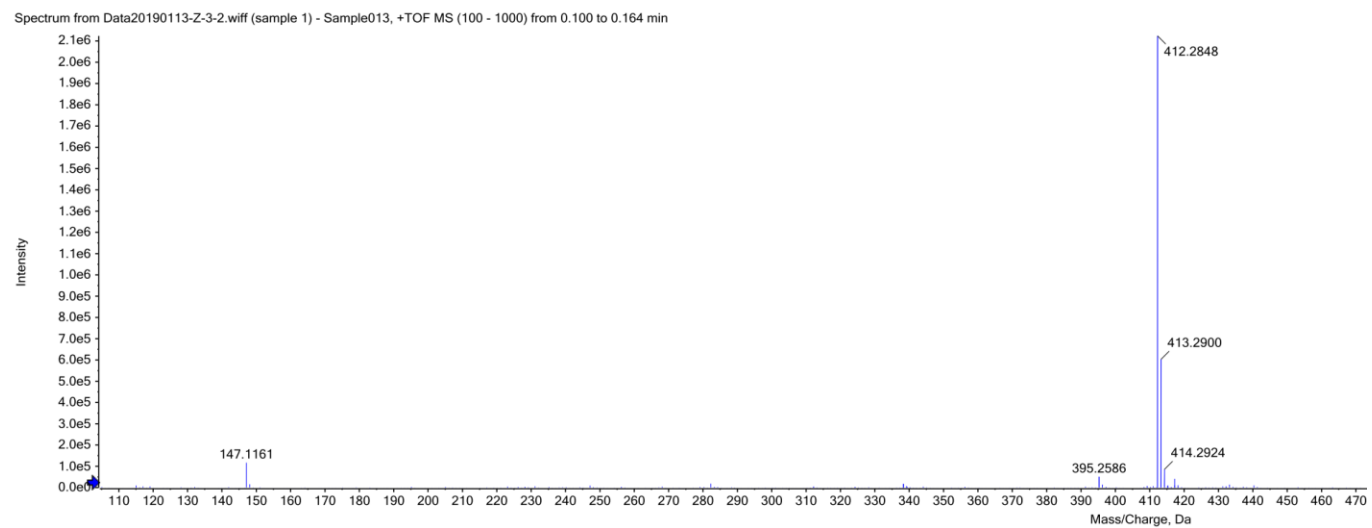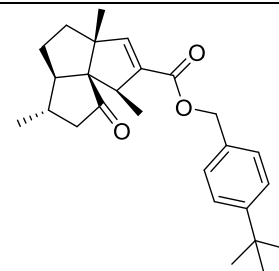

**Figure S69.** HRMS of compound **7**

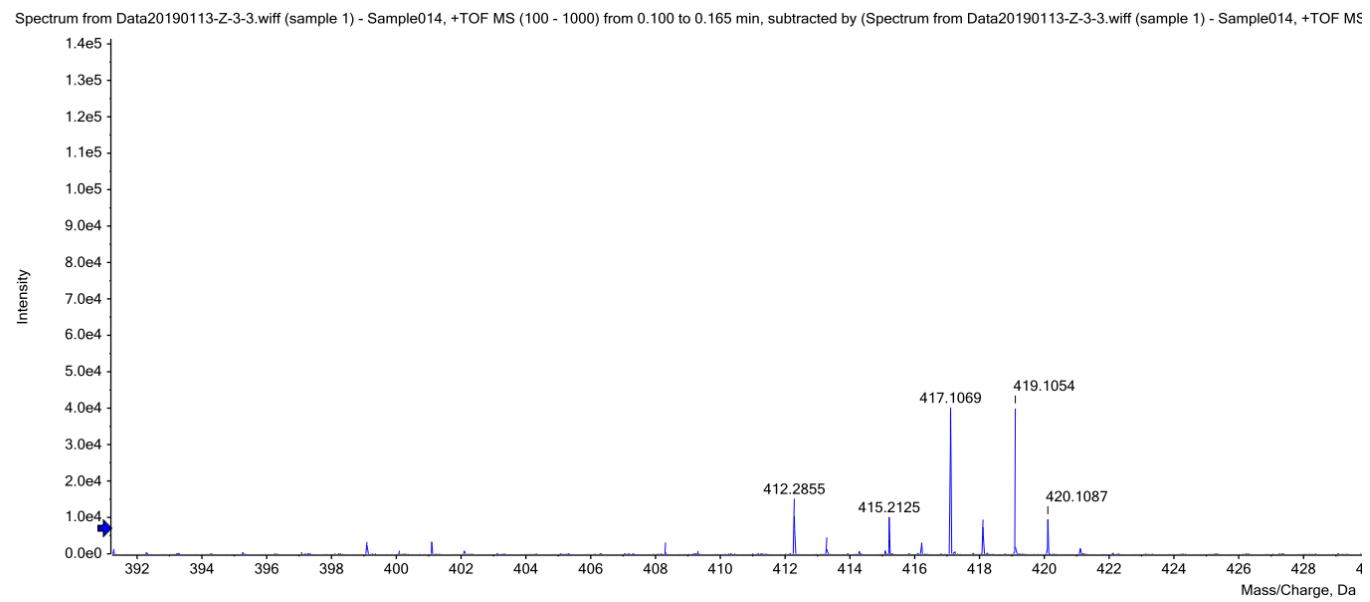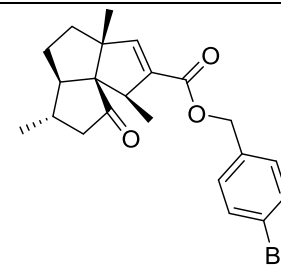

**Figure S70.** HRMS of compound **9**

Spectrum from Data20190113-Z-3-7.wiff (sample 1) - Sample016, +TOF MS (100 - 1000) from 0.100 to 0.157 min

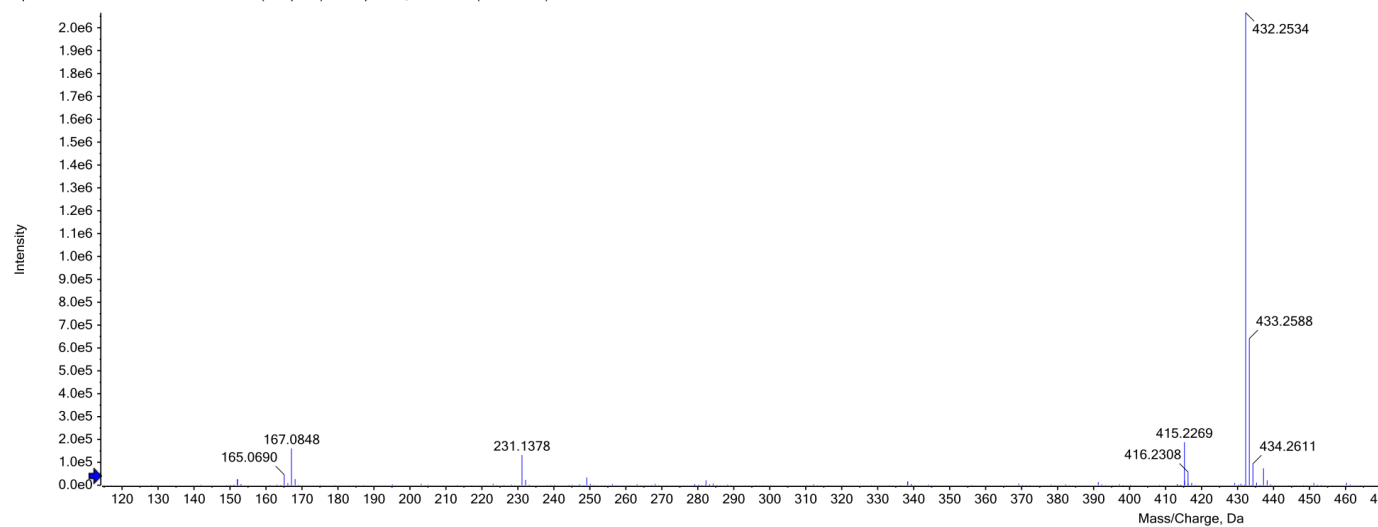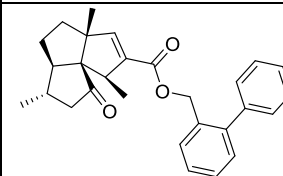



**Figure S71.** HRMS of compound **12**

Spectrum from Data20190113-Z-3-13.wiff (sample 1) - Sample015, +TOF MS (100 - 1000) from 0.093 to 0.164 min

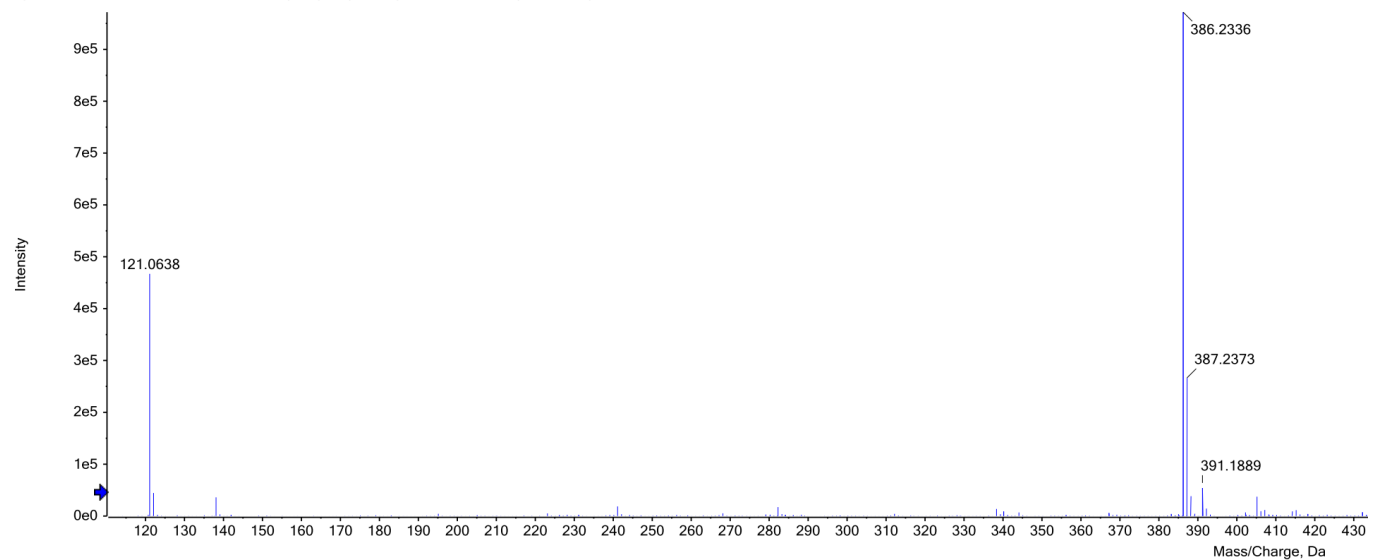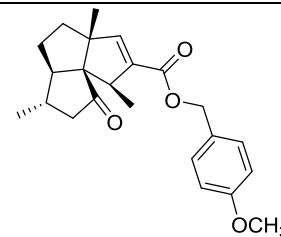

**Figure S72.** HRMS of compound **15**

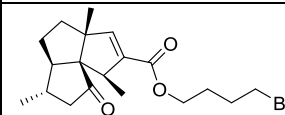

Spectrum from Data20190113-Z-3-17.wiff (sample 1) - Sample019, +TOF MS (100 - 1000) from 0.107 to 0.150 min

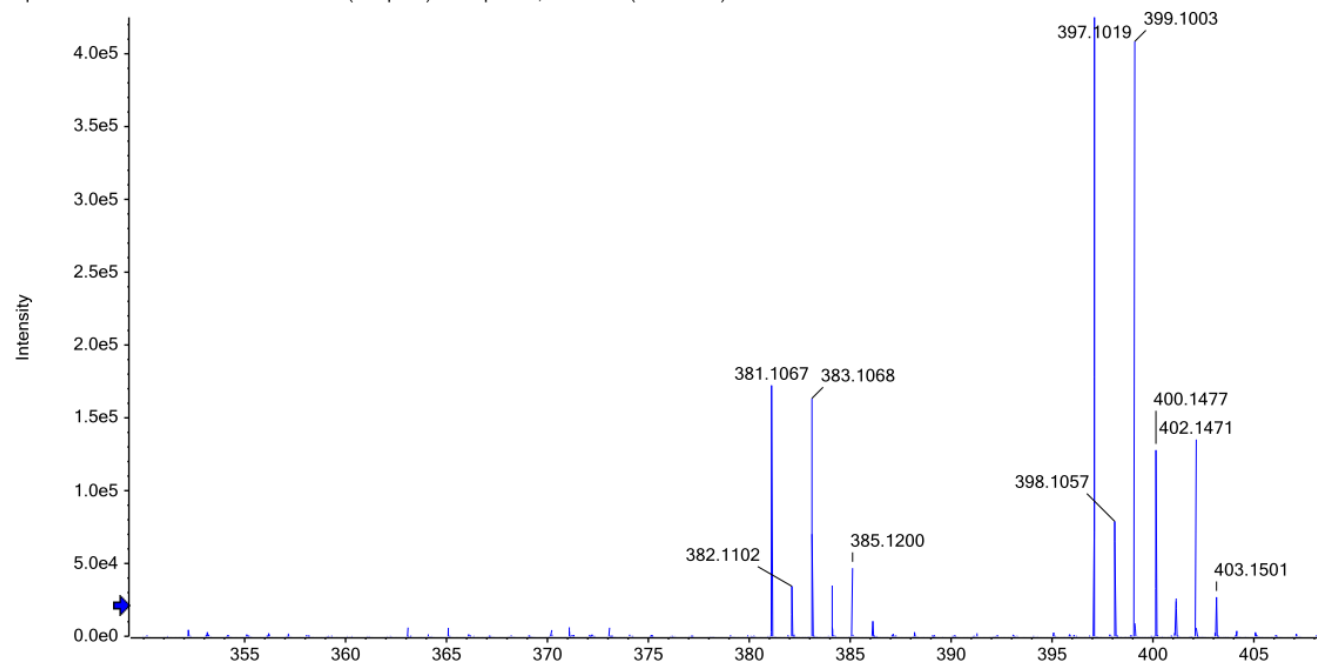

**Figure S73.** HRMS of compound **16**

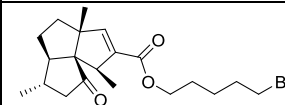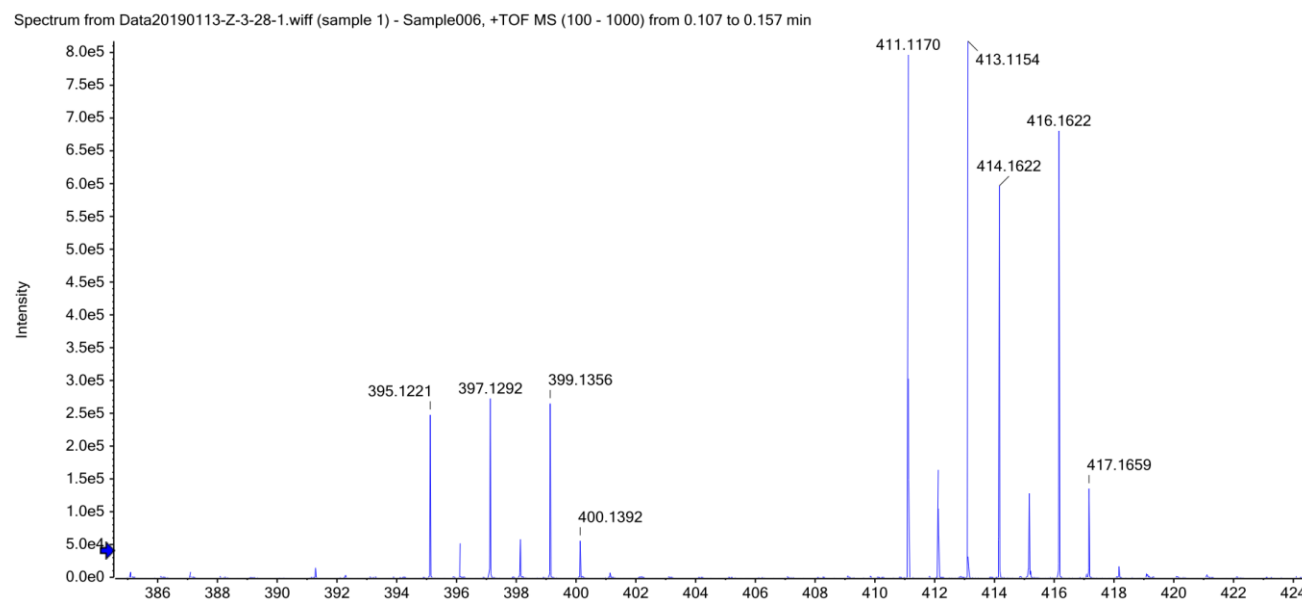

**Figure S74.** HRMS of compound **17**

Spectrum from Data20190113-Z-3-28-2.wiff (sample 1) - Sample010, +TOF MS (100 - 1000) from 0.107 to 0.150 min

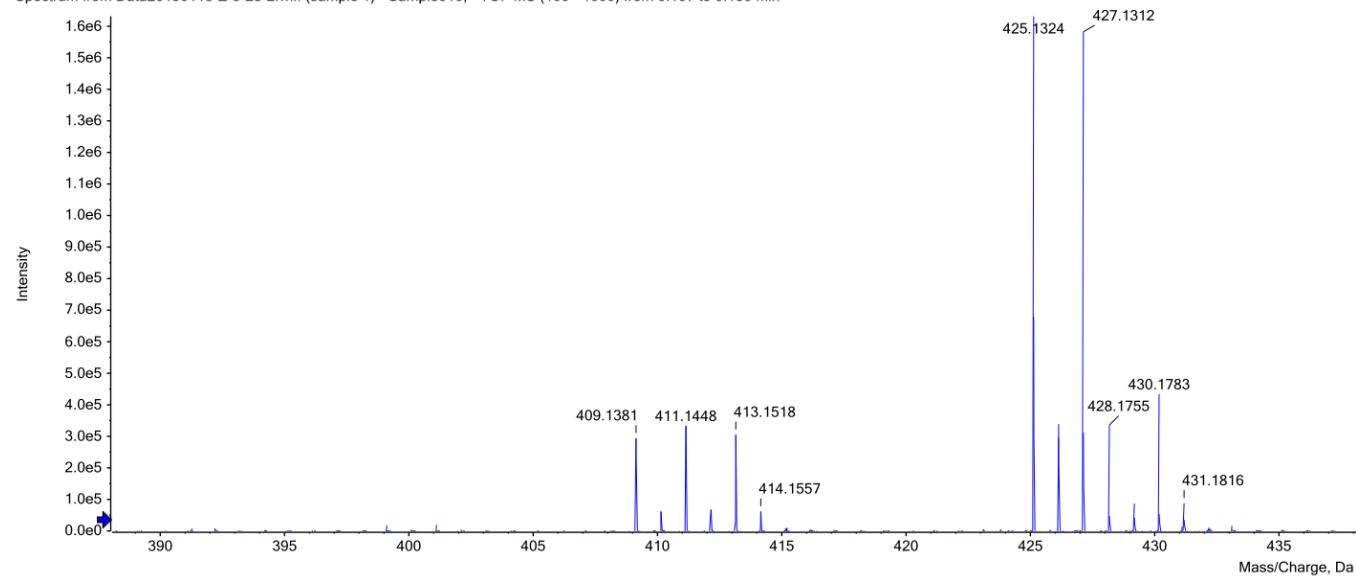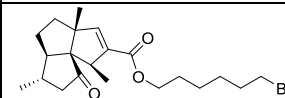

**Figure S75.** HRMS of compound **18**

Spectrum from Data20190113-Z-3-28-3.wiff (sample 1) - Sample003, +TOF MS (100 - 1000) from 0.114 to 0.164 min

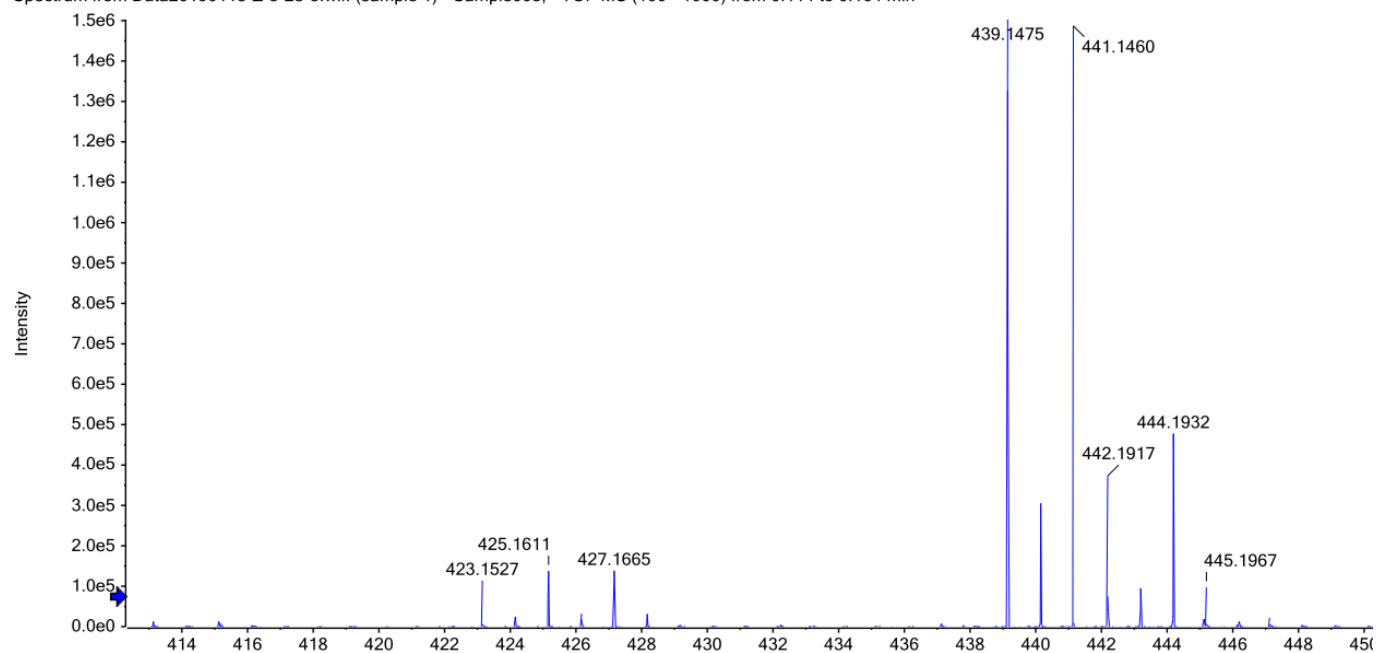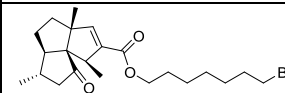

**Figure S76.** HRMS of compound **19**

Spectrum from Data20190113-Z-3-28-4.wiff (sample 1) - Sample011, +TOF MS (100 - 1000) from 0.100 to 0.172 min

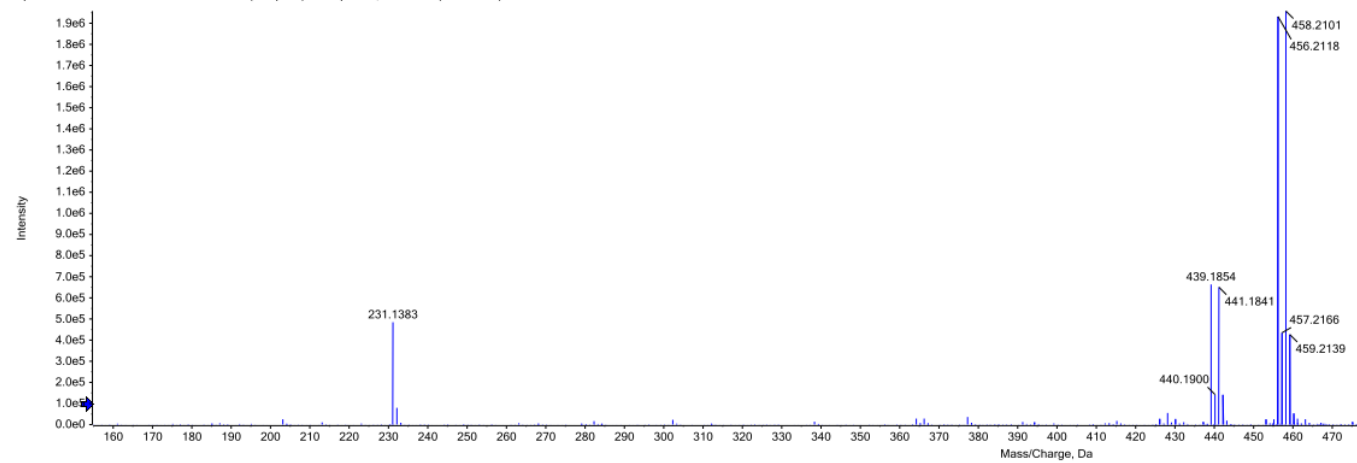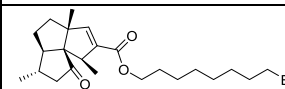

**Figure S77.** HRMS of compound **20**

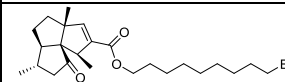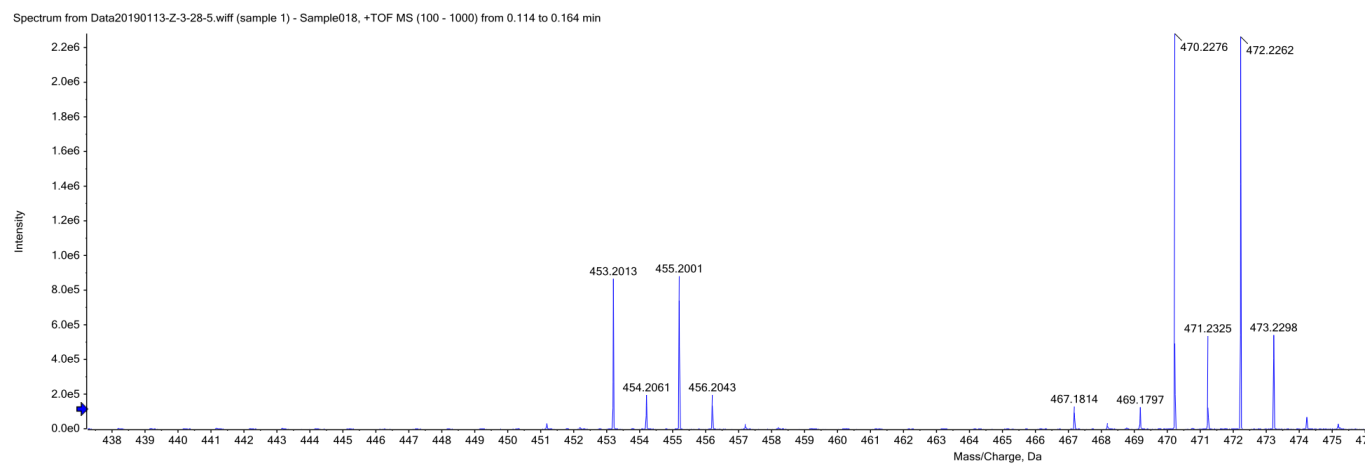

**Figure S78.** HRMS of compound **21**

Spectrum from Data20190113-Z-3-21-1.wiff (sample 1) - Sample017, +TOF MS (100 - 1000) from 0.114 to 0.164 min

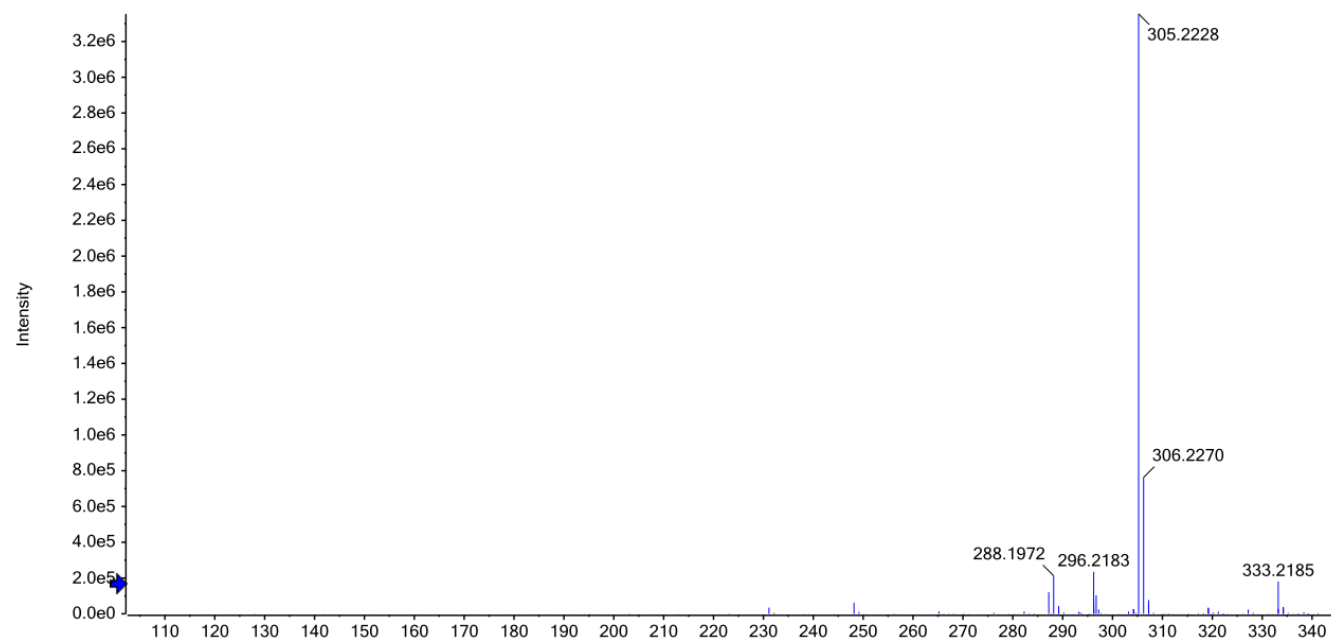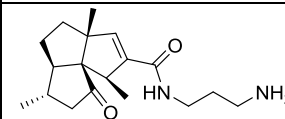



**Figure S79.** HRMS of compound **22**

Spectrum from Data20190113-Z-3-21-2.wiff (sample 1) - Sample004, +TOF MS (100 - 1000) from 0.107 to 0.150 min

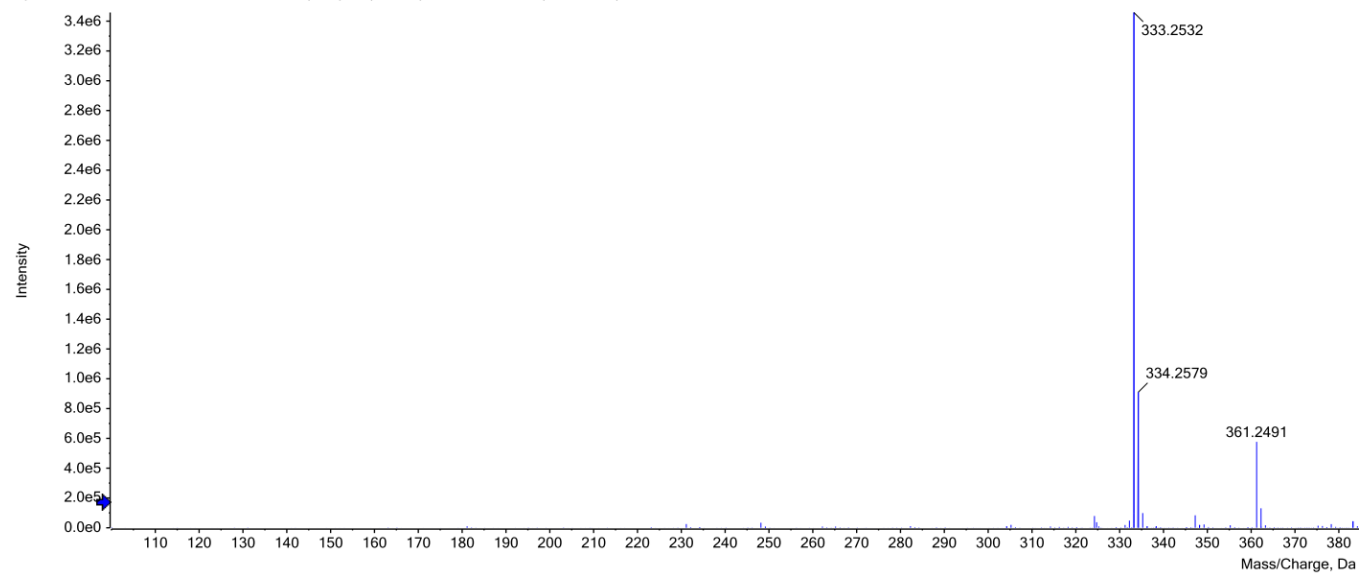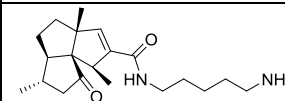

**Figure S80.** HRMS of compound **23**

Spectrum from Data20190113-Z-3-21-3.wiff (sample 1) - Sample009, +TOF MS (100 - 1000) from 0.093 to 0.172 min

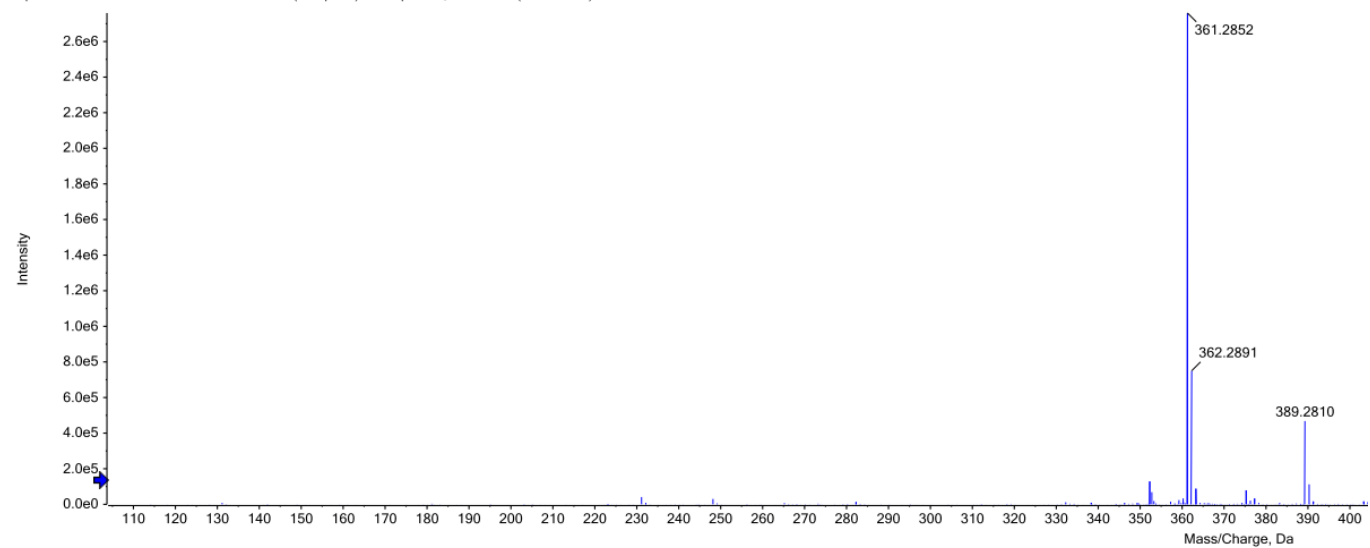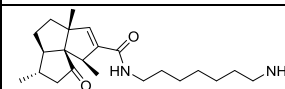

**Figure S81.** HRMS of compound **24**

Spectrum from Data20190113-Z-3-21-4.wiff (sample 1) - Sample007, +TOF MS (100 - 1000) from 0.100 to 0.172 min

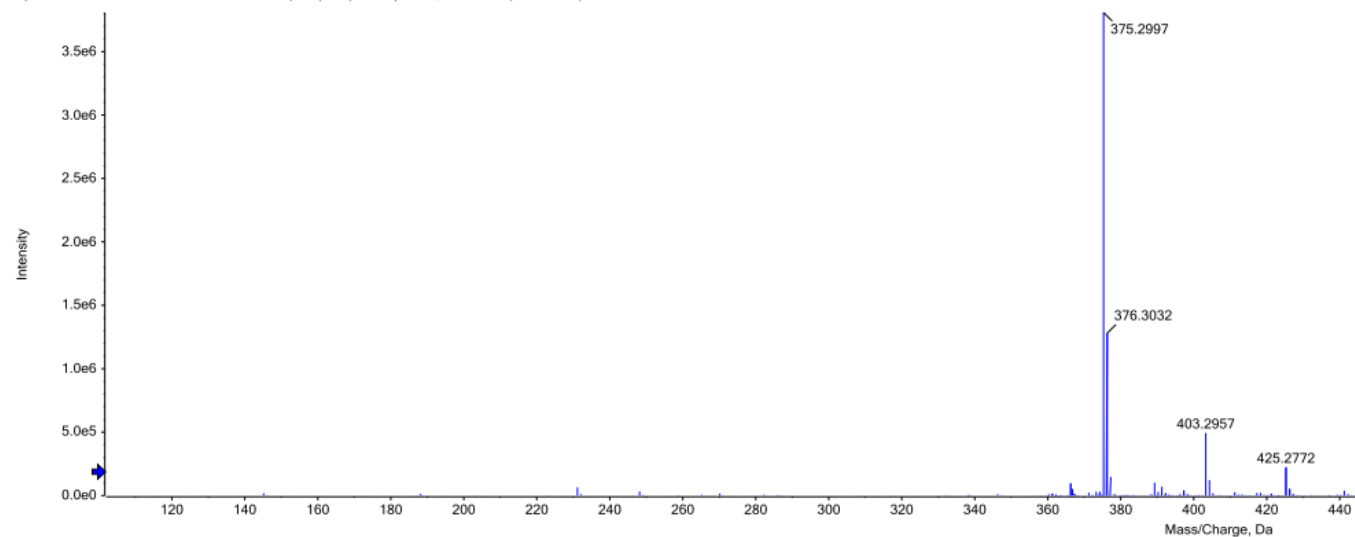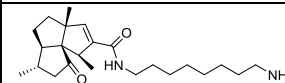

**Figure S82.** HRMS of compound **25**

Spectrum from Data20190113-Z-3-21-5.wiff (sample 1) - Sample008, +TOF MS (100 - 1000) from 0.107 to 0.164 min

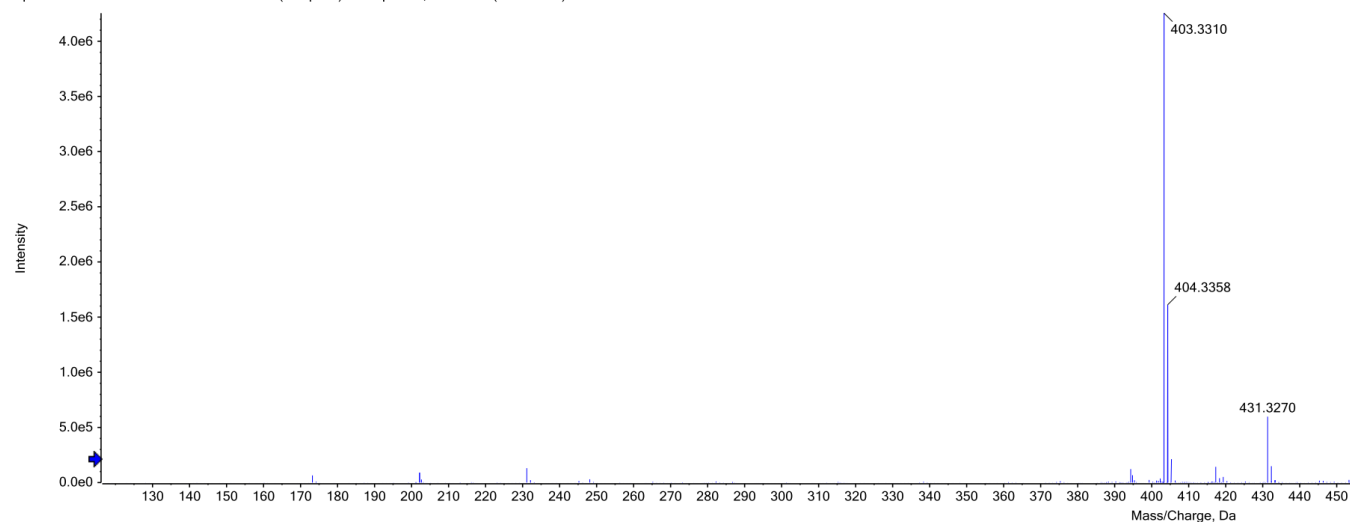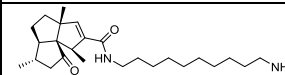

**Figure S83.** HRMS of compound **26**

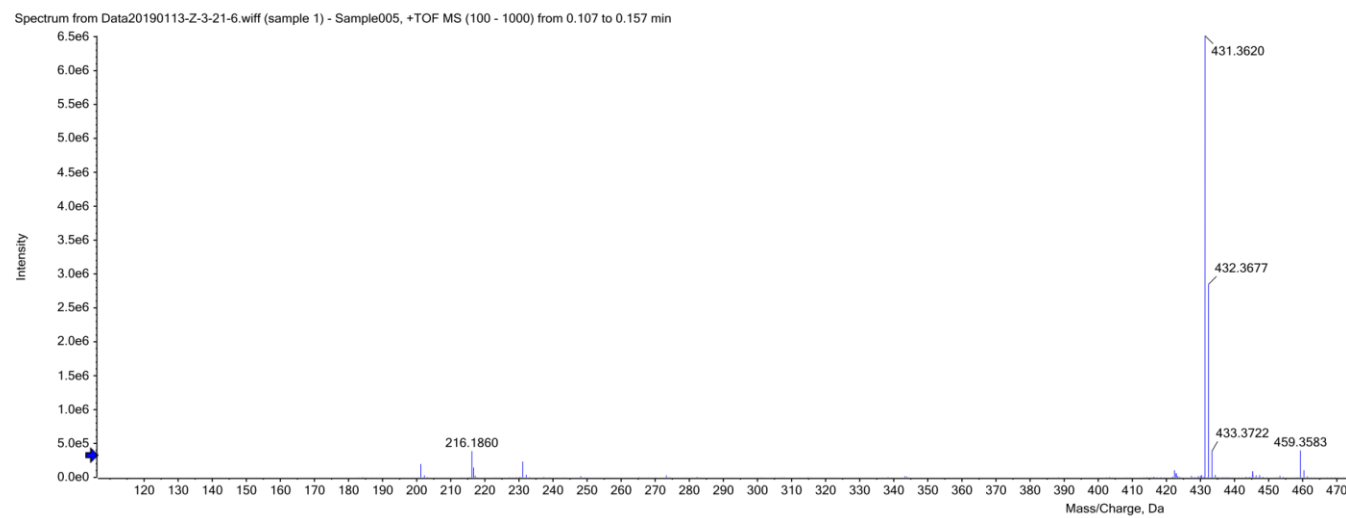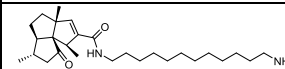

Supplement: s1 [file s1]
